# Supplementary material for: Special Prey, Special Glue: NMR Spectroscopy on Aggregate Glue Components of Moth-Specialist Spiders, Cyrtarachninae
Source: MDPI journal article supplement (doi:10.3390/biomimetics9050256), 2024-04-23
Supplement: s1 [file s1]

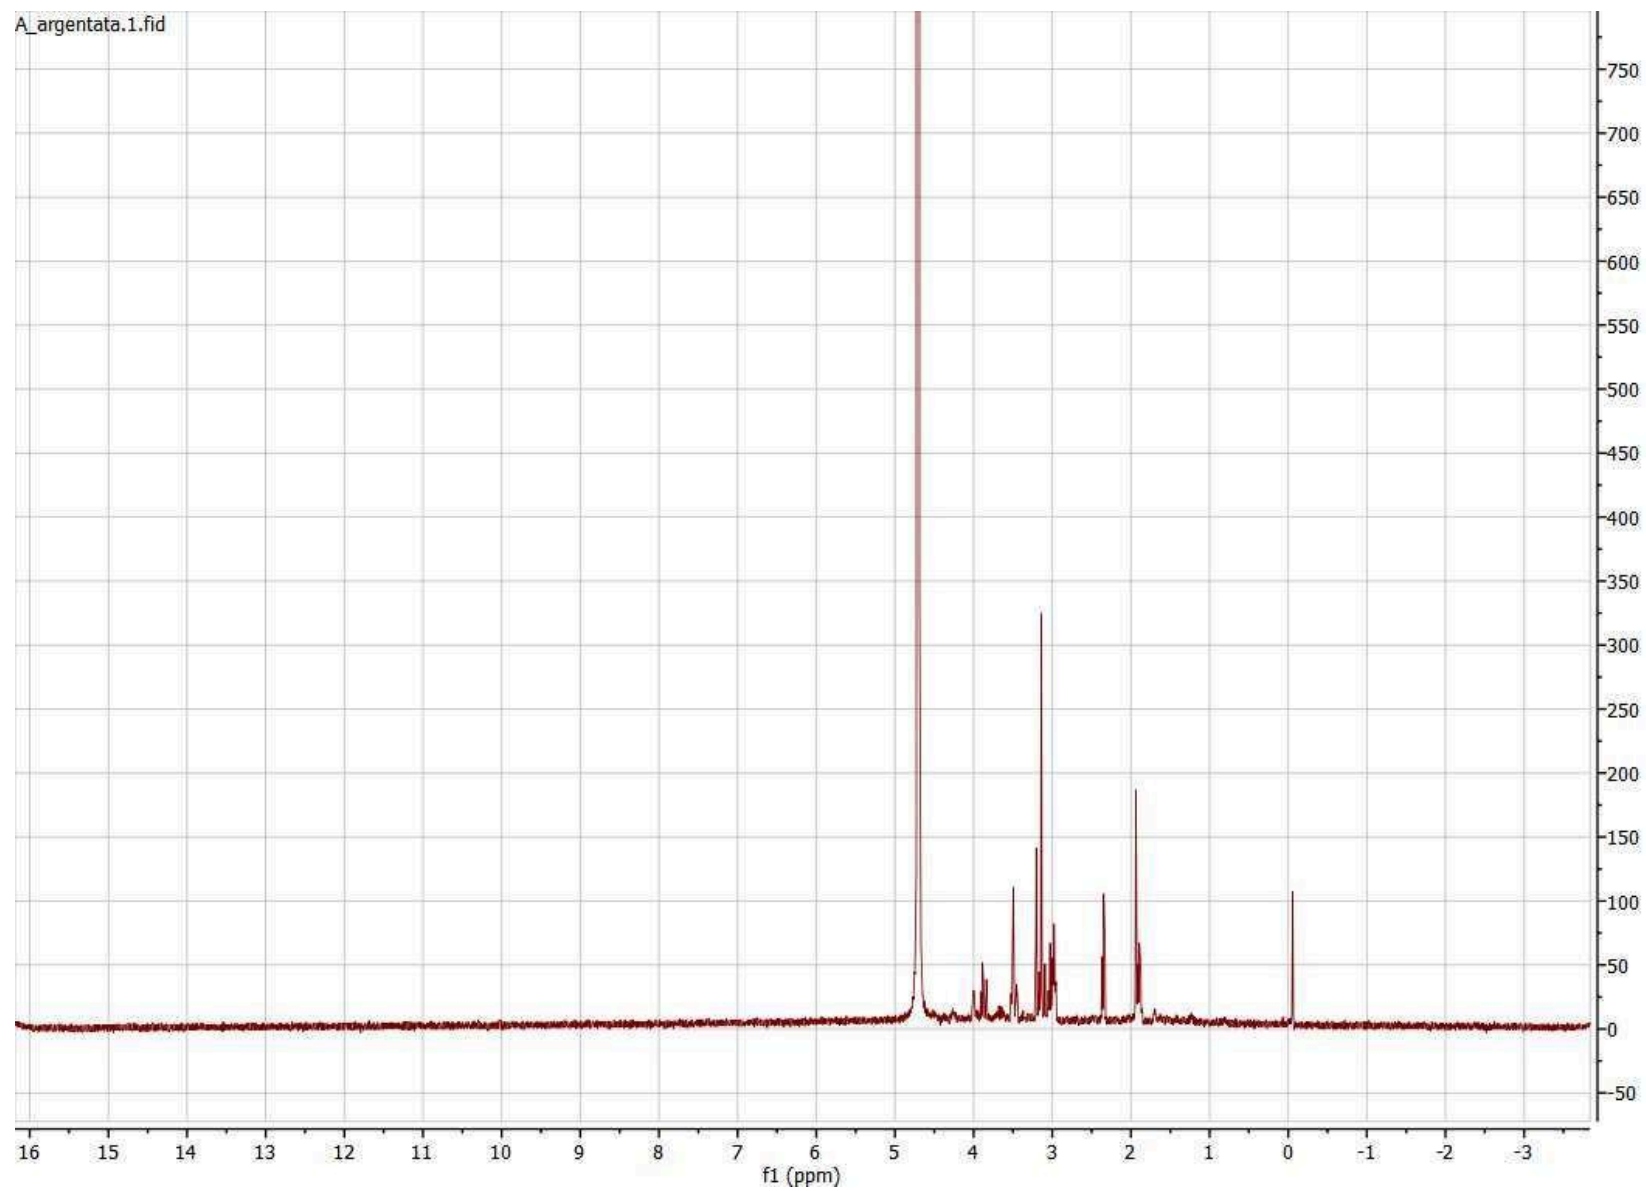

***Argiope Argentata* - Survey Spectra**

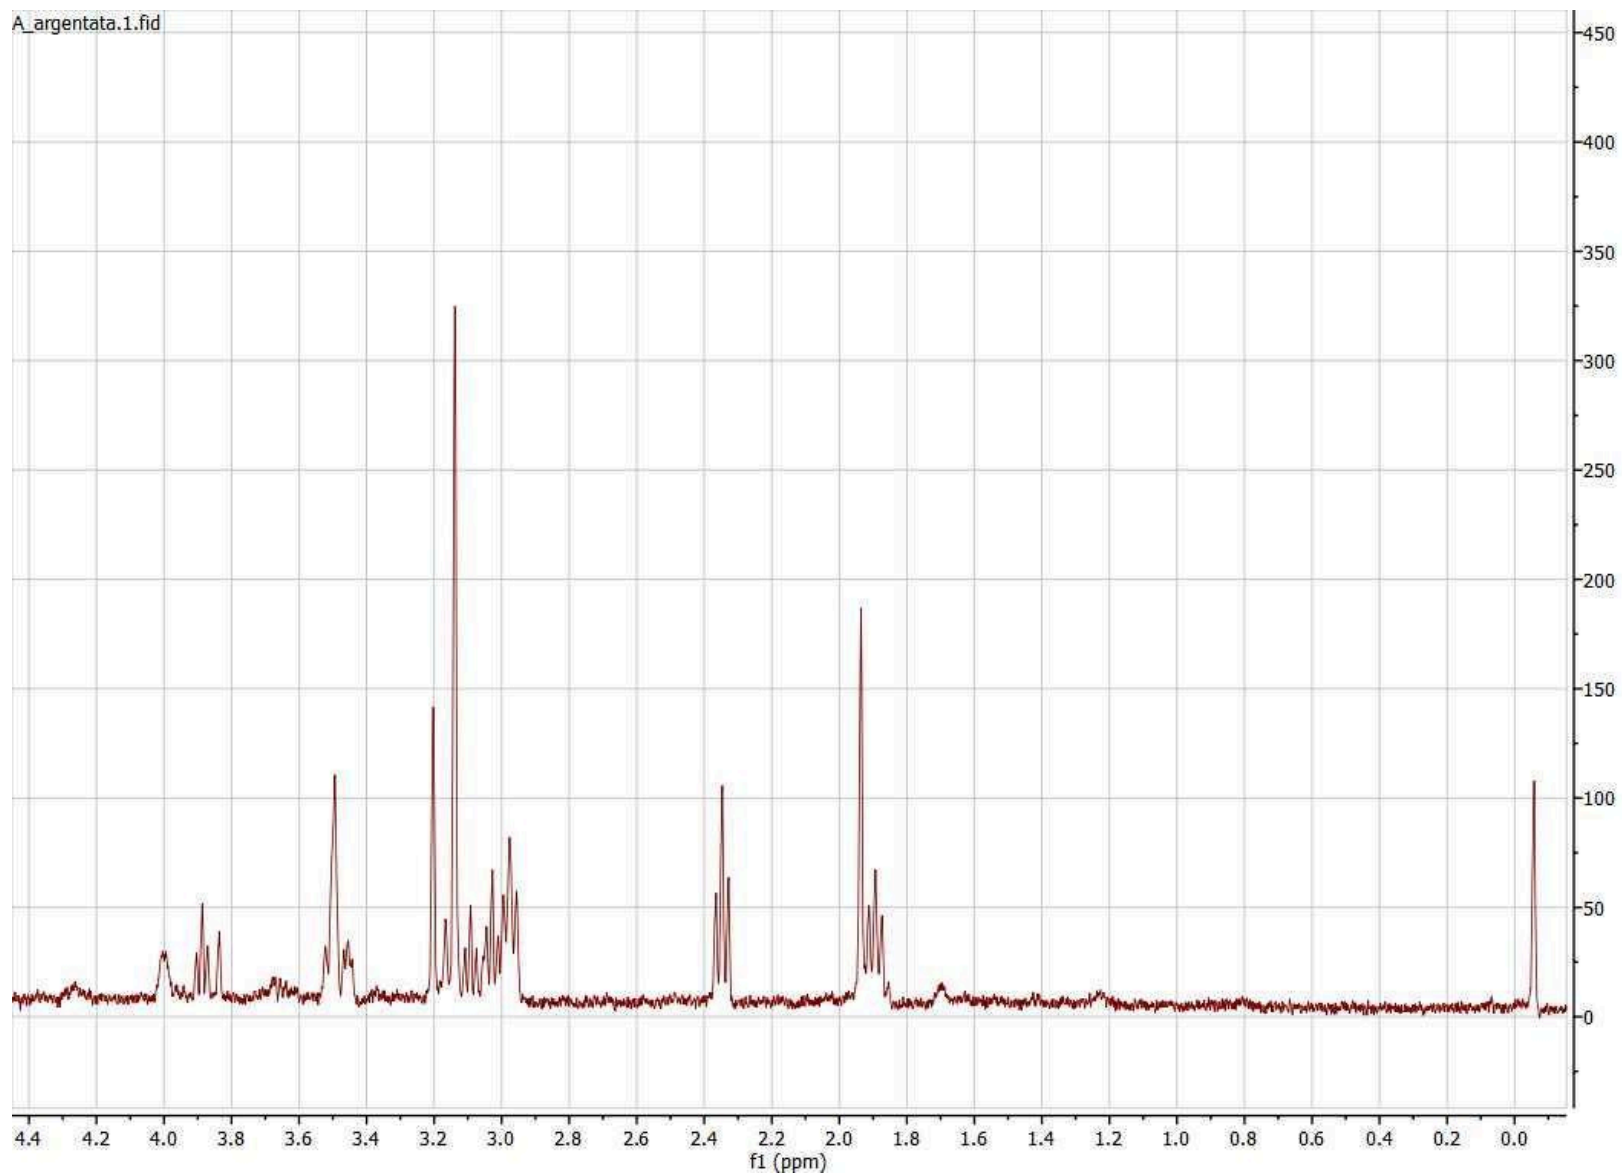

***Argiope Argentata* - Extended Spectra**

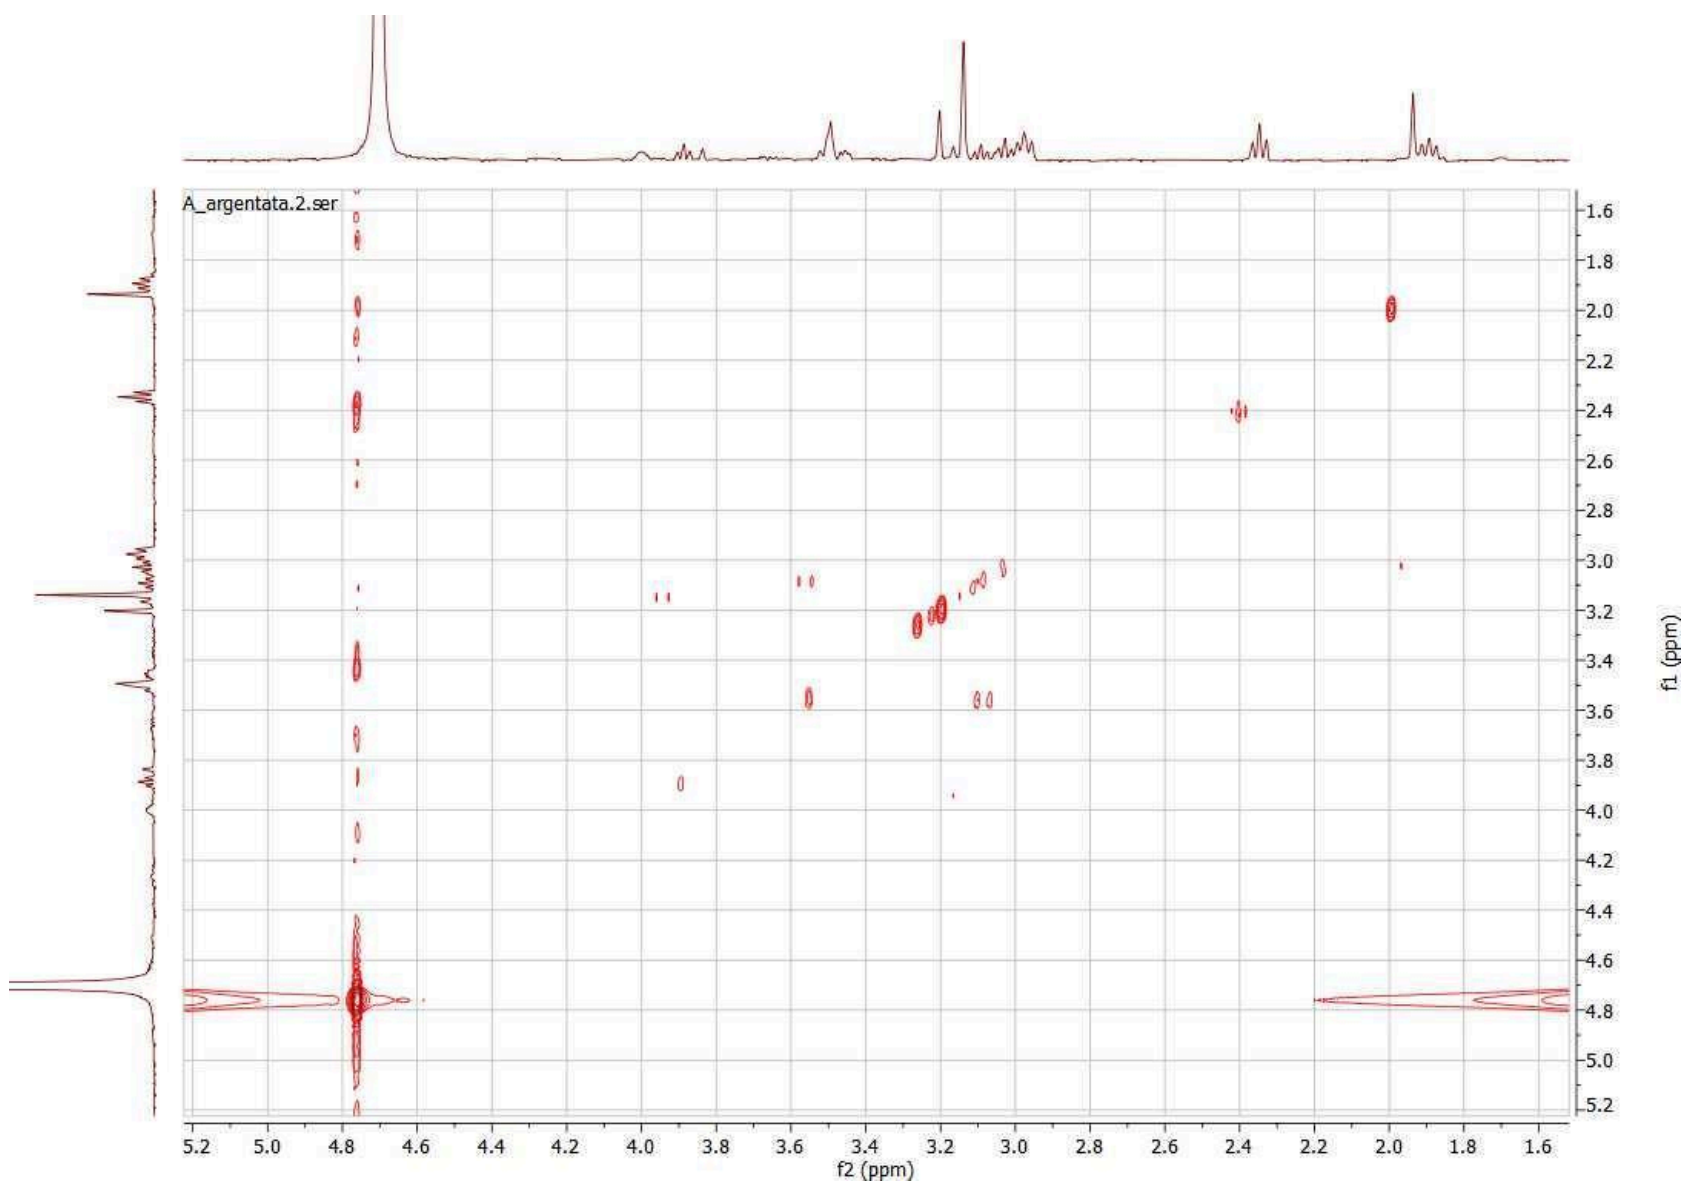

***Argiope Argentata* - 2D COSY**

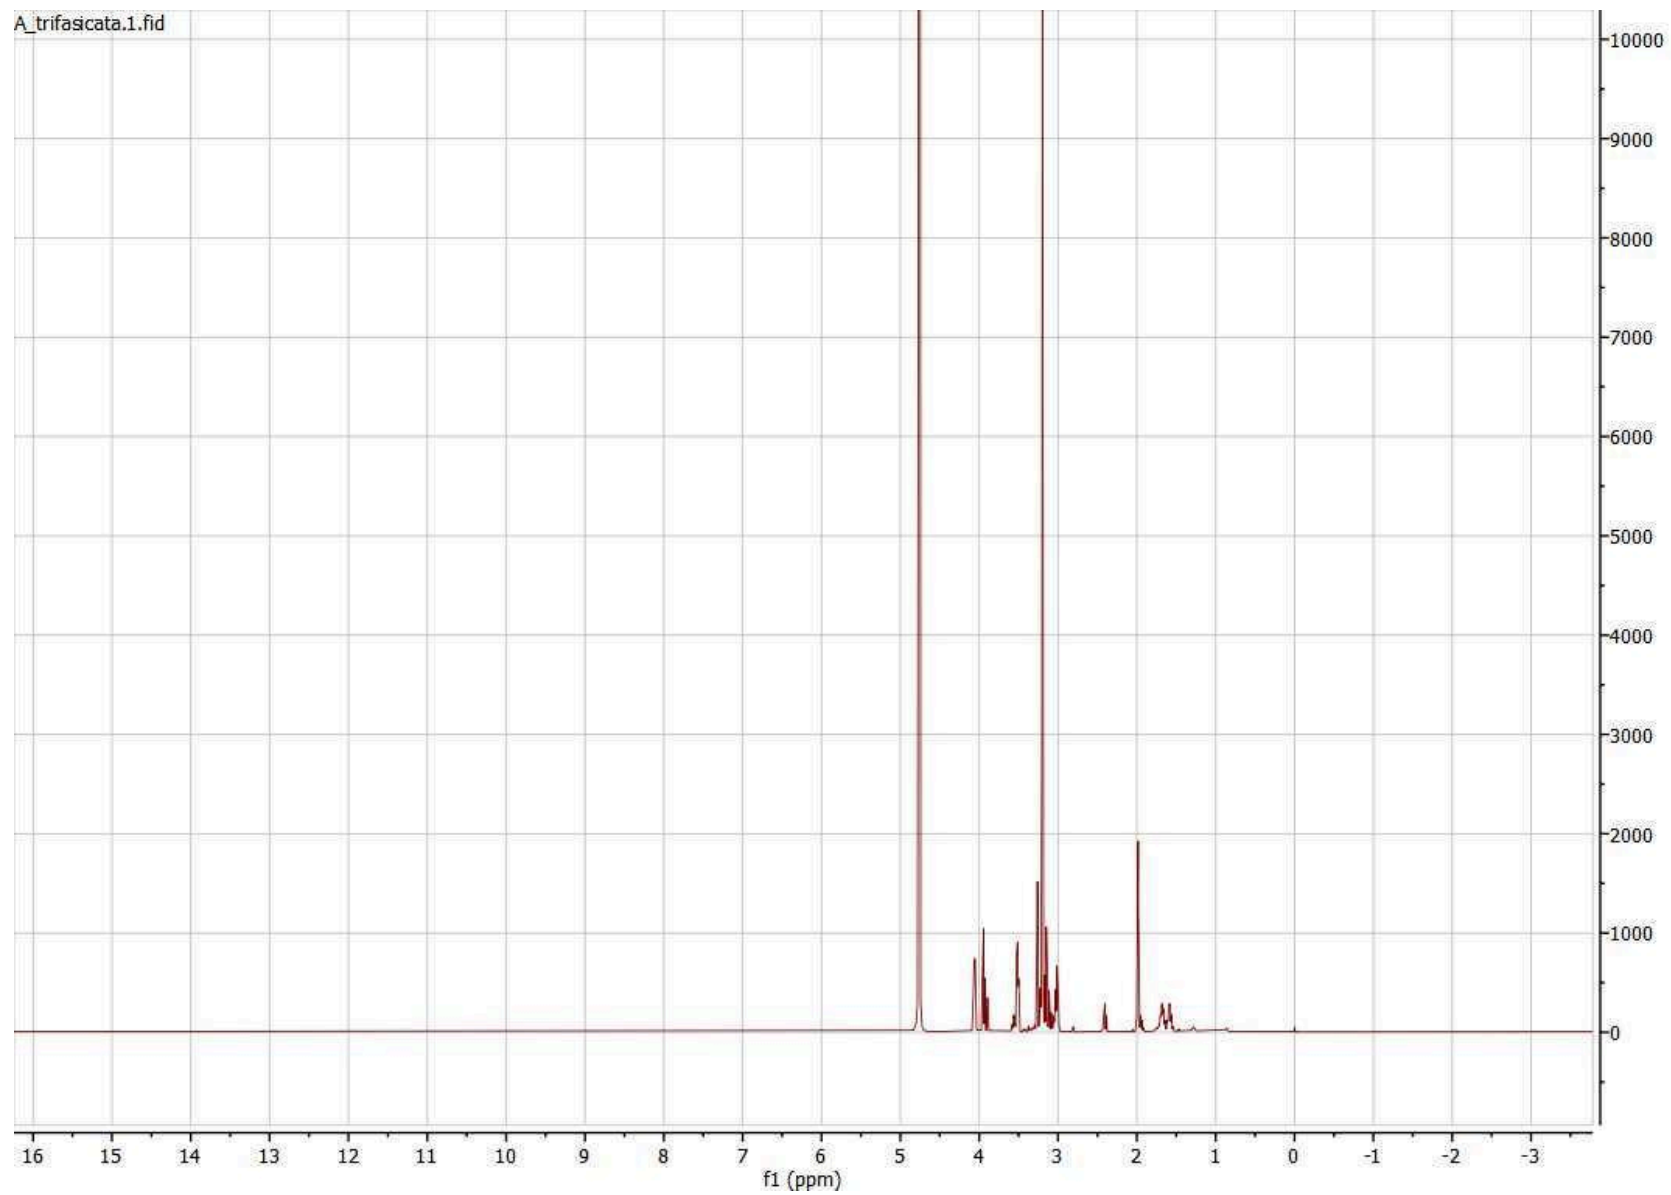

***Argiope trifasciata* - Survey Spectra**

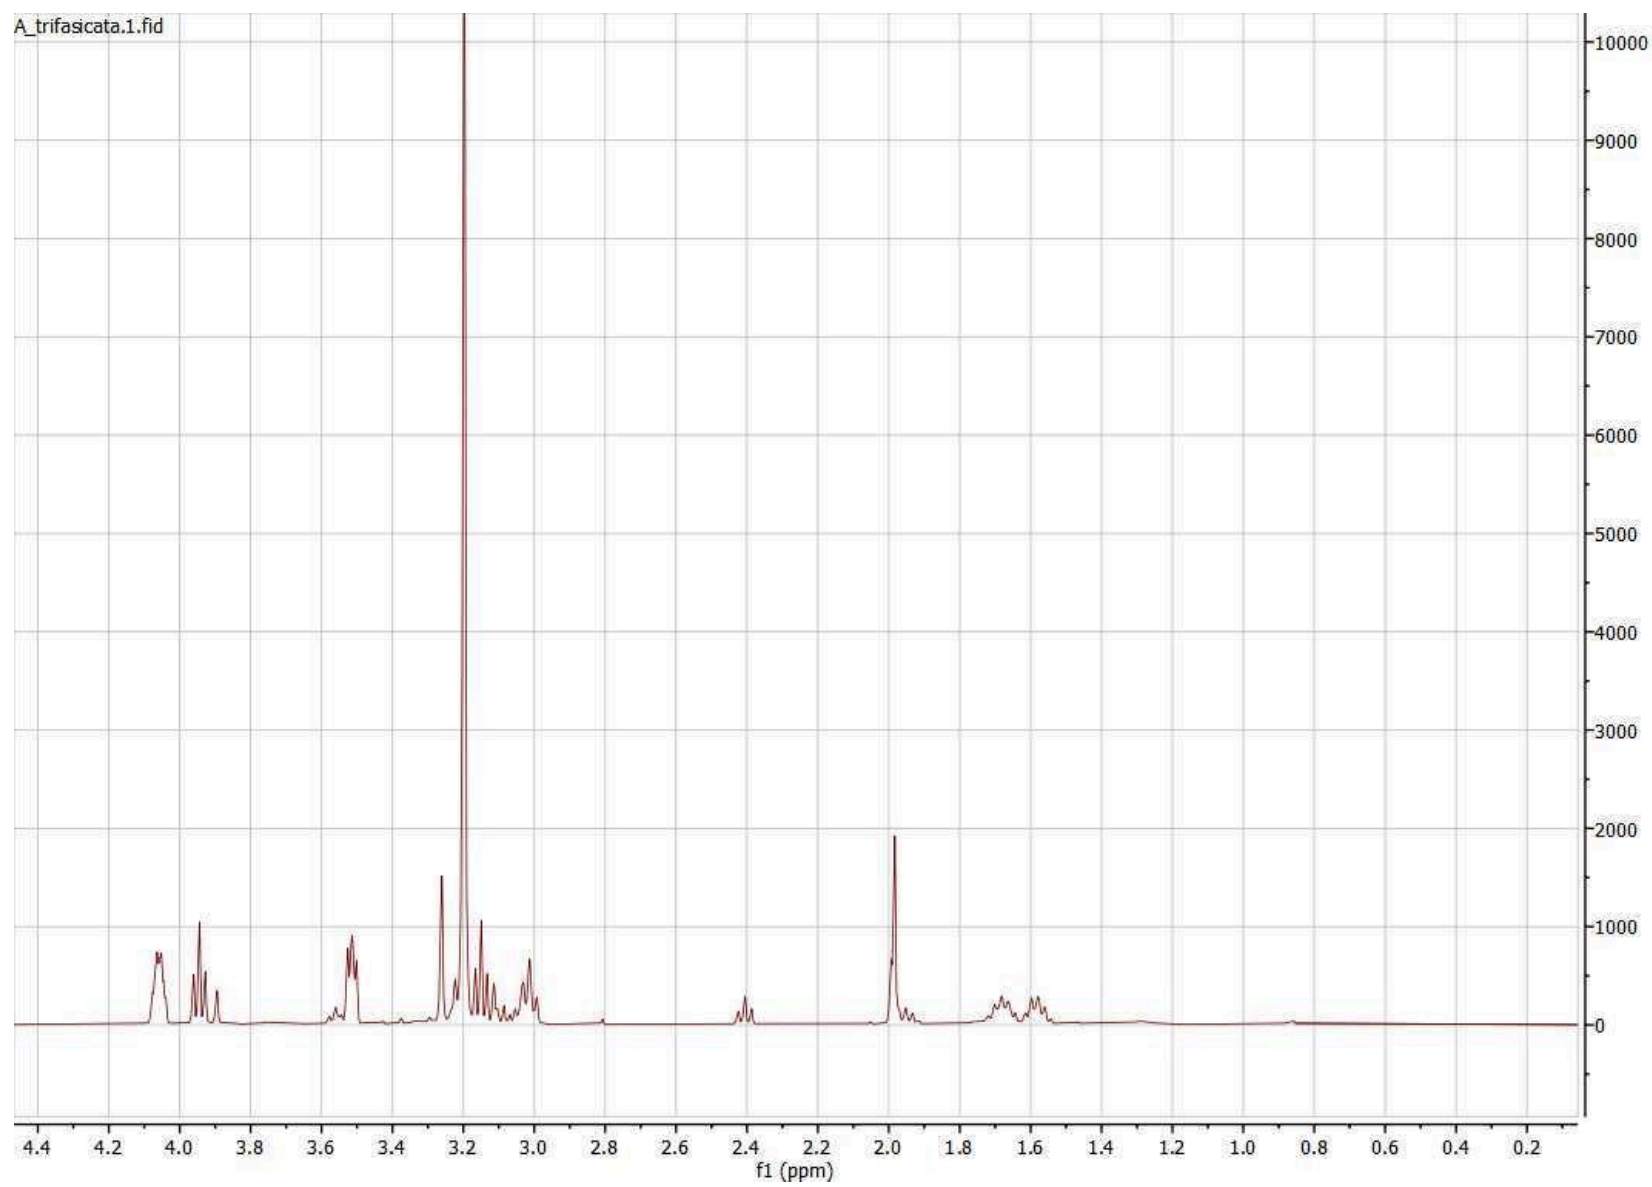

***Argiope trifasciata* - Extended Spectra**

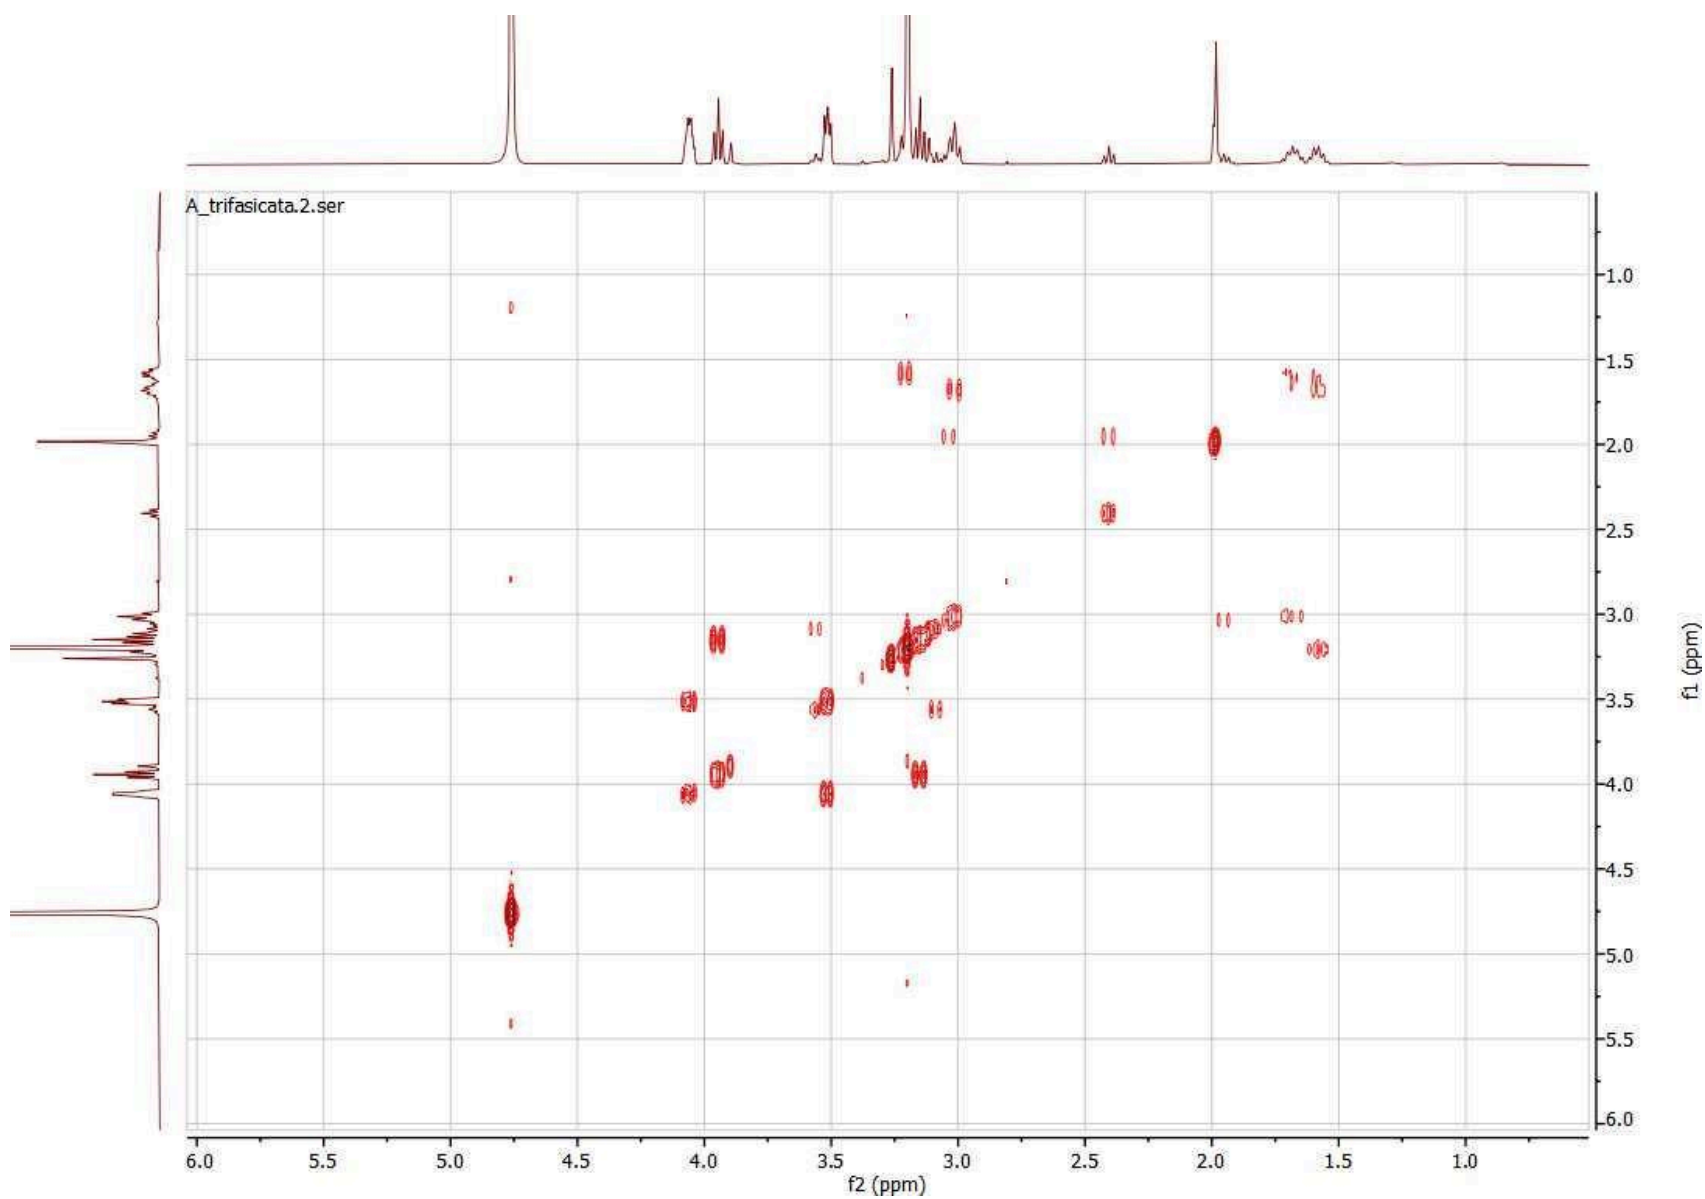

*Argiope trifasciata* - 2D COSY

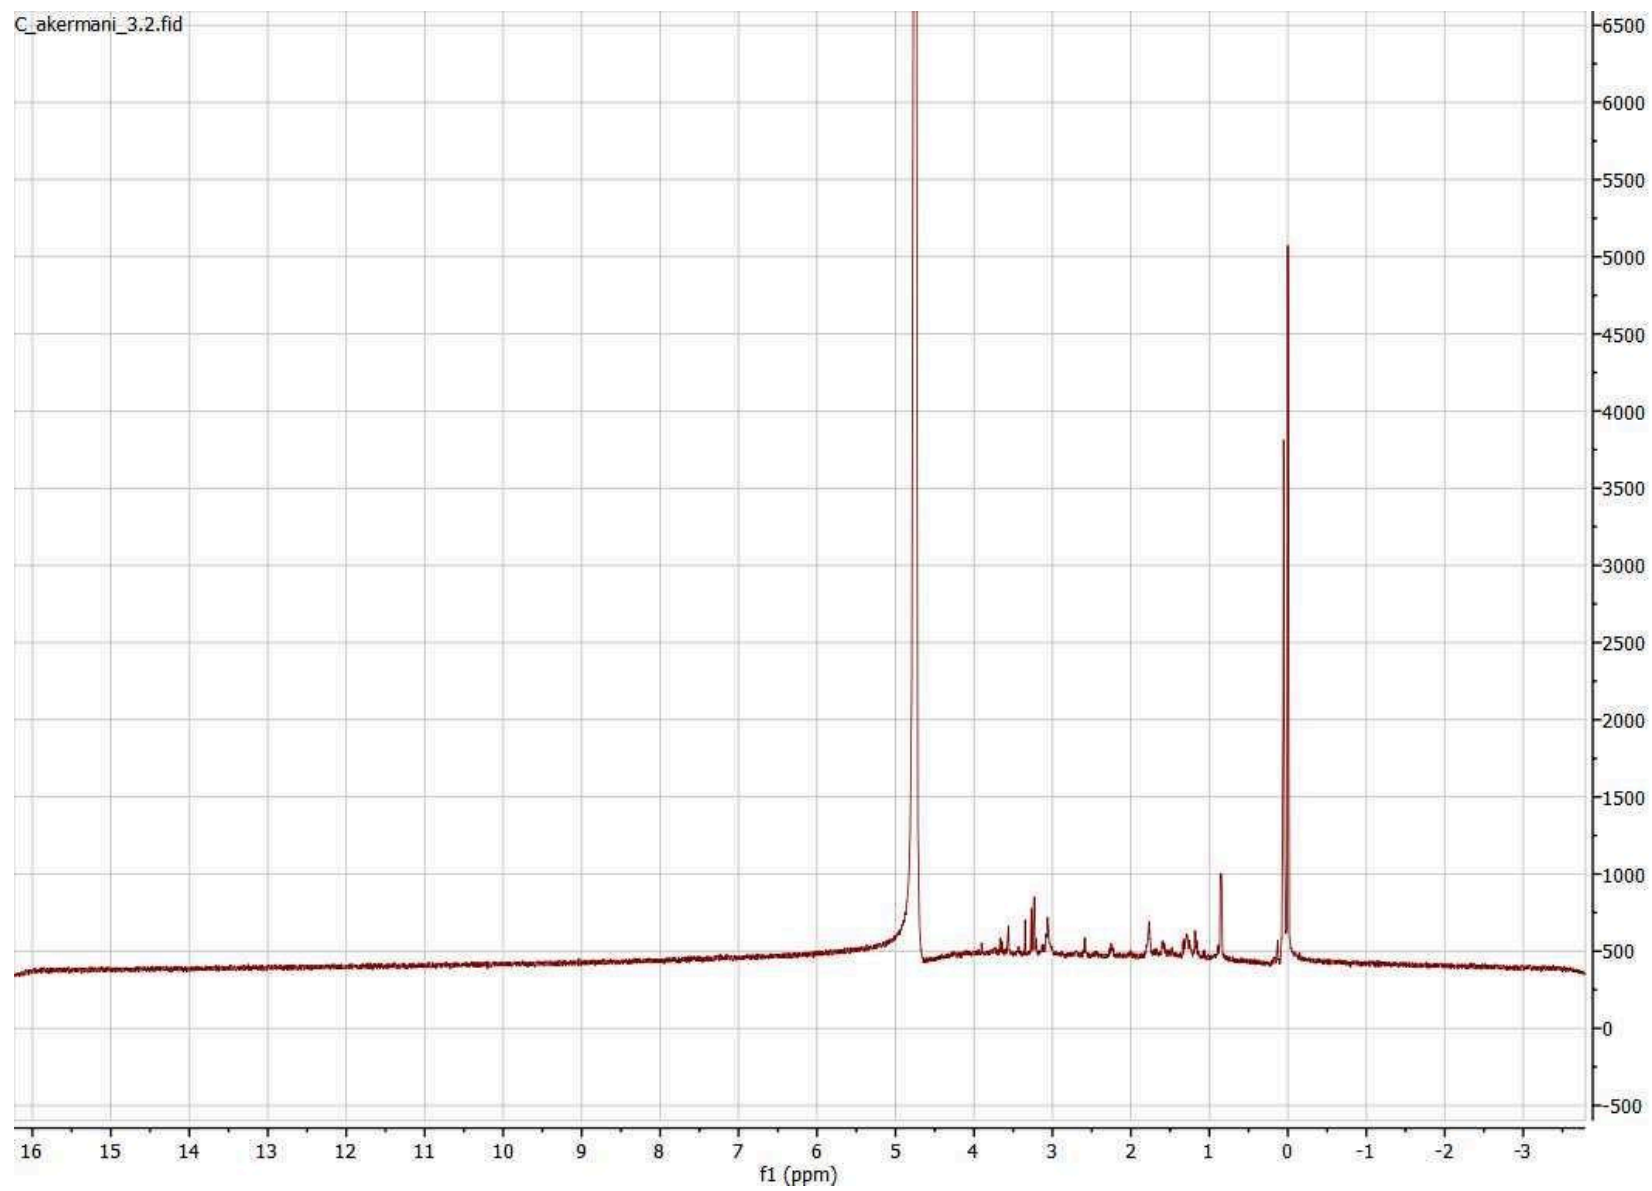



***Cladomelea akermani* - Survey Spectra**

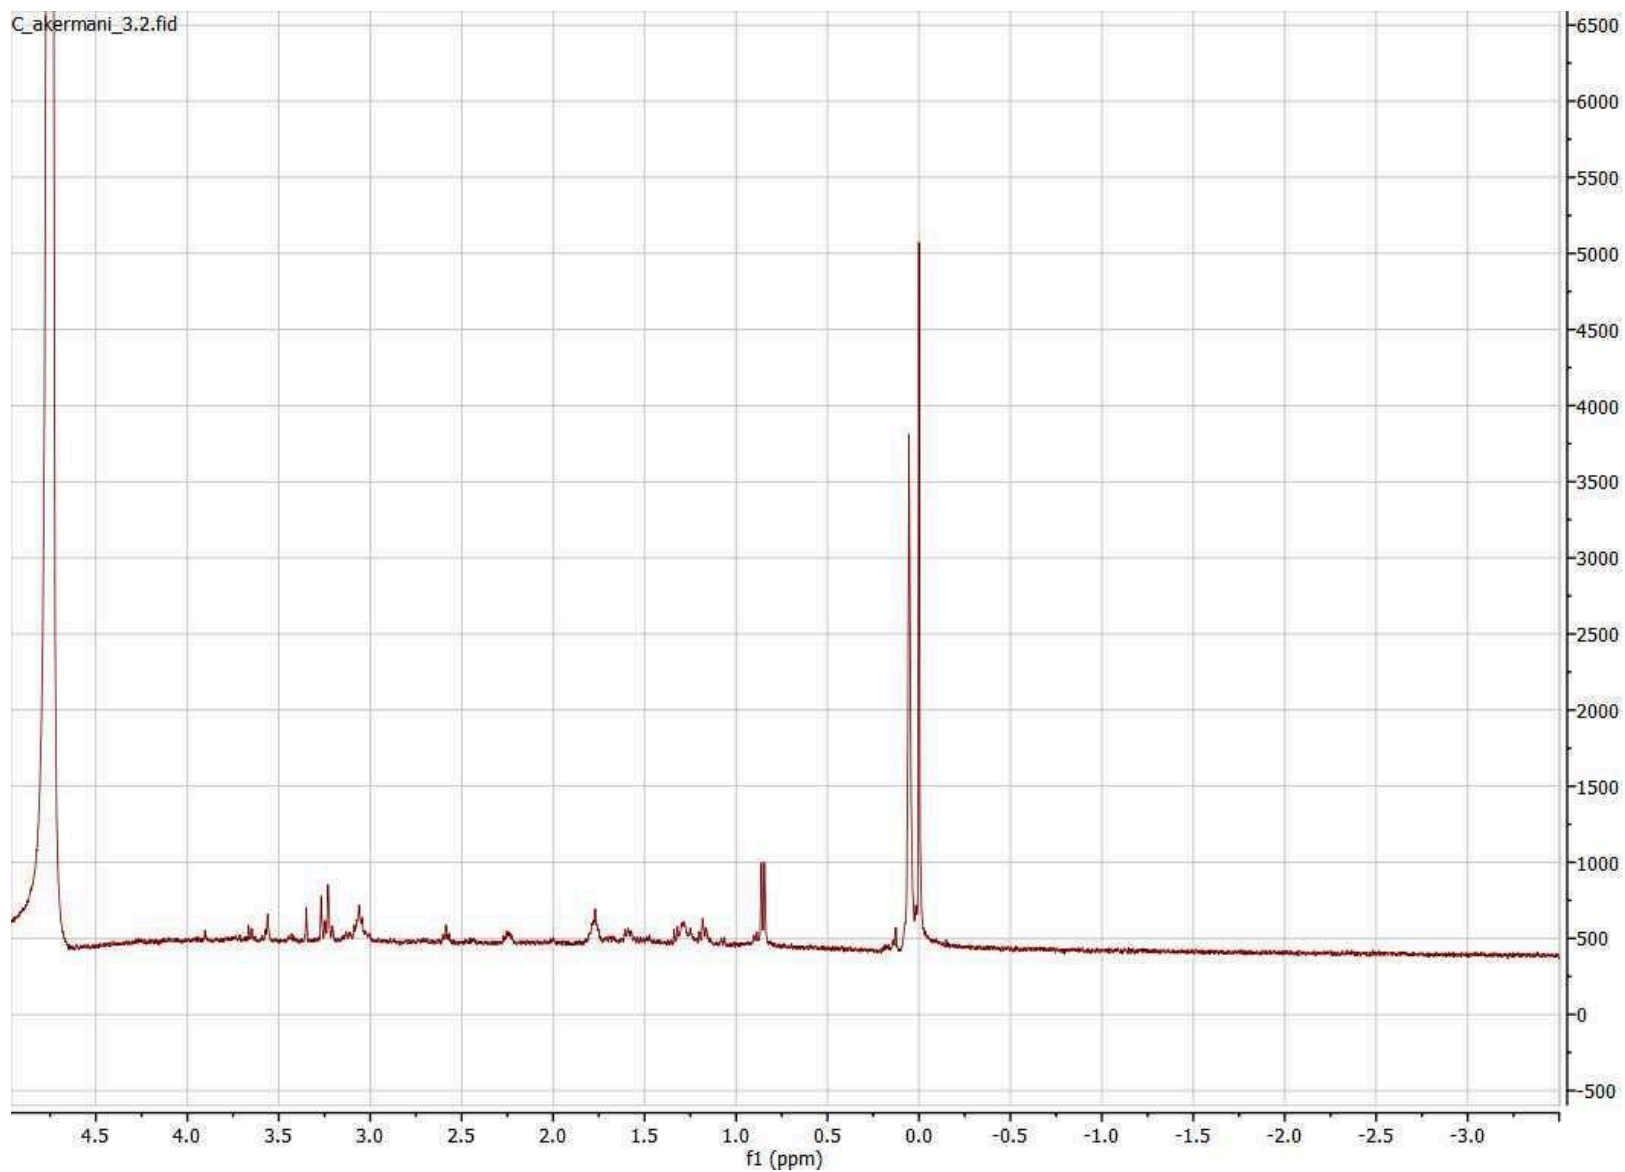

***Cladomelea akermani* - Extended Spectra**

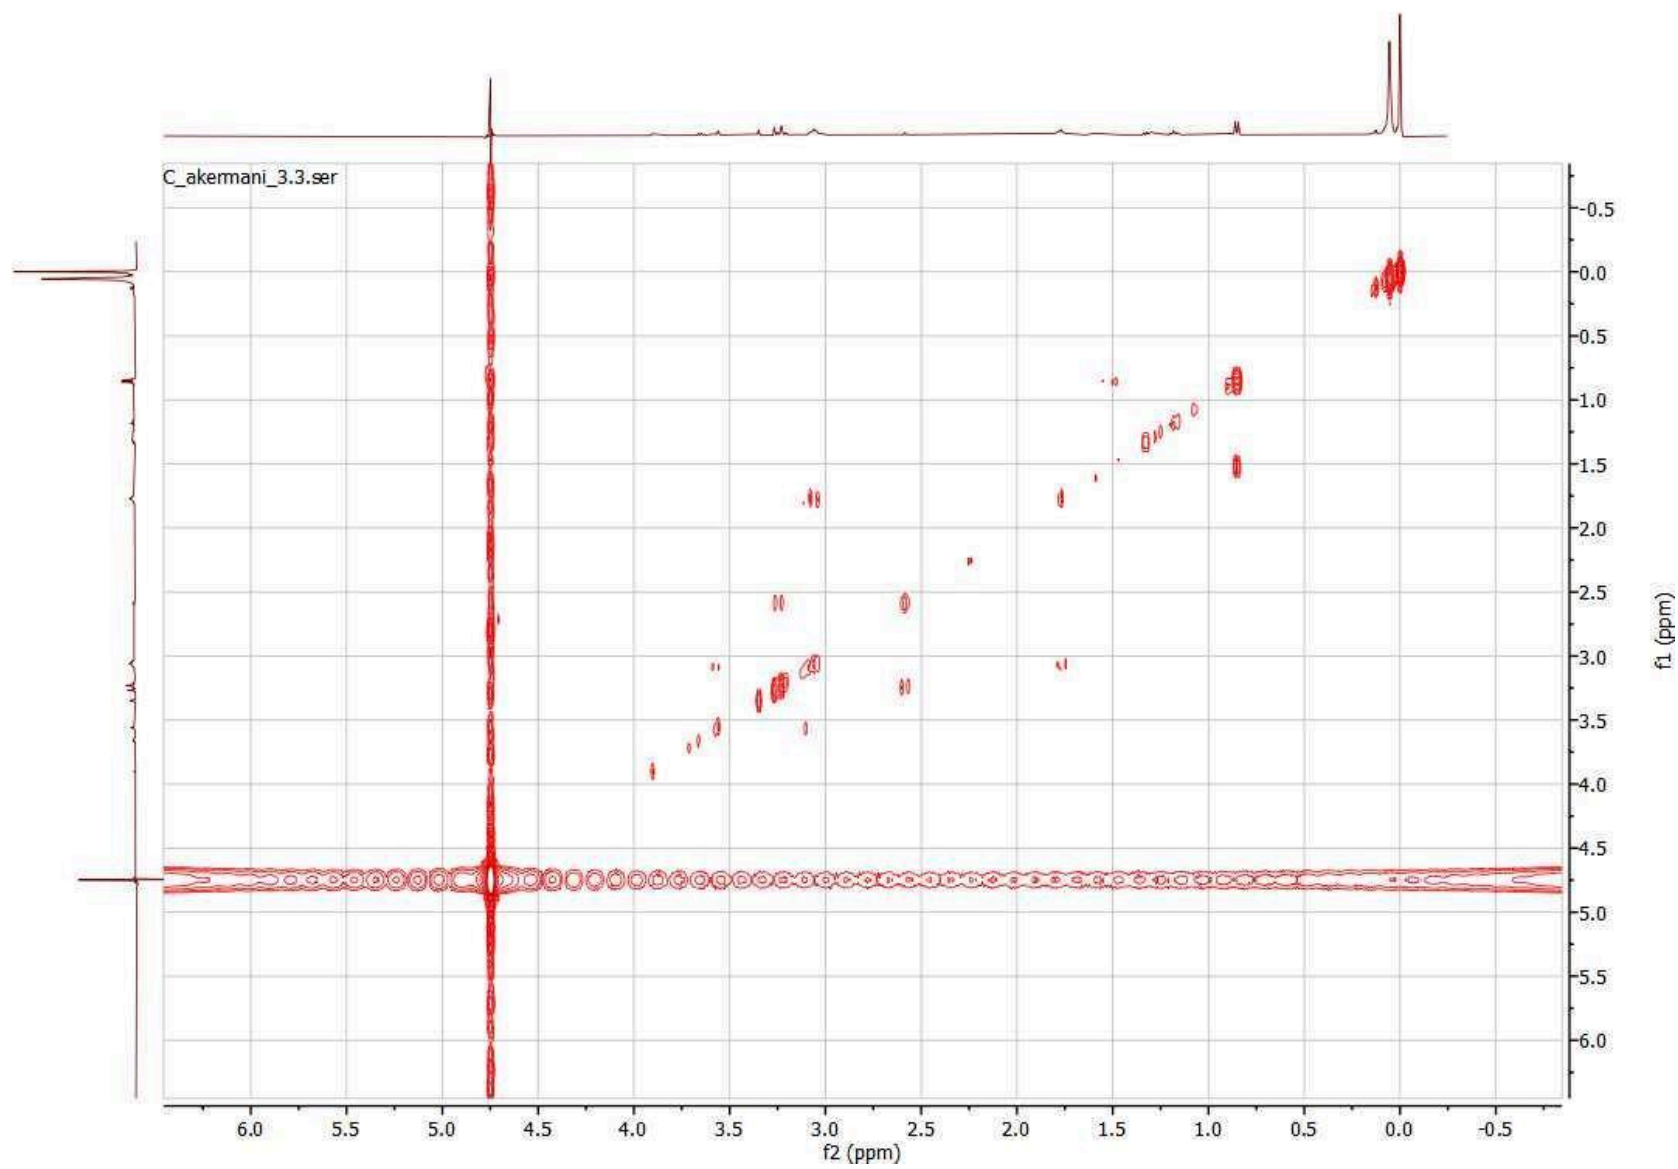

***Cladomelea akermani* - 2D COSY**

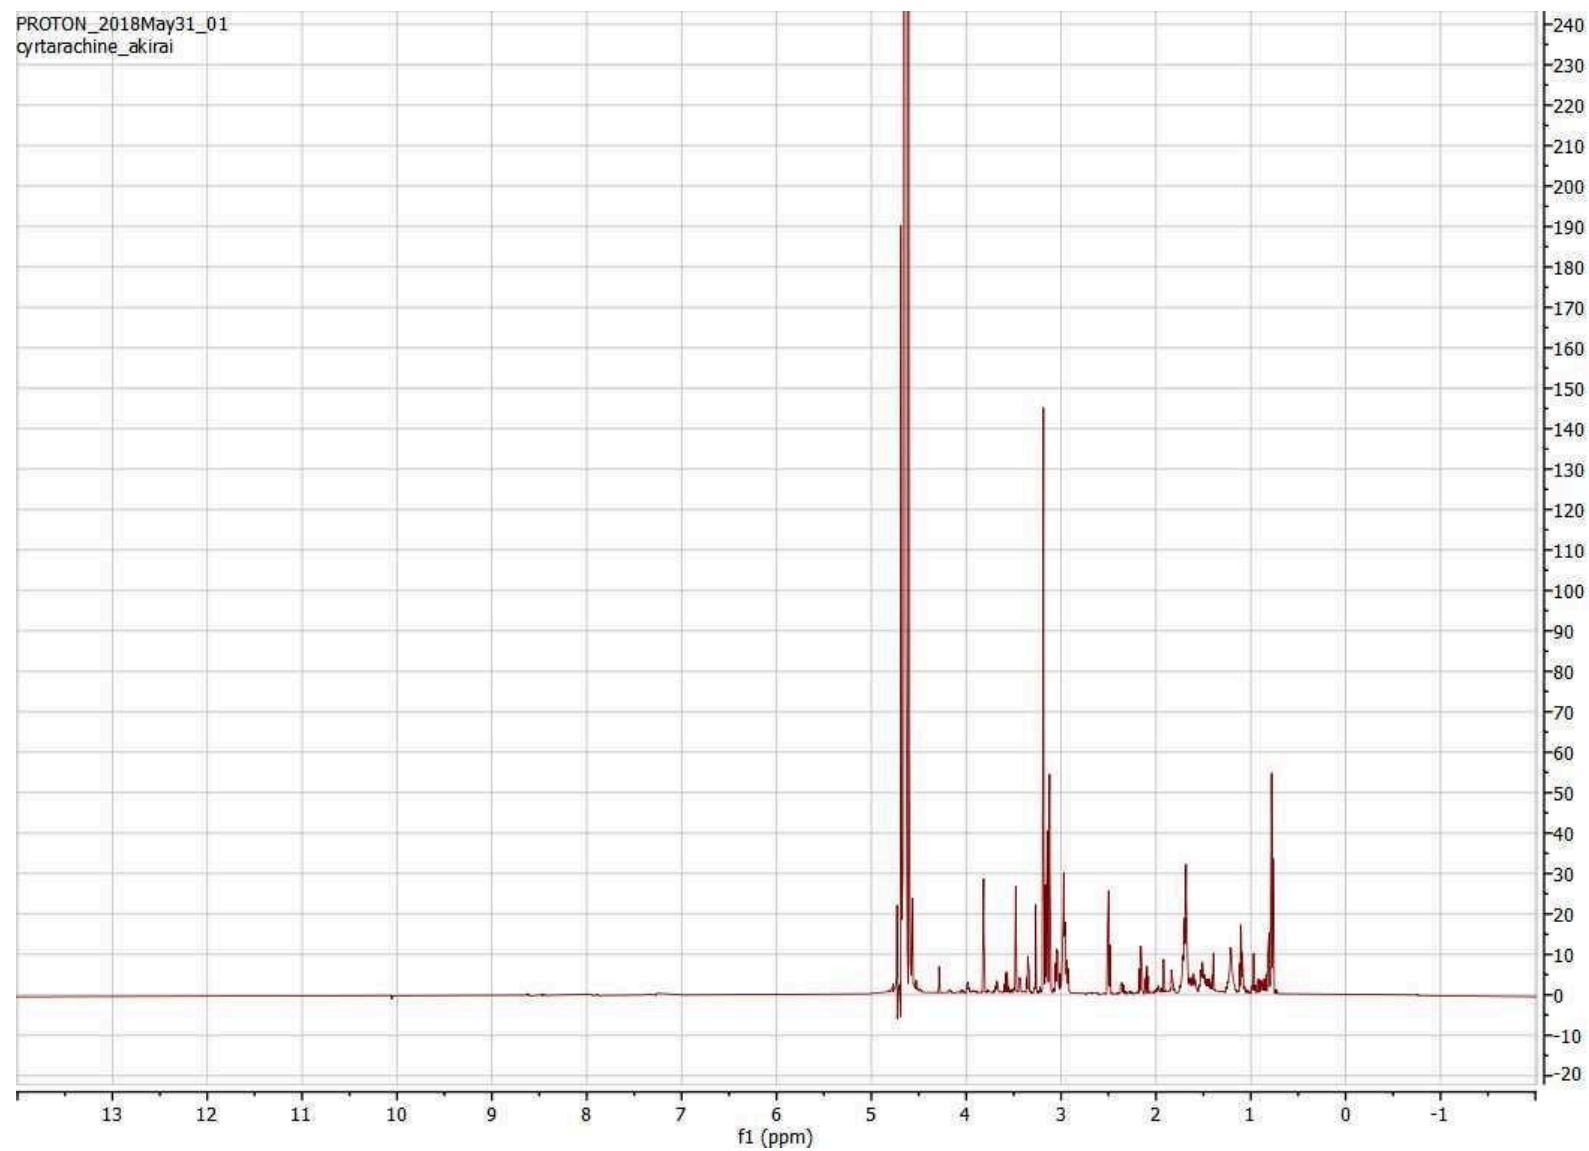

# *Cyrtarachne akirai* – Survey Spectra

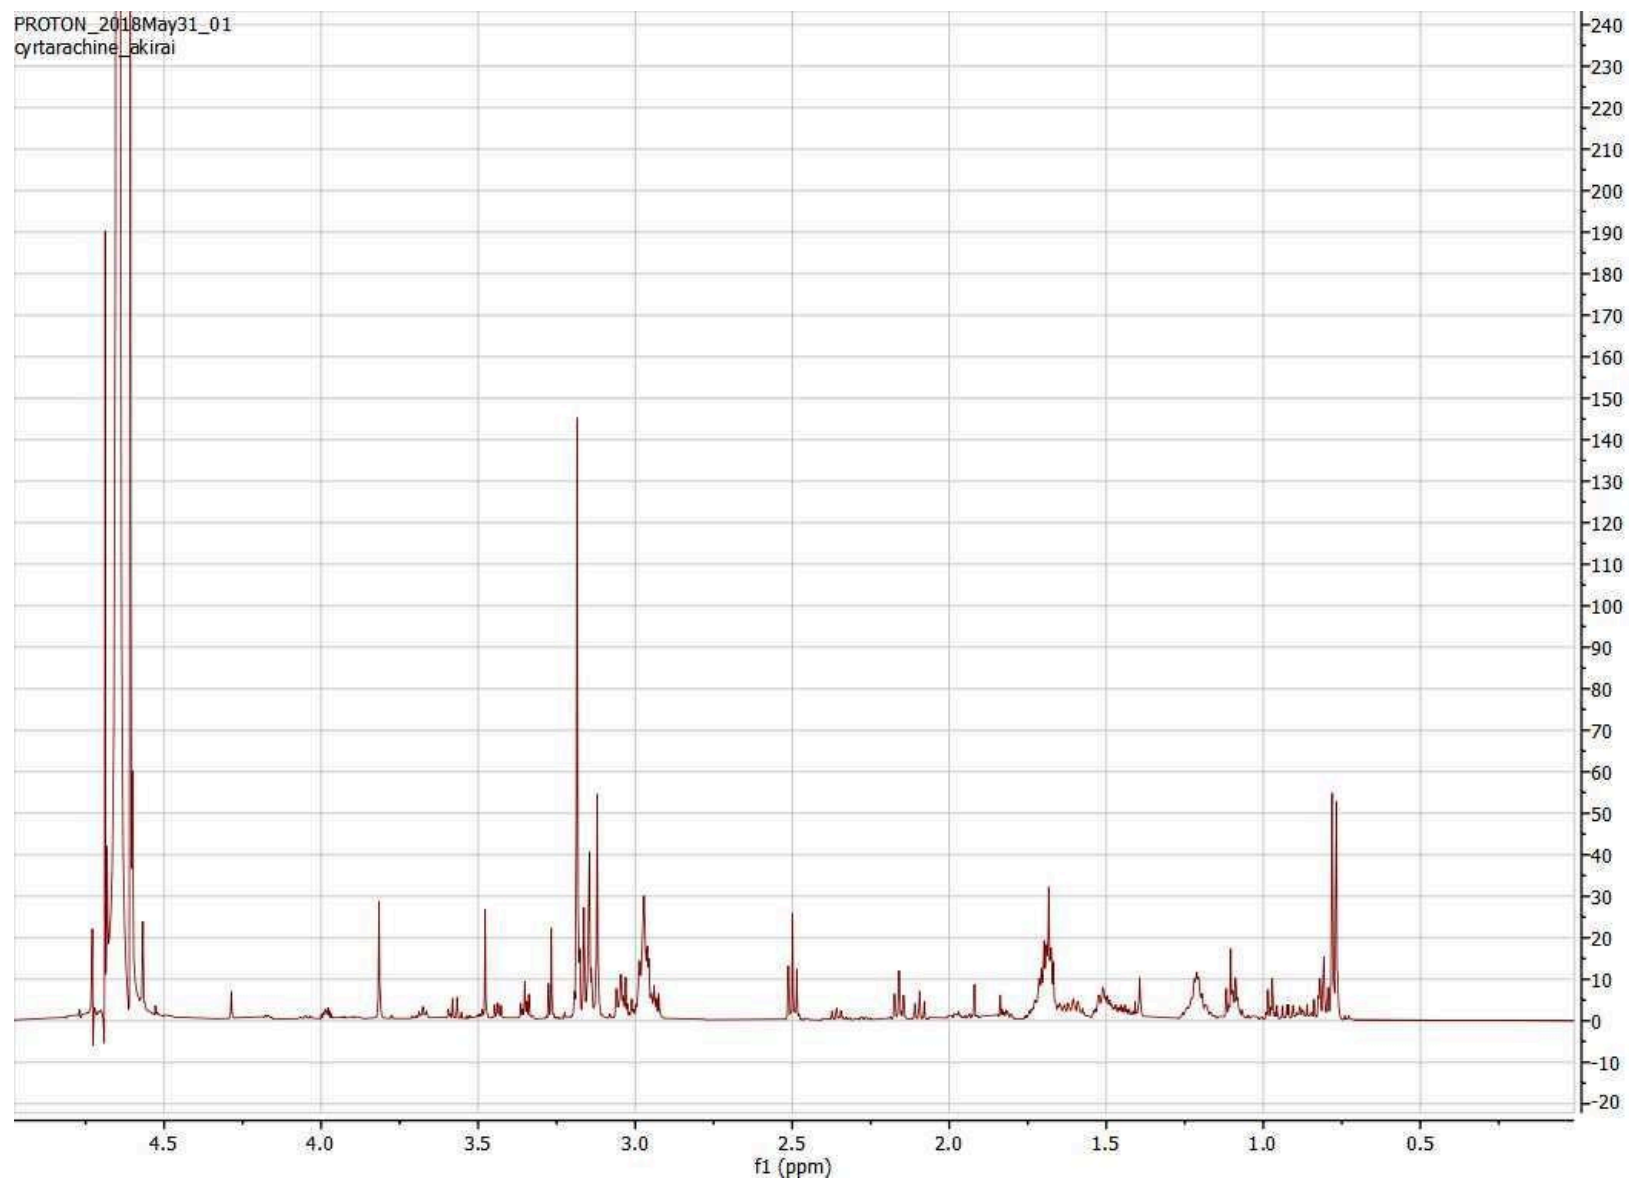

# *Cyrtarachne akirai* – Extended Spectra

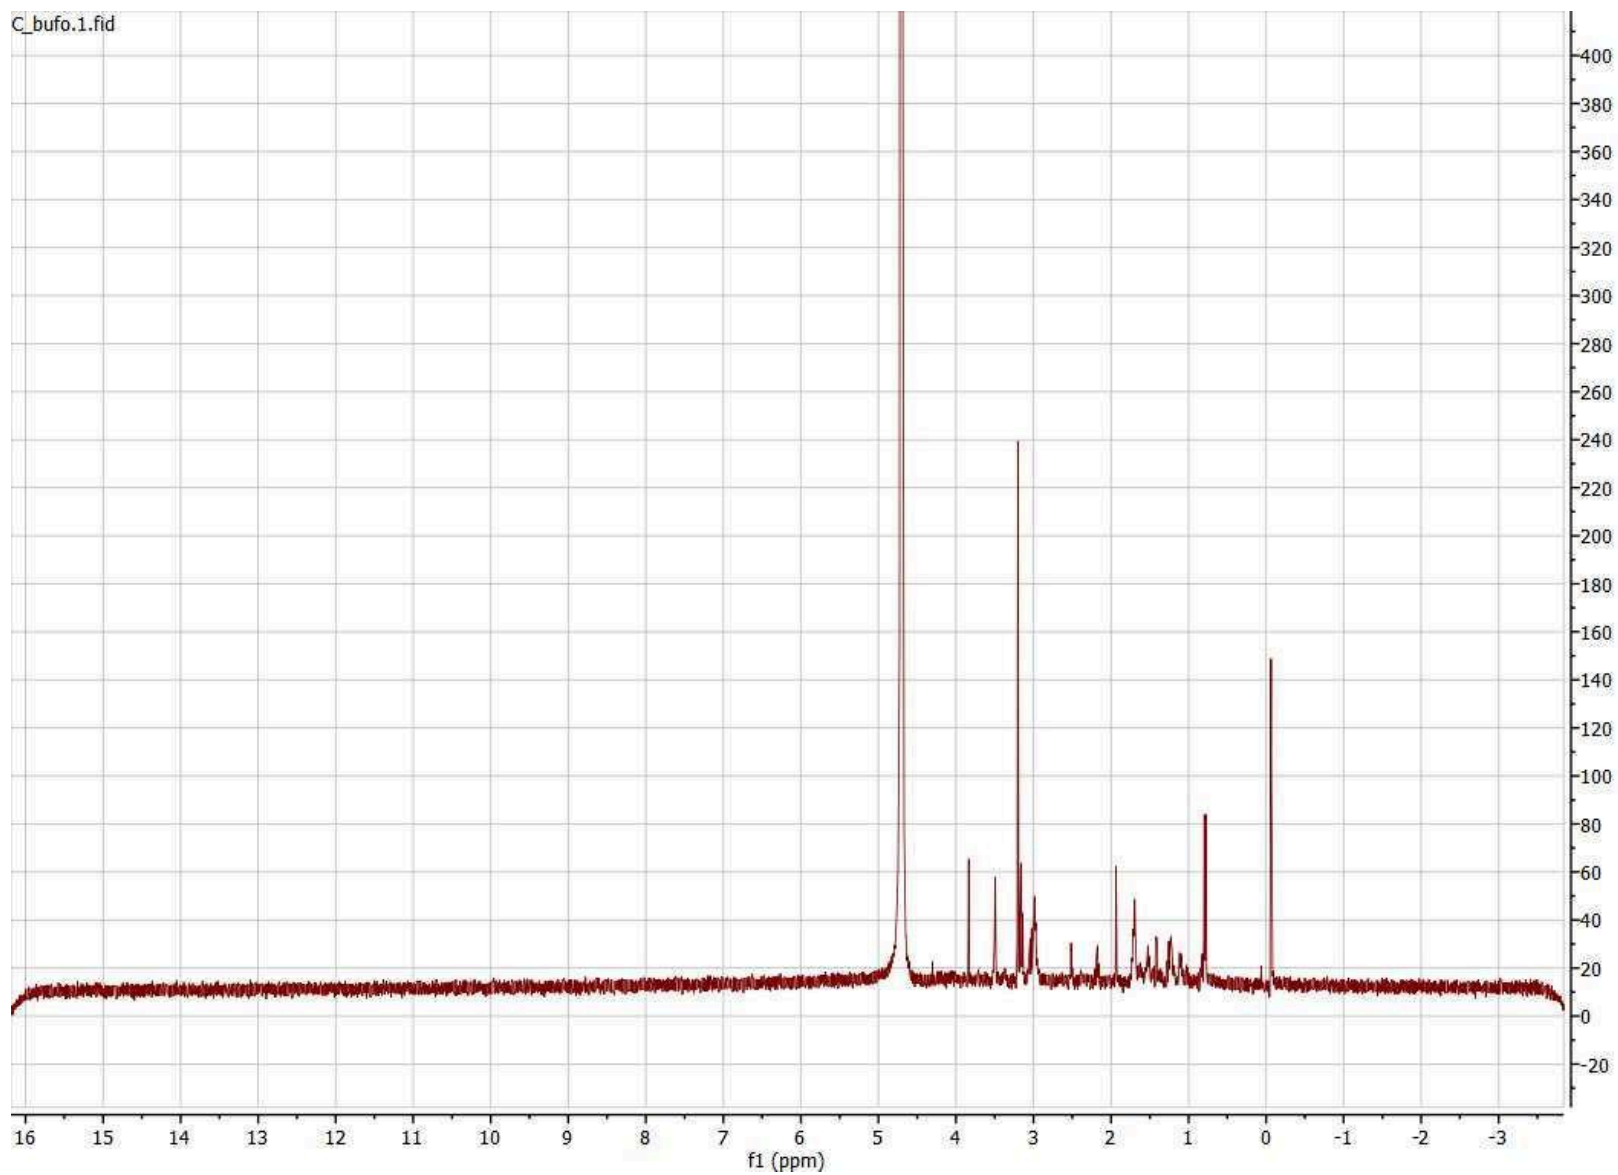

# *Cyrtarachne bufo* – Survey Spectra

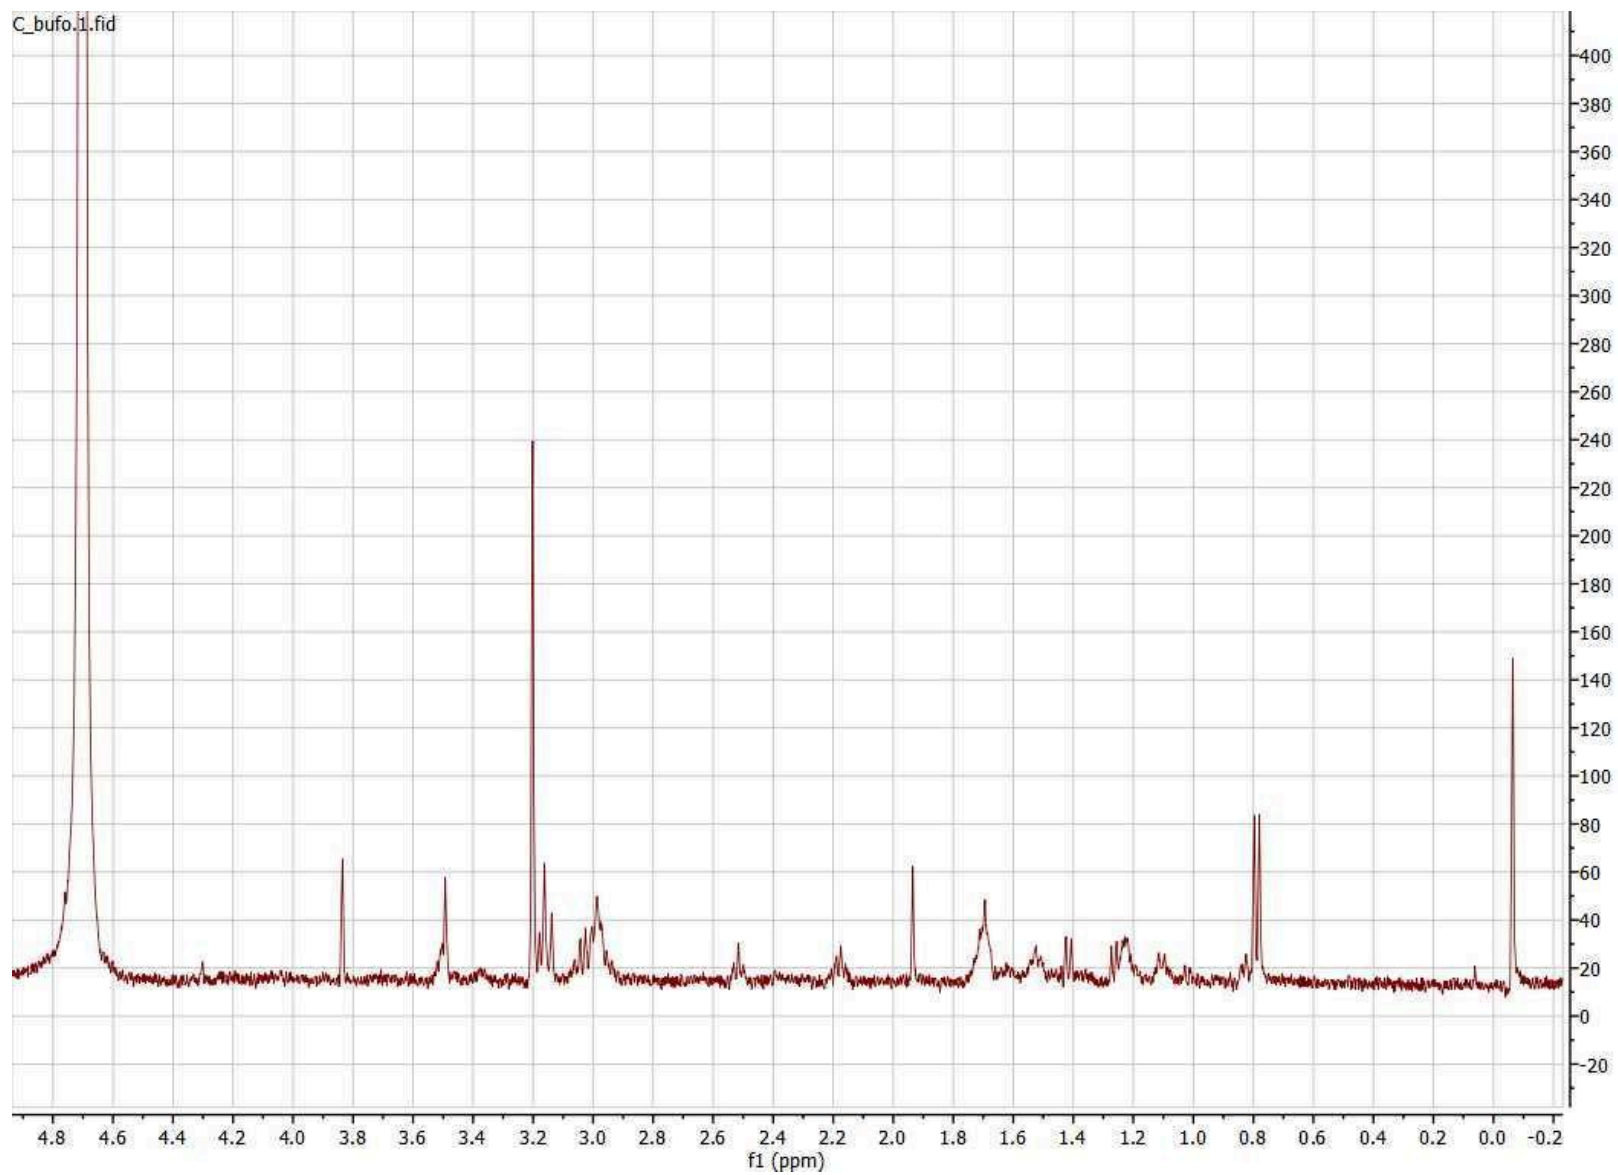

# *Cyrtarachne bufo* – Extended Spectra

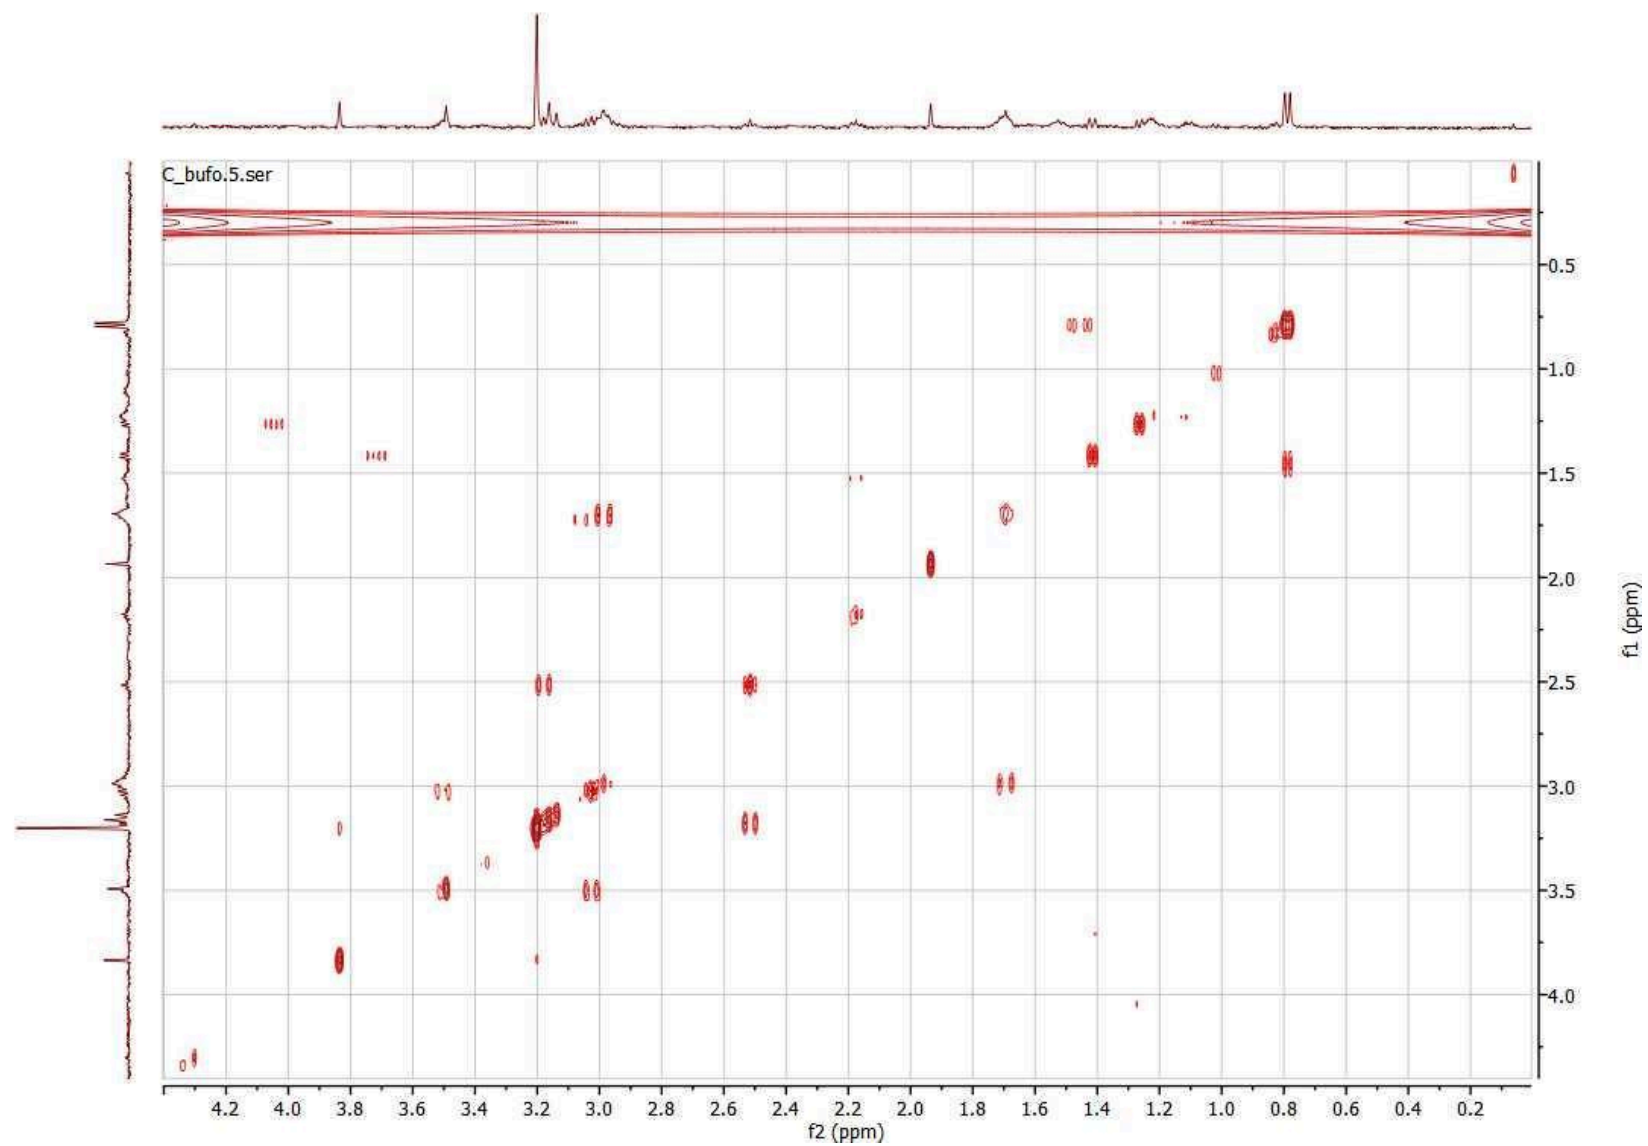

***Cyrtarachne bufo* – 2D COSY**



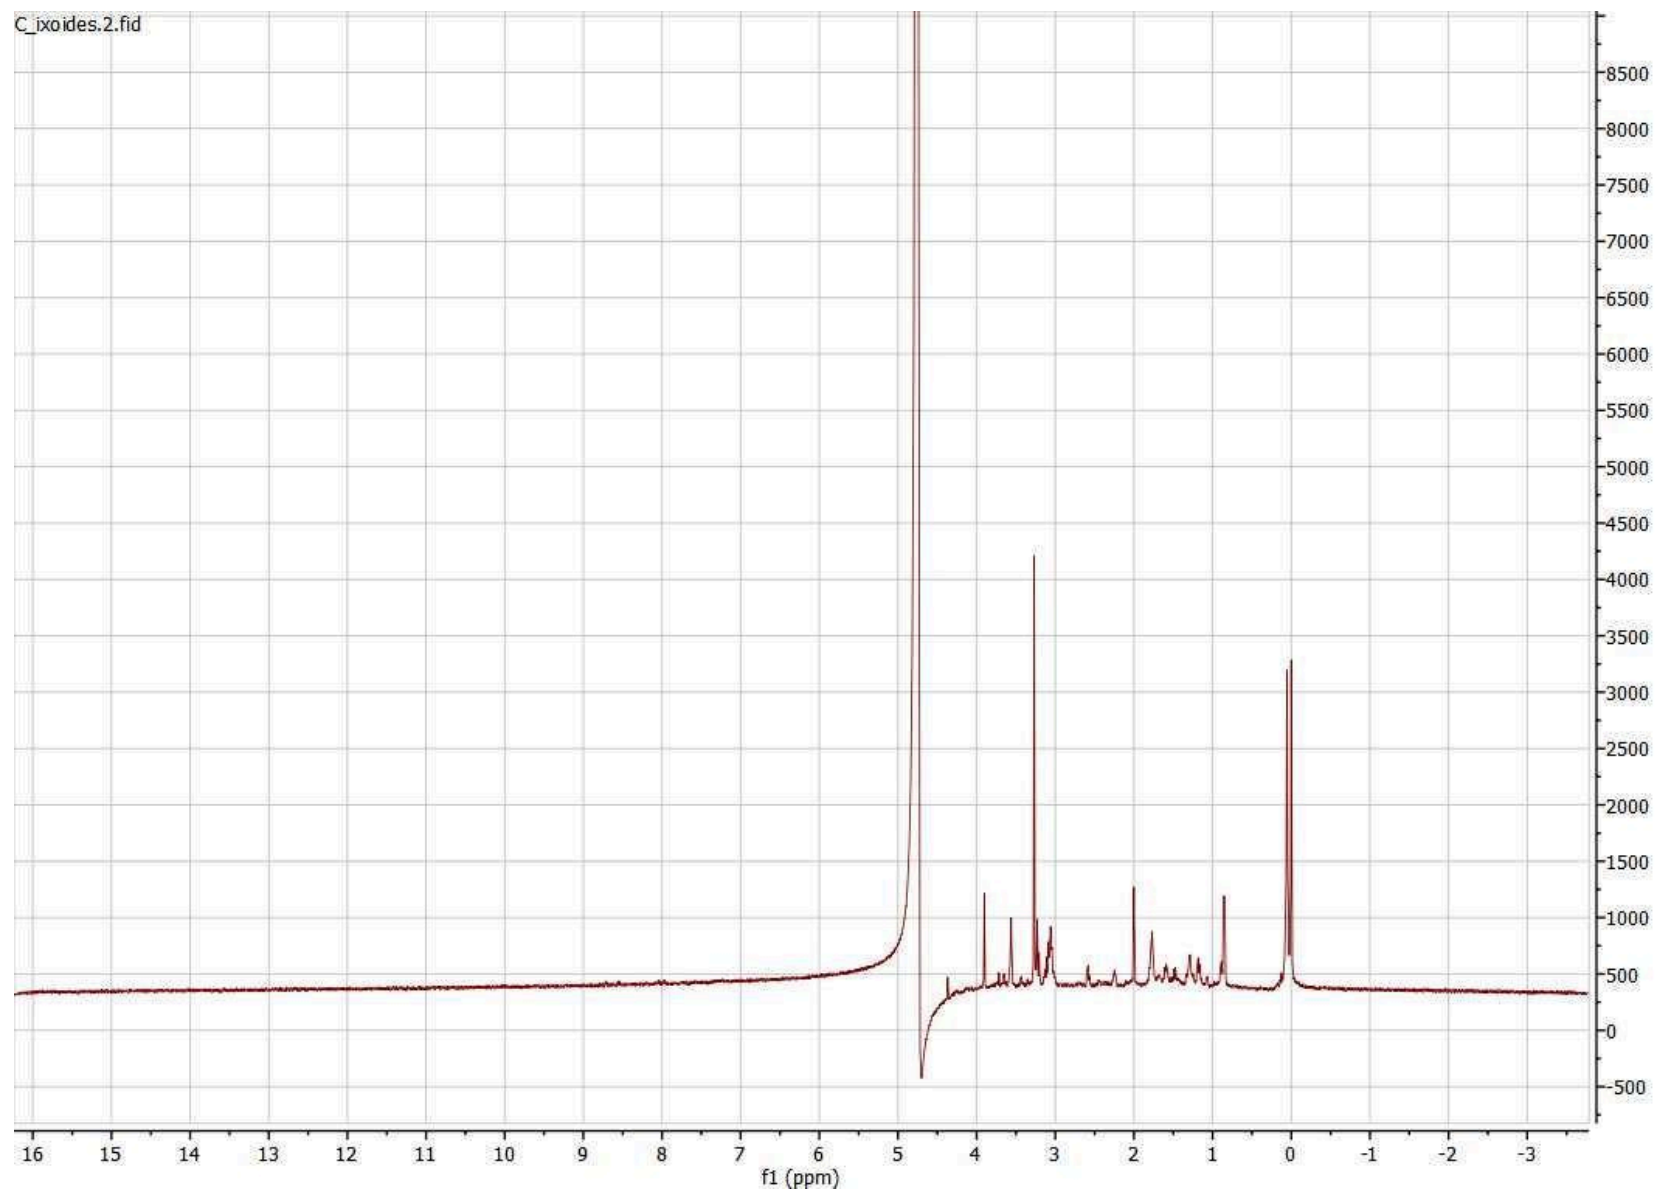

# *Cyrtarachne ixoides* – Survey Spectra

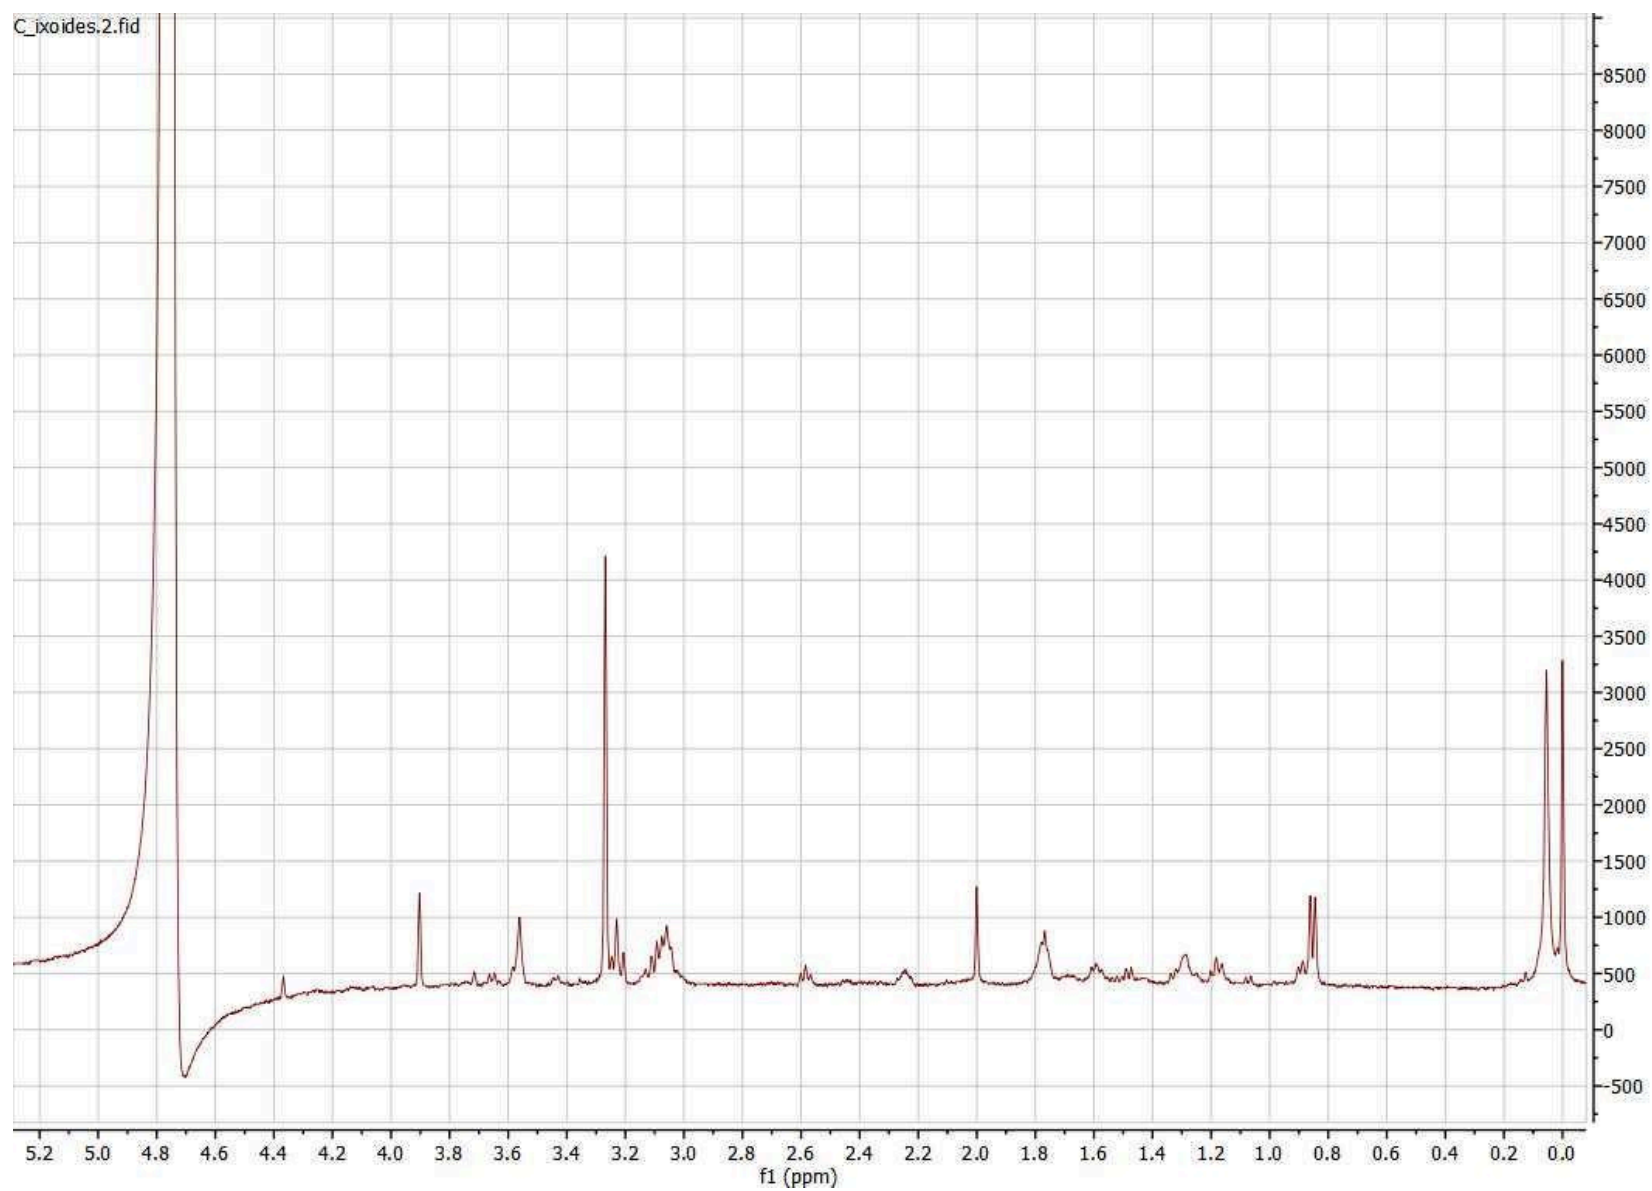

***Cyrtarachne ixoides* – Extended Spectra**

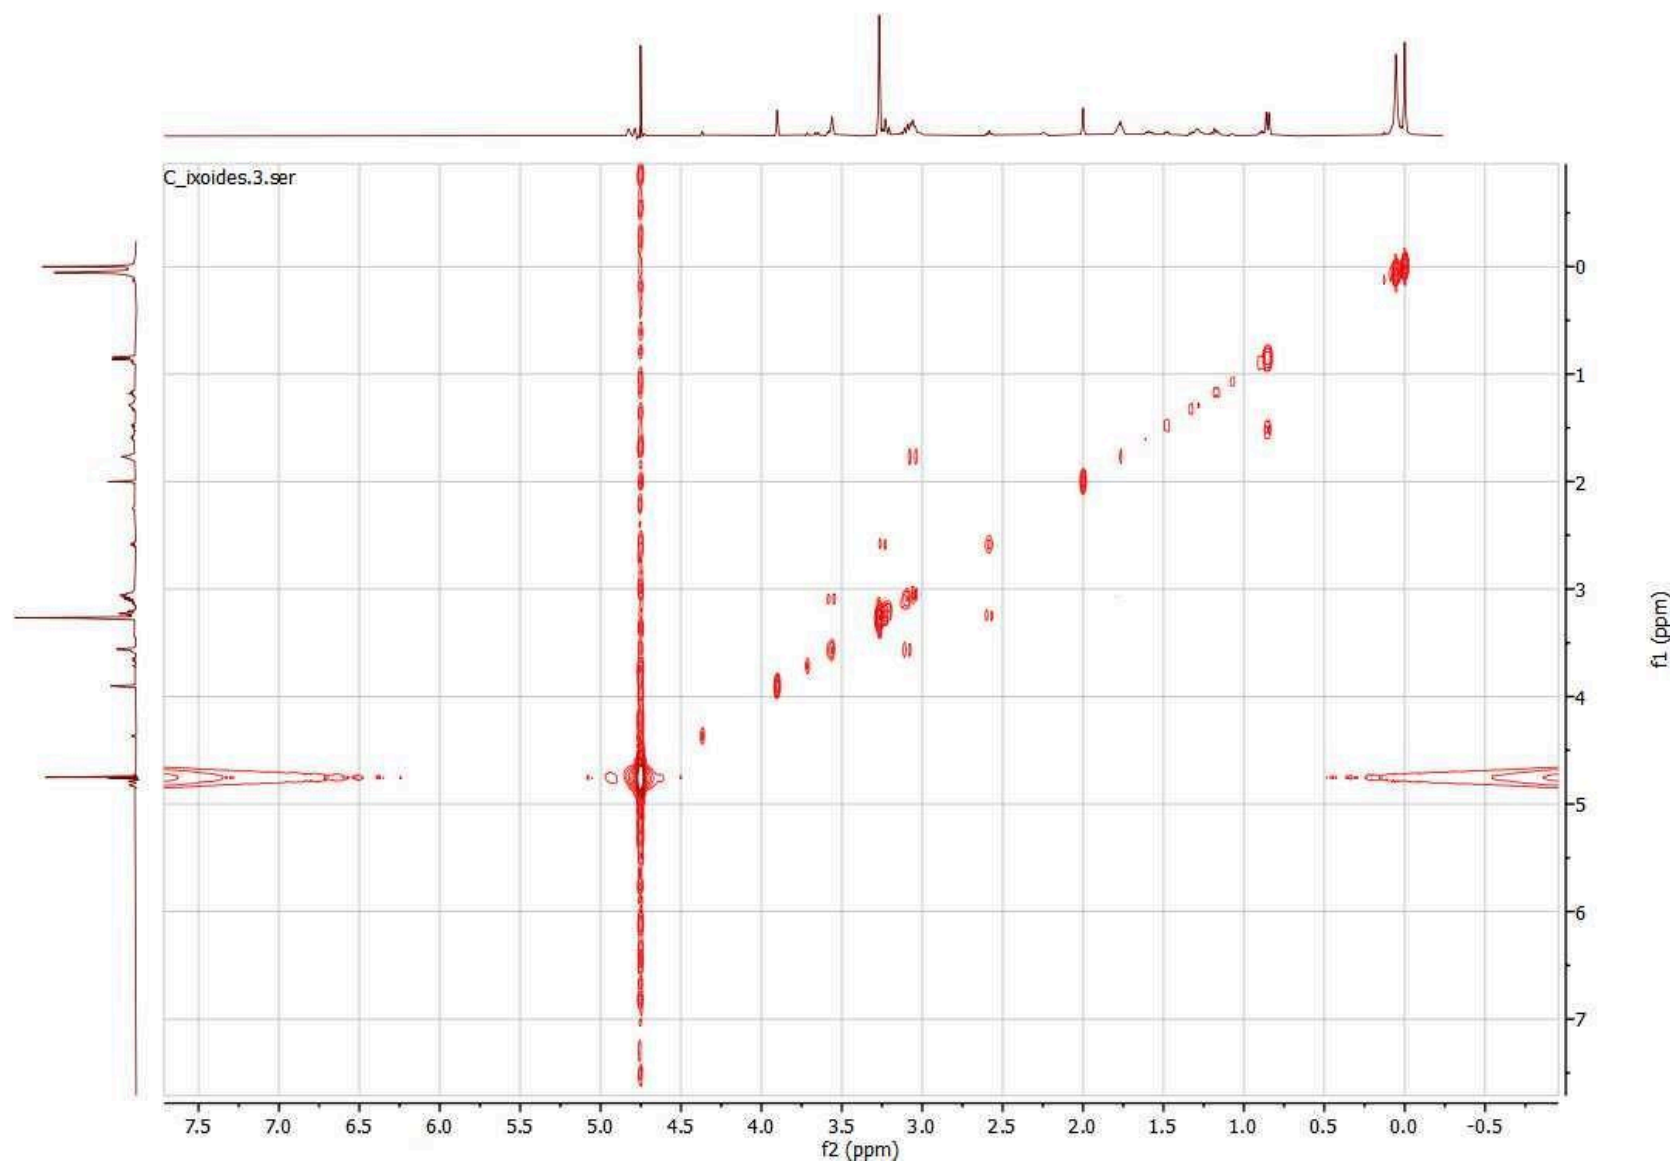

*Cyrtarachne ixoides* – 2D COSY

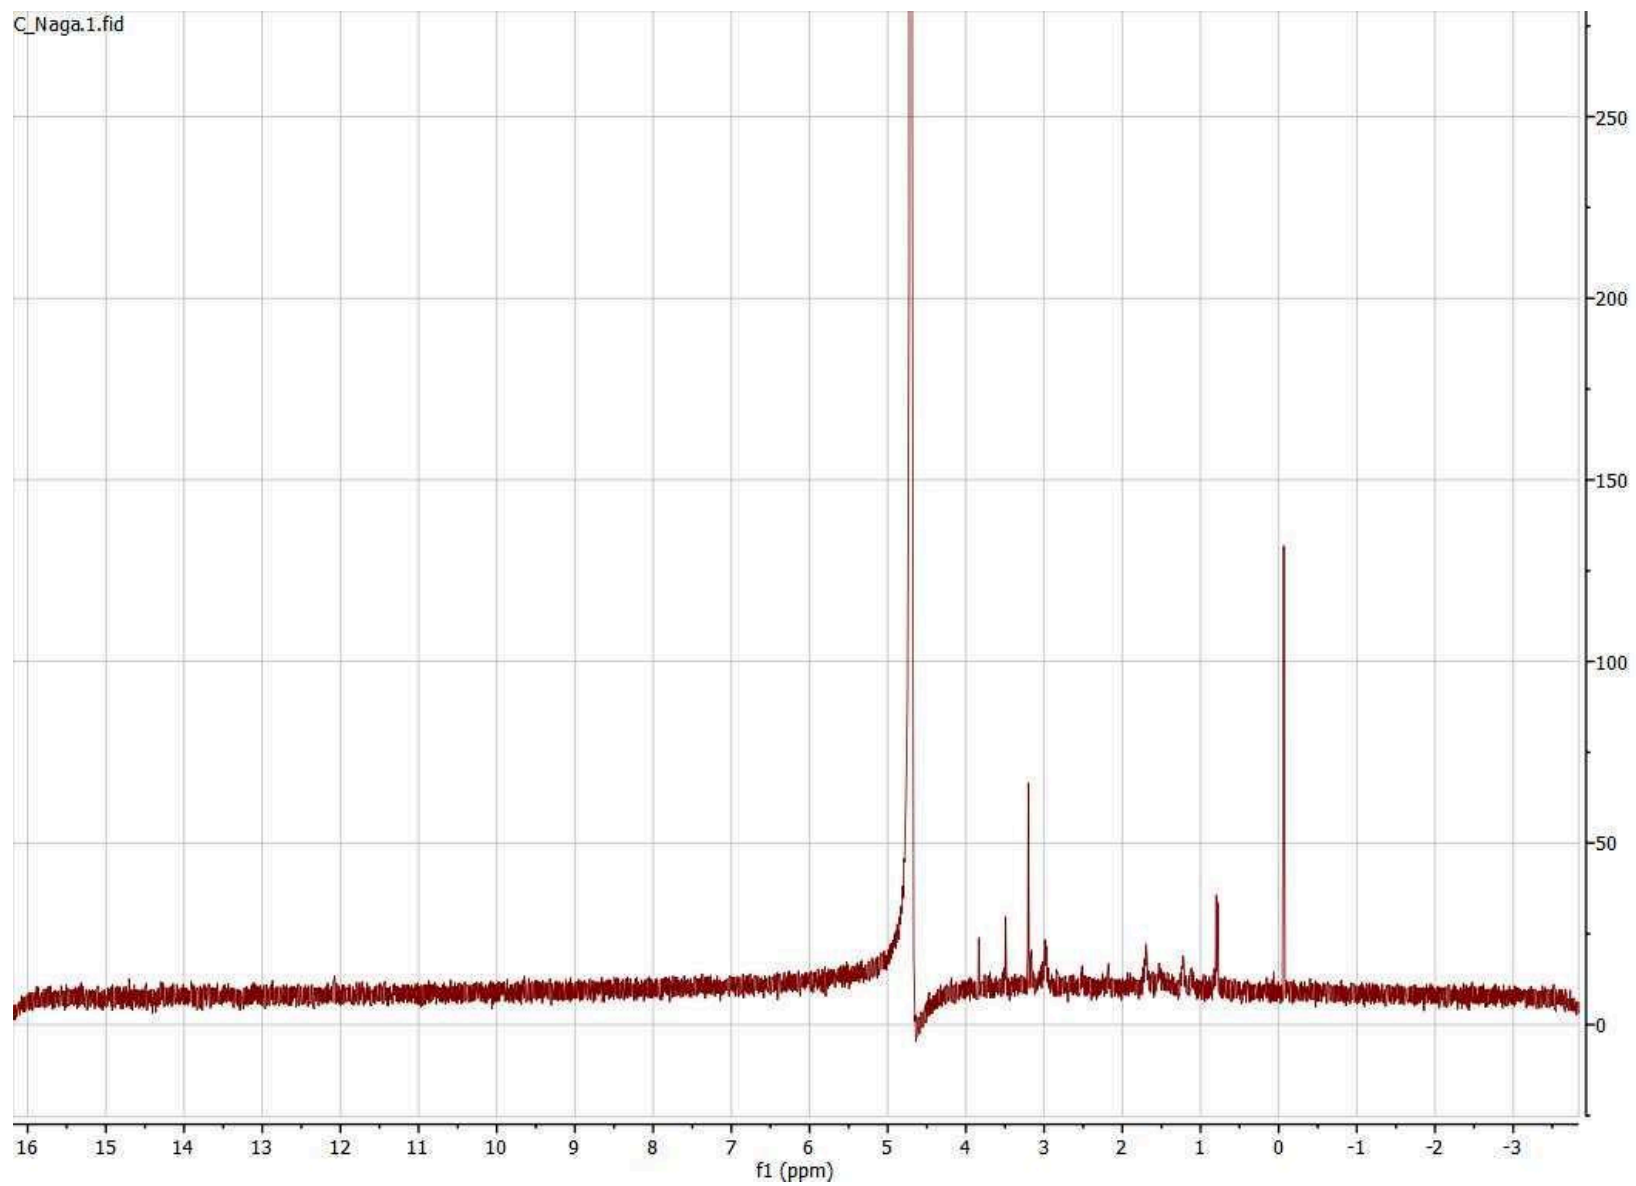

# *Cyrtarachne nagasakiensis* – Survey Spectra

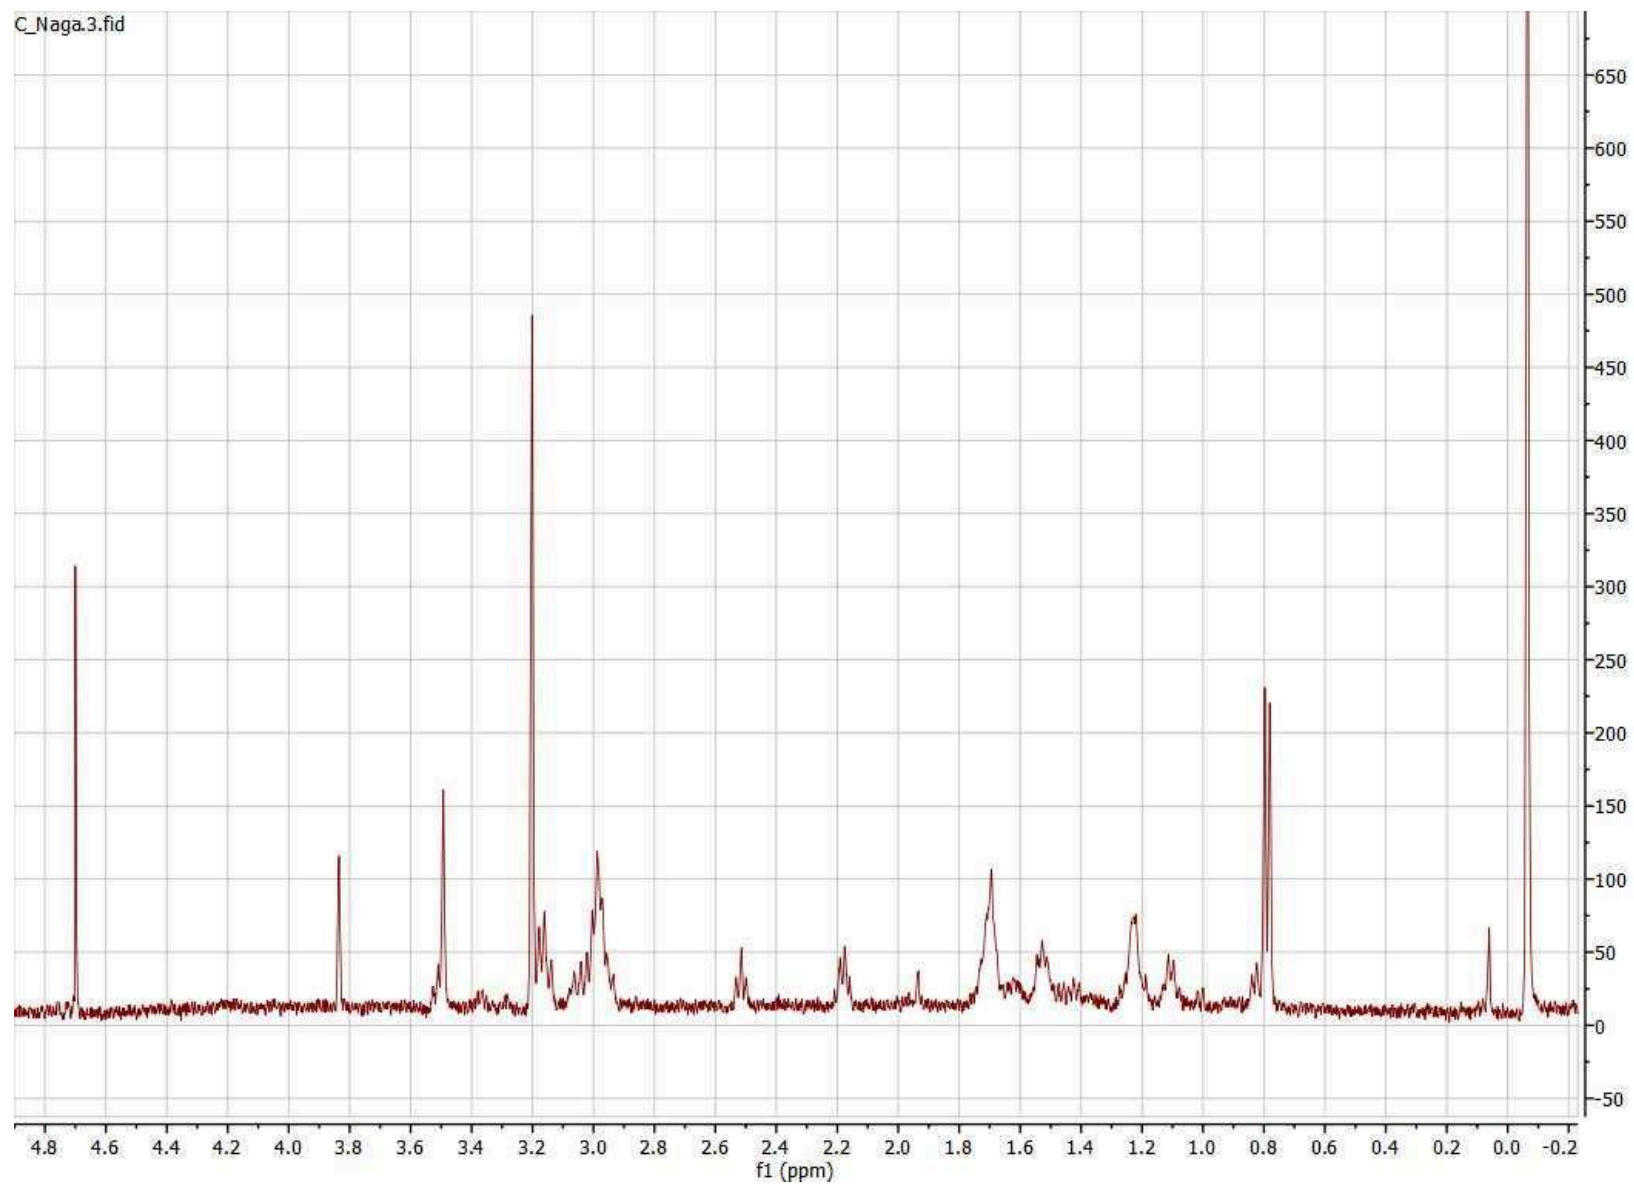

*Cyrtarachne nagasakiensis* – Extended Spectra

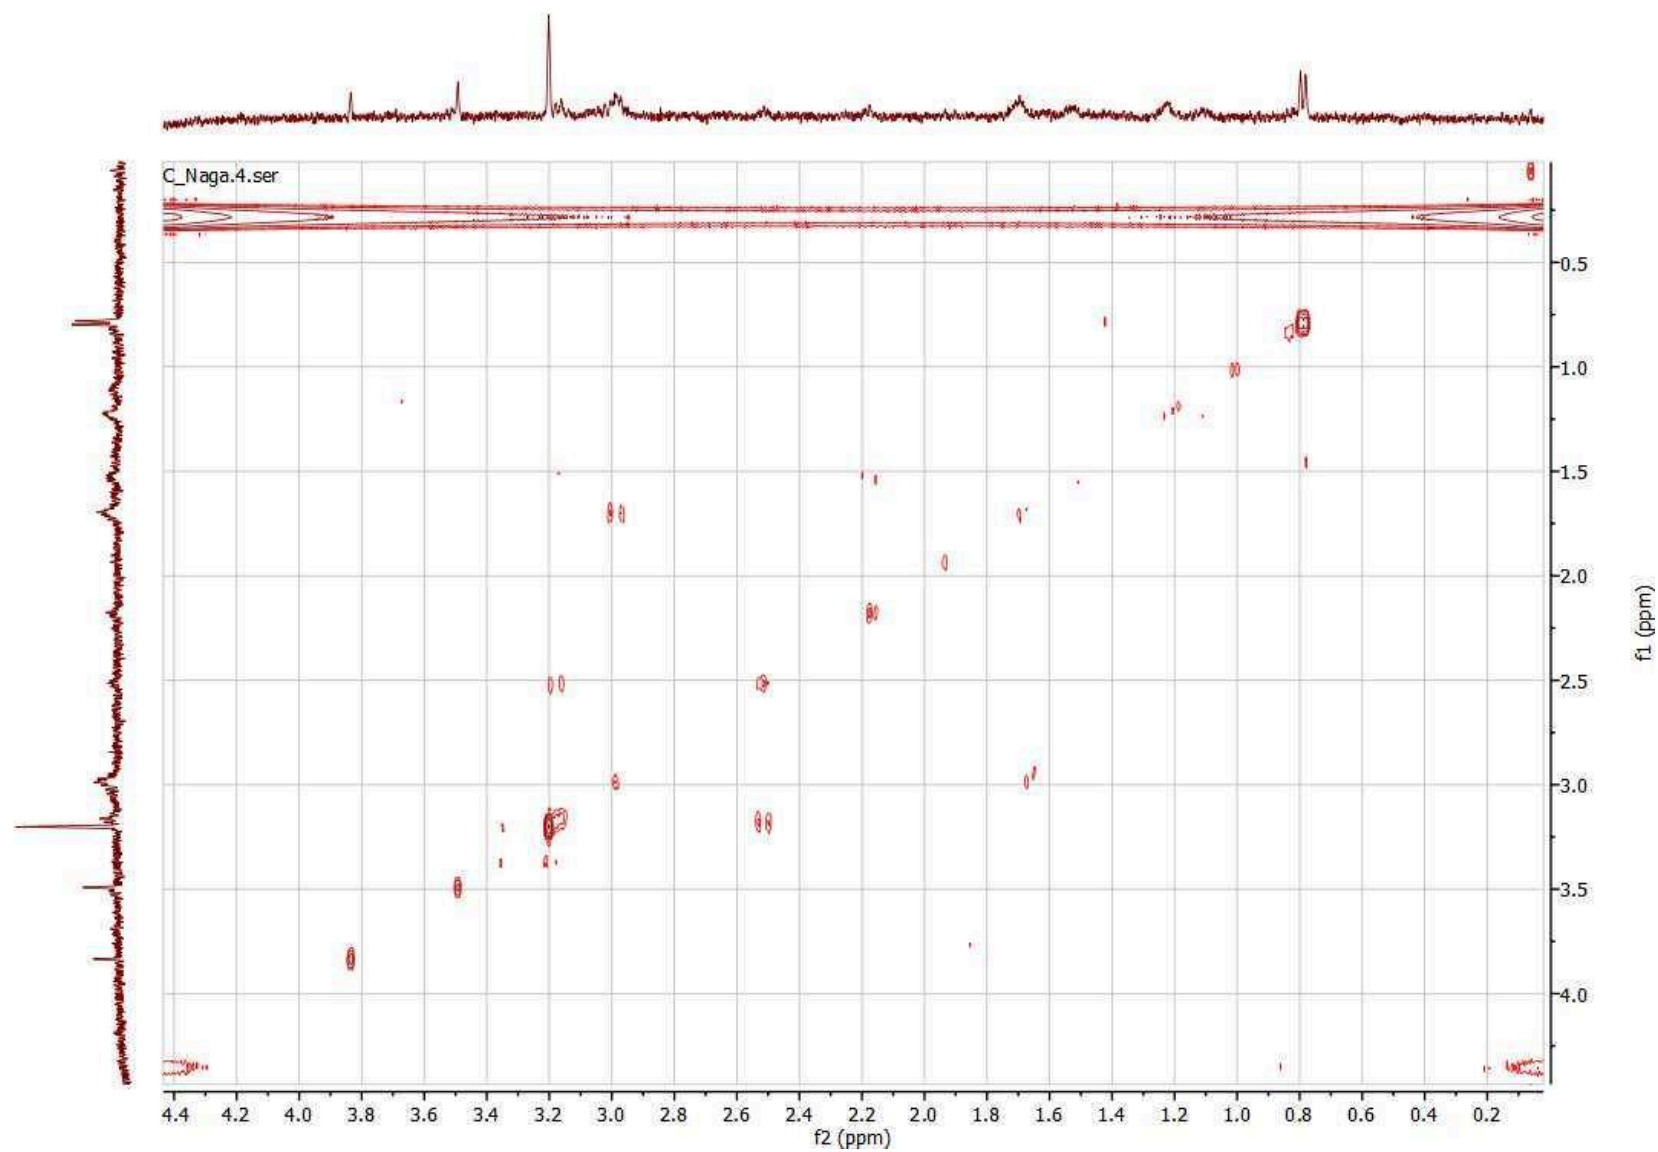

*Cyrtarachne nagasakiensis* – 2D COSY

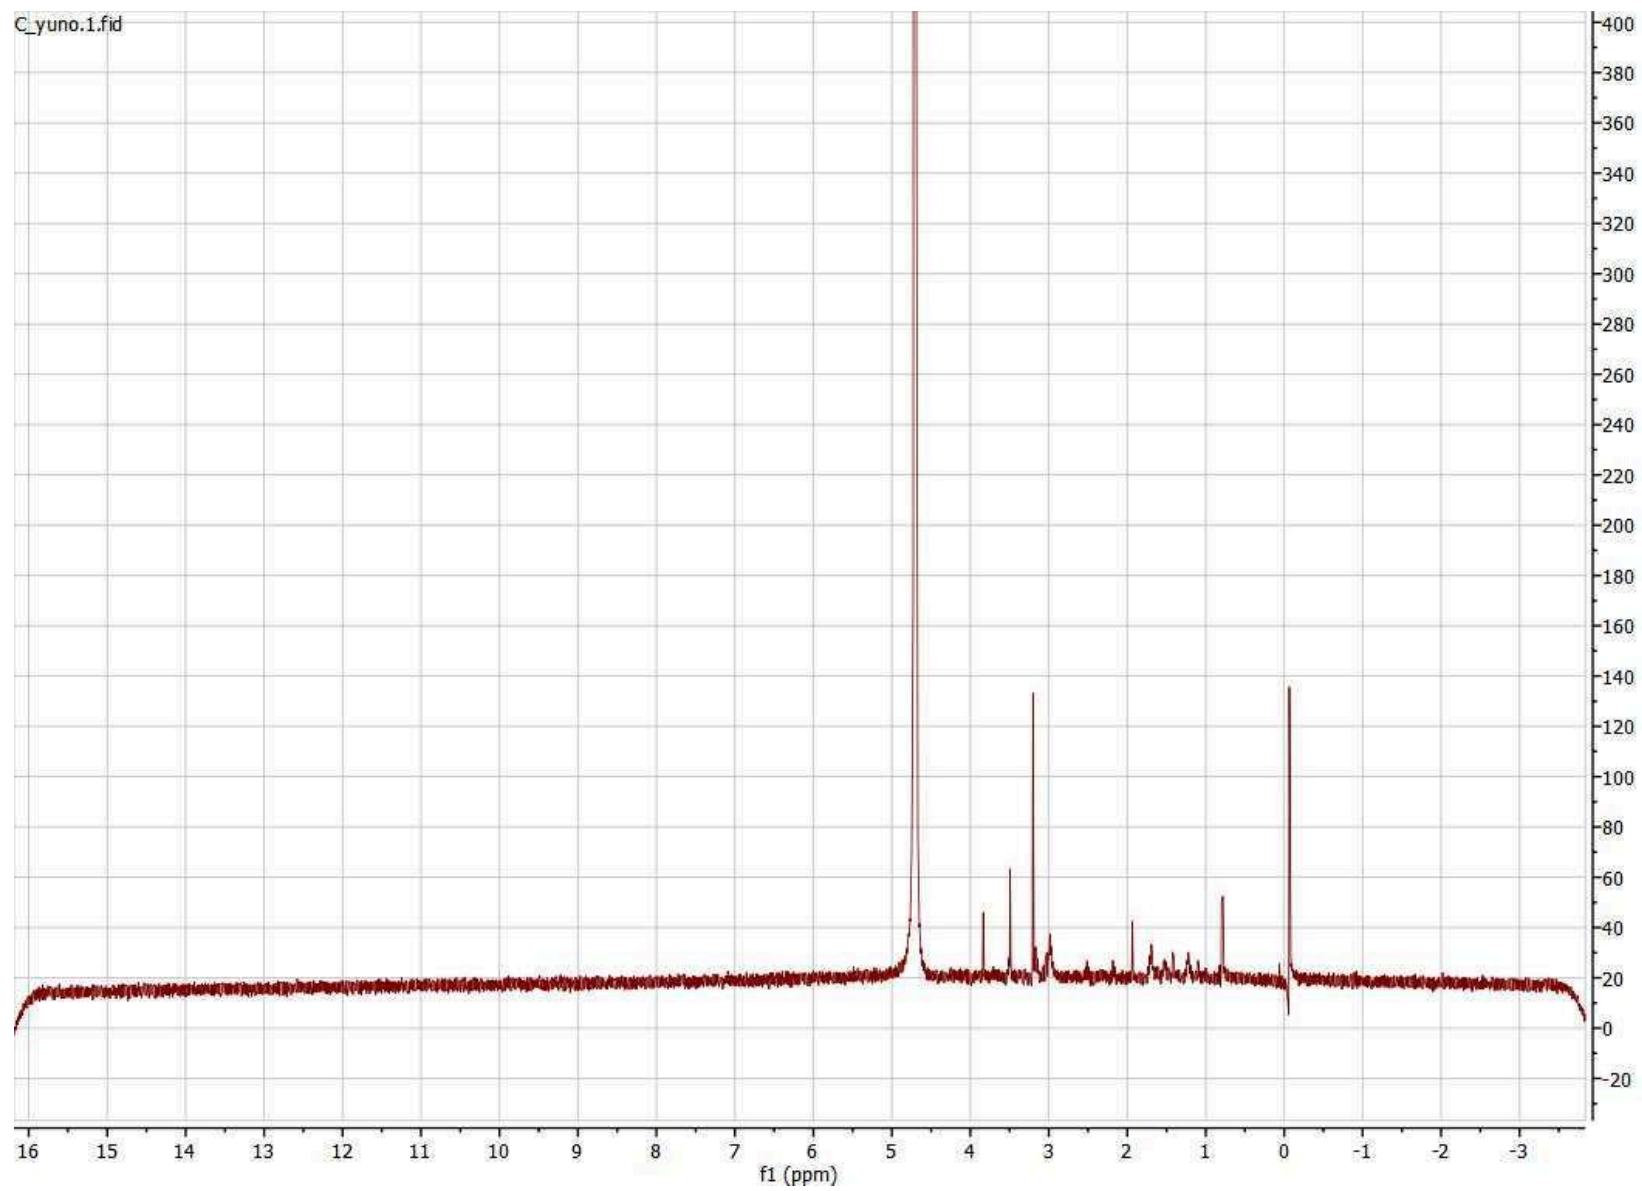

# *Cyrtarachne yunoharuensis* – Survey Spectra

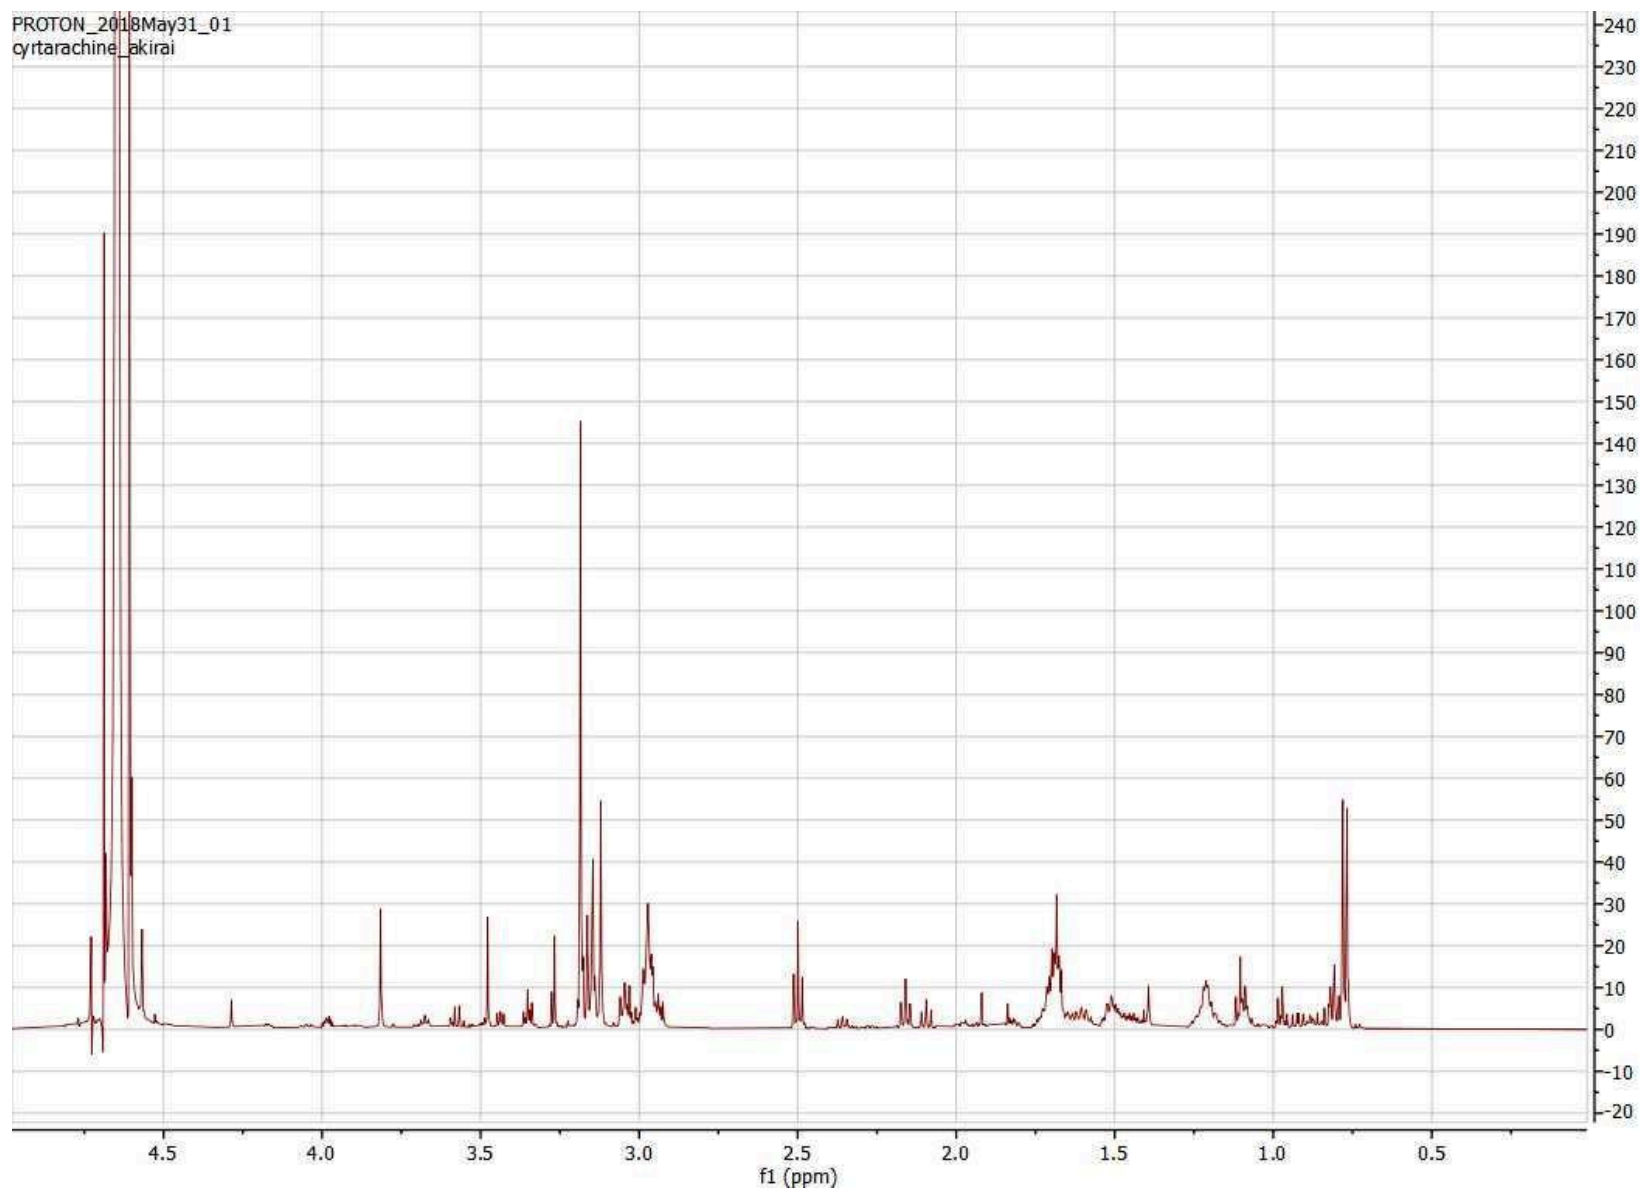



*Cyrtarachne yunoharuensis* – Extended Spectra

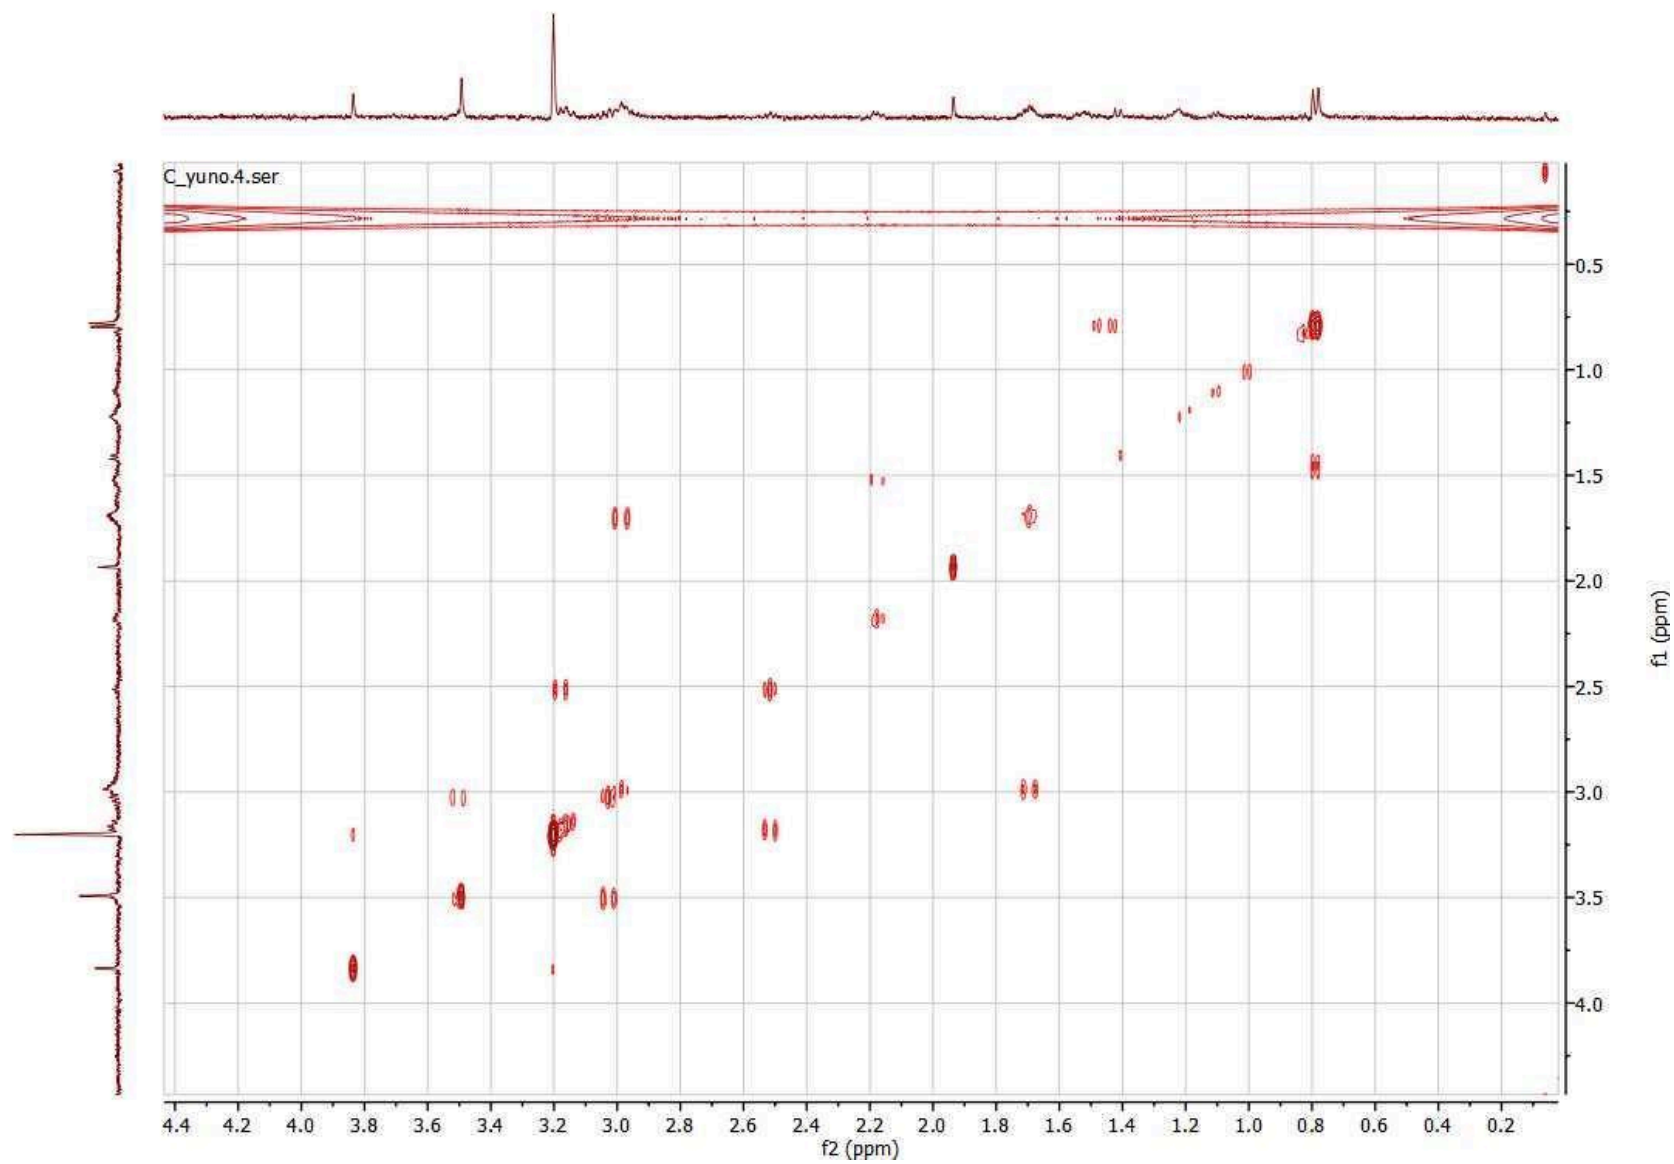

***Cyrtarachne yunoharuensis* – 2D COSY**

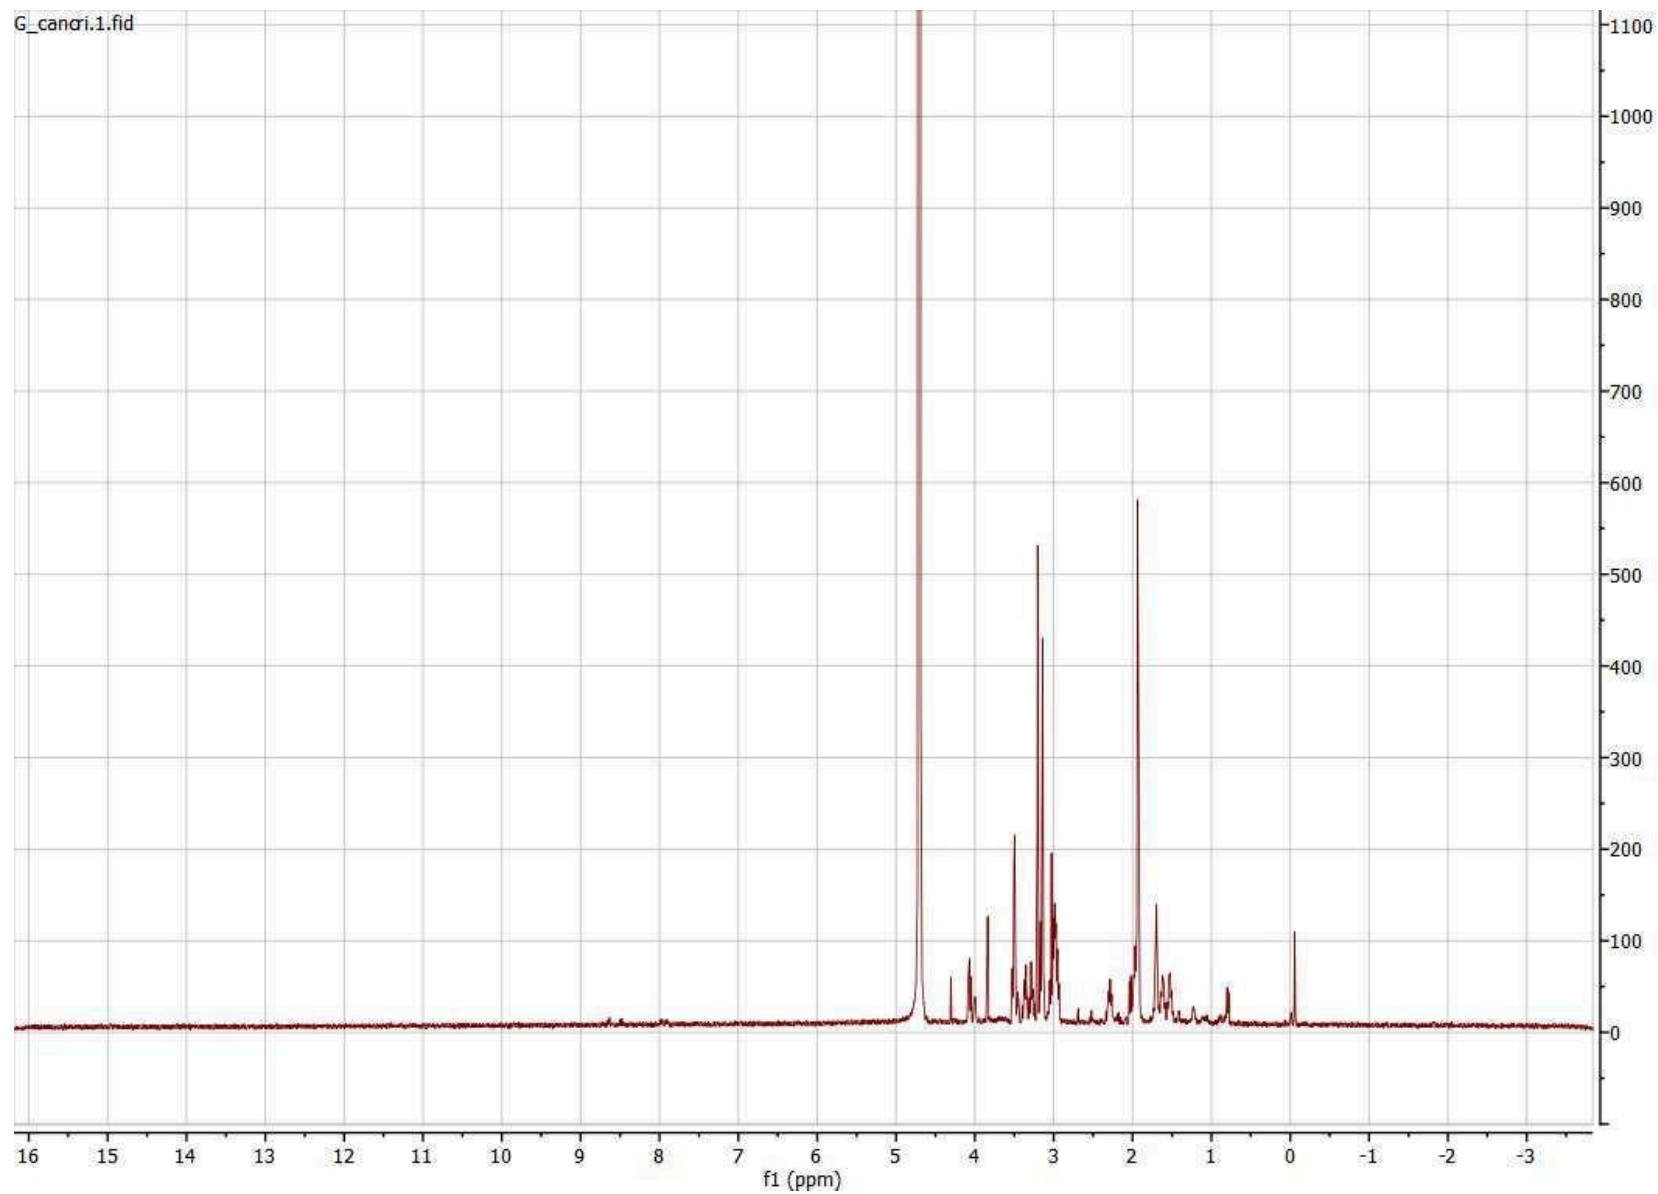

***Gasteracantha cancriformis*- Survey Spectra**

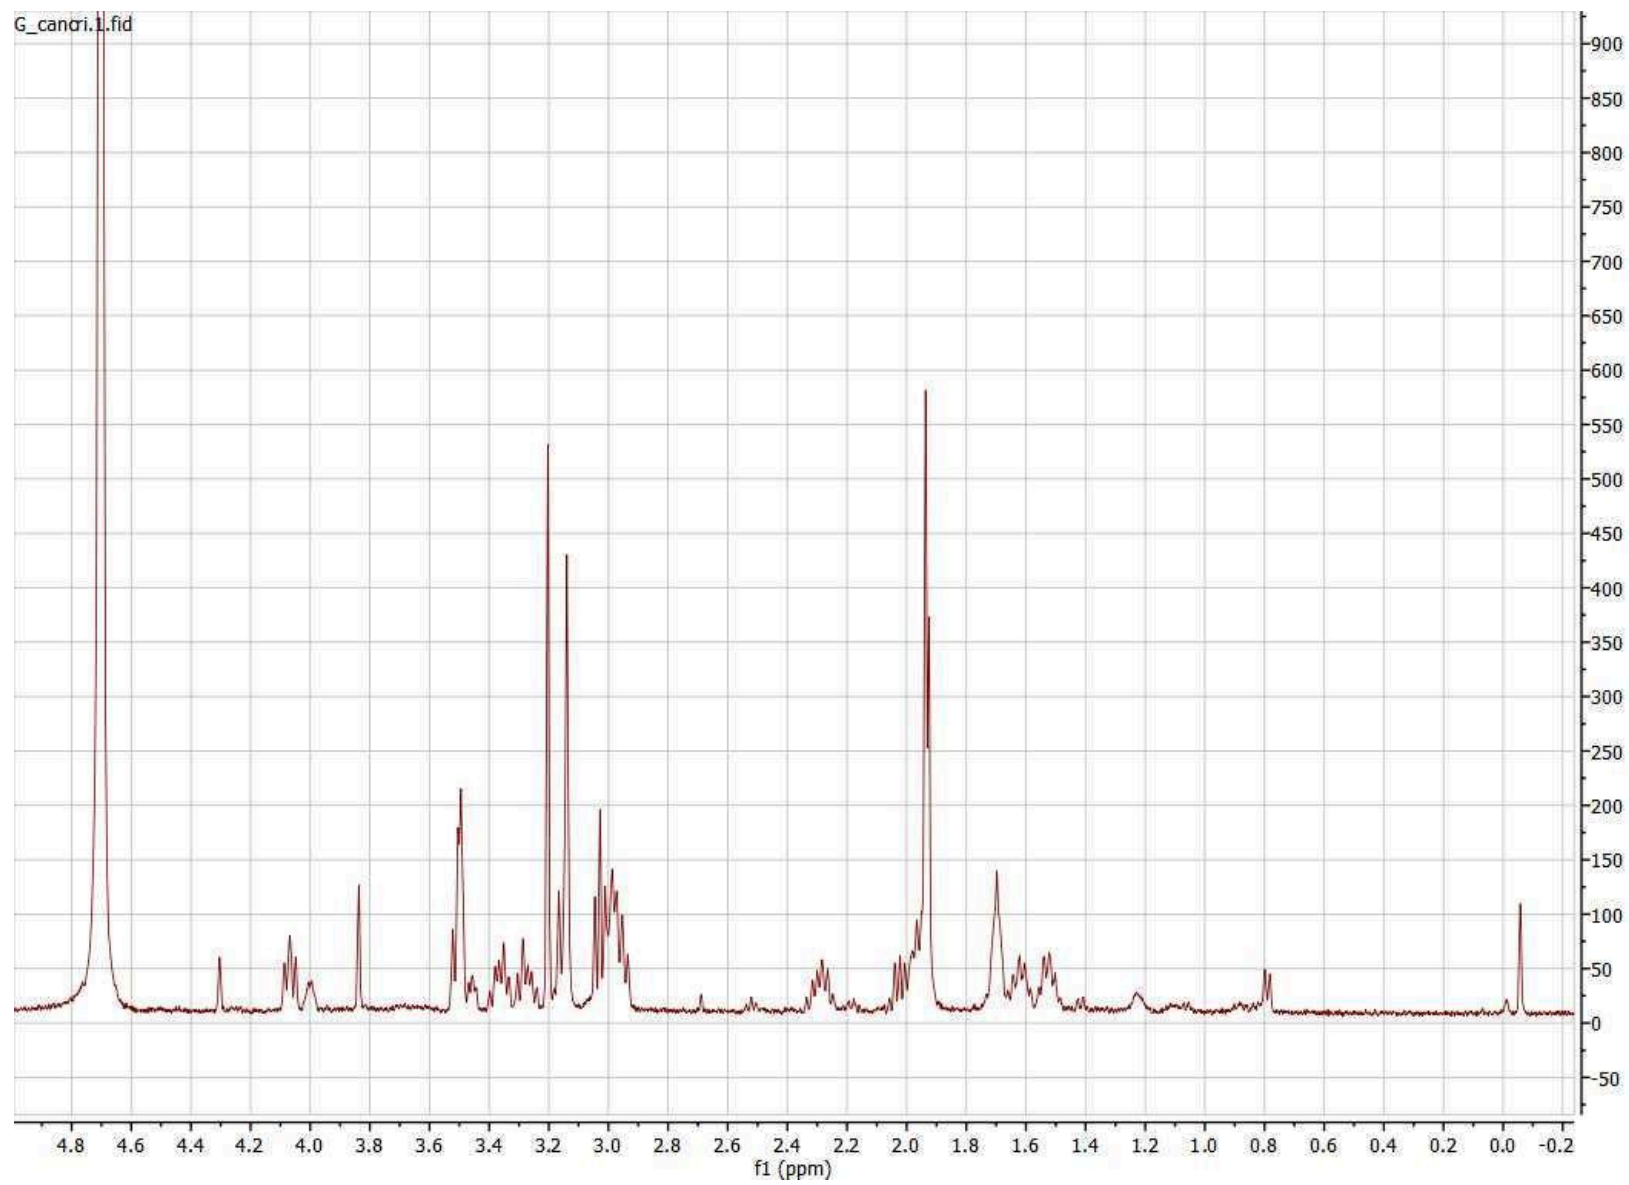

***Gasteracantha cancriformis*- Extended Spectra**

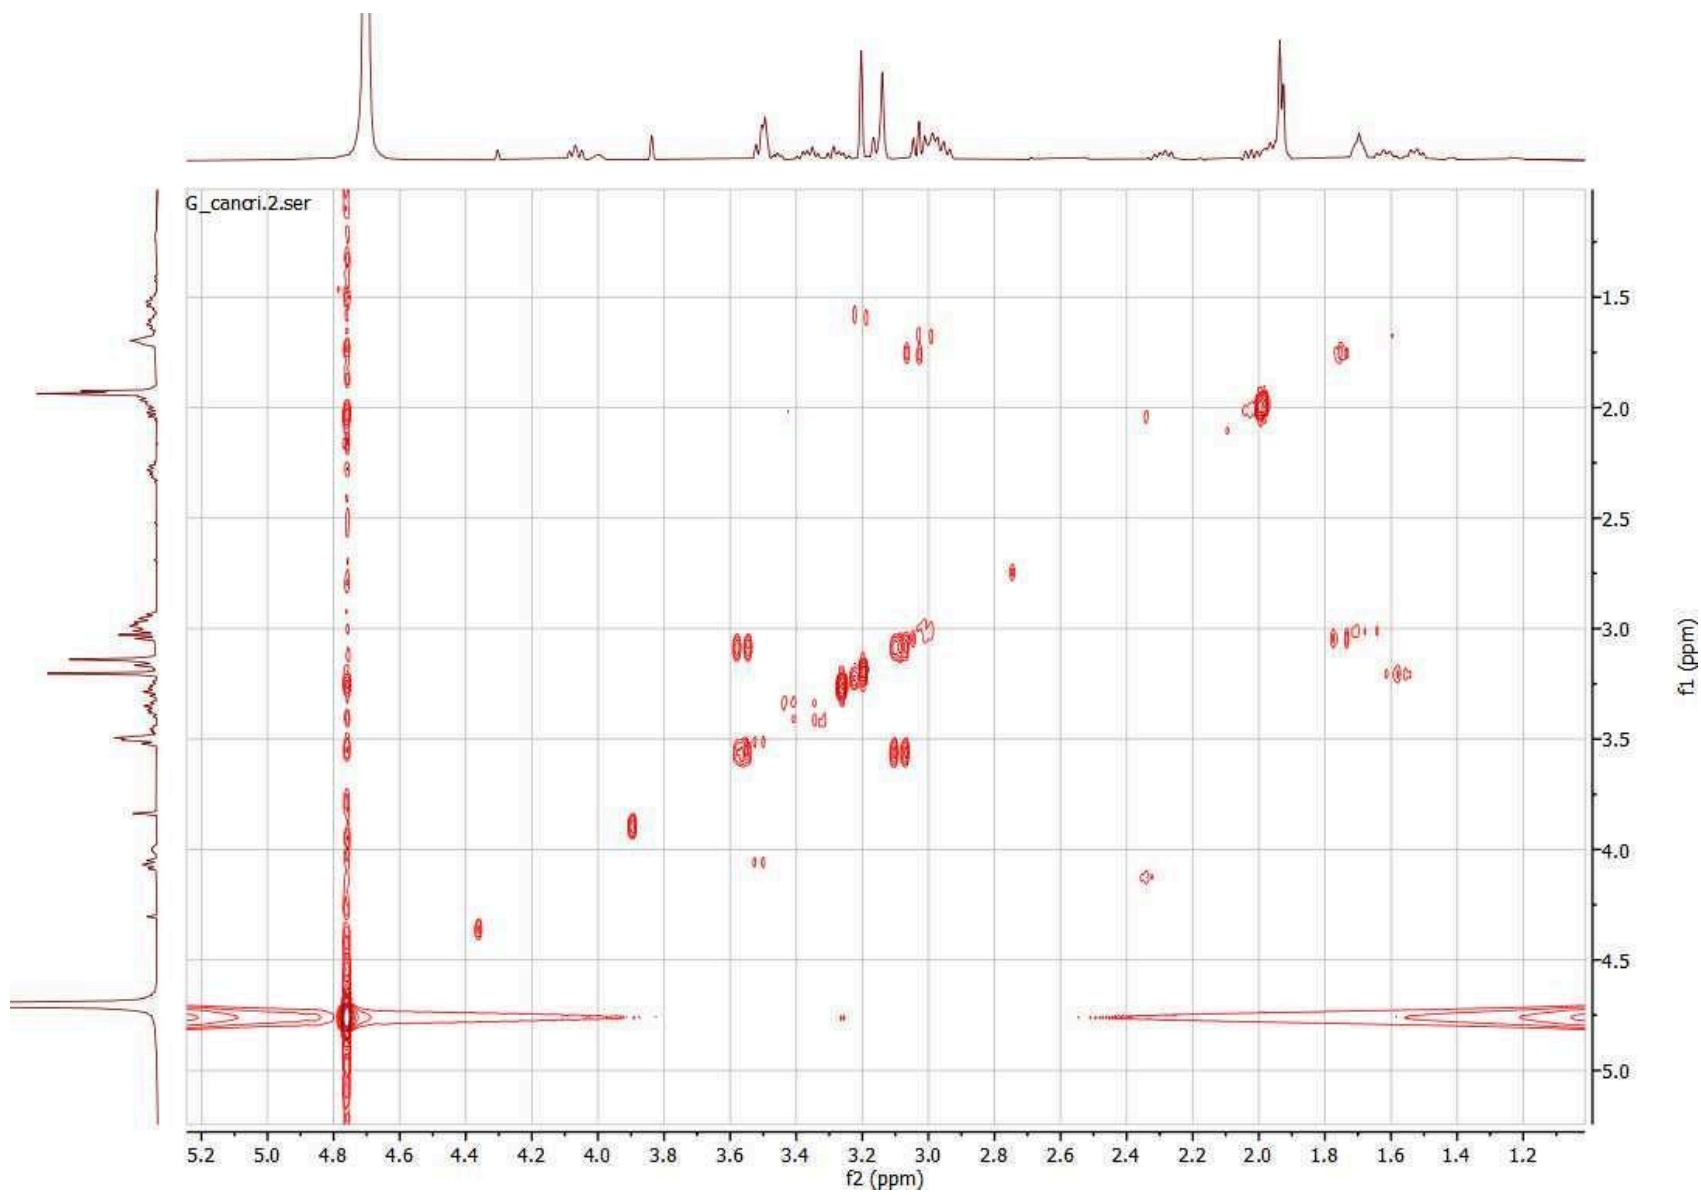

***Gasteracantha cancriformis*- 2D COSY**

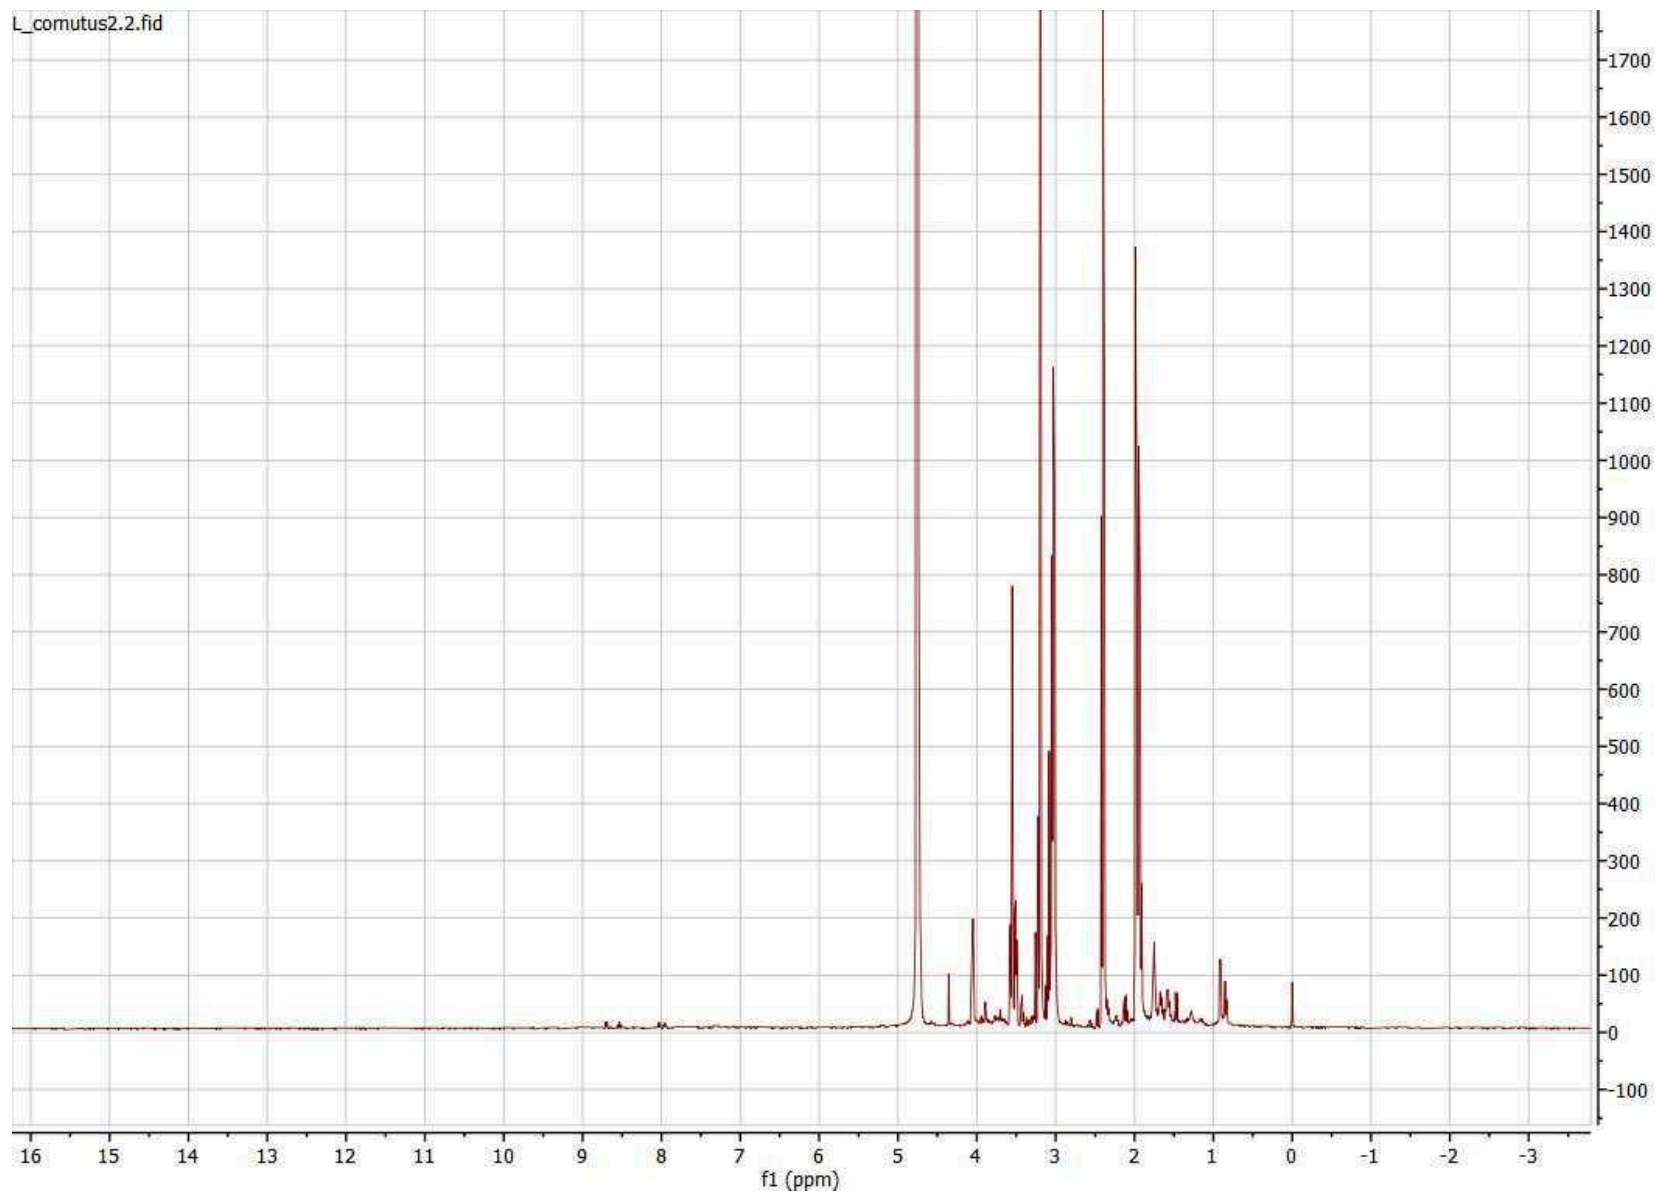

***Larinioides cornutus* – Survey Spectra**



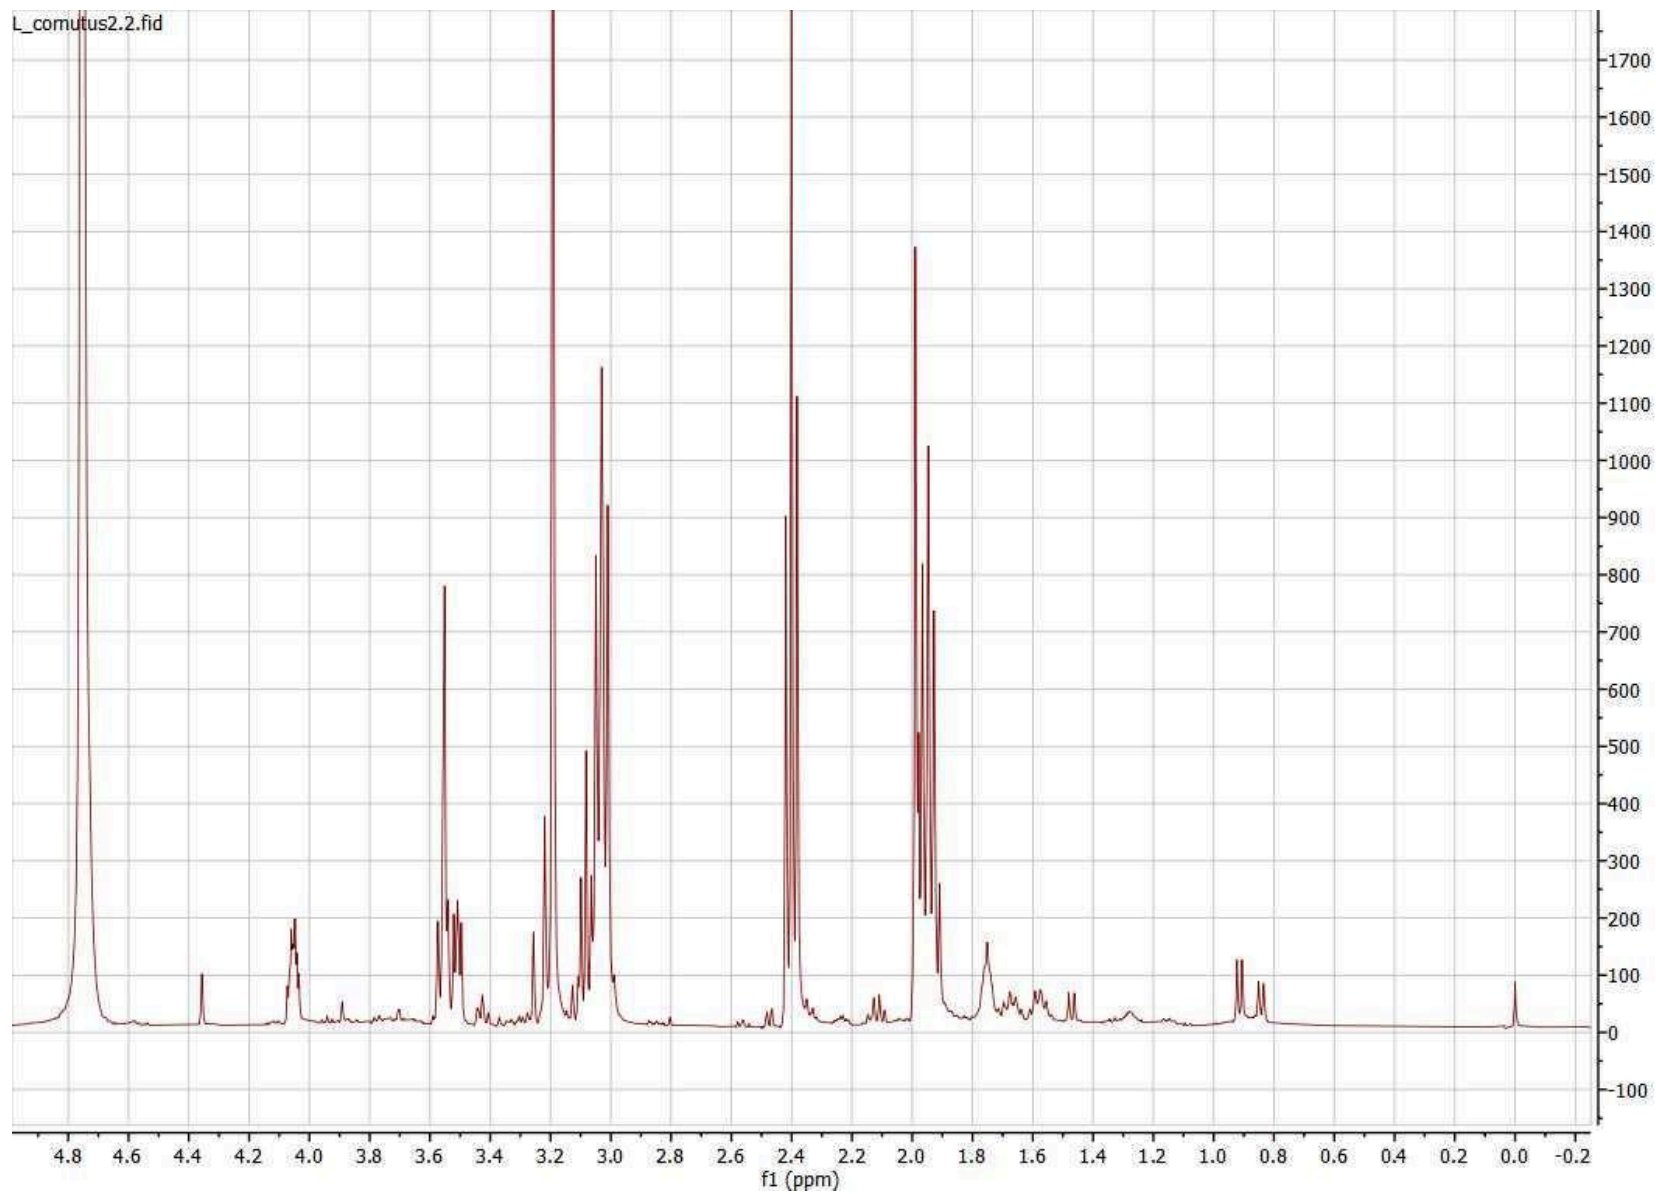

***Larinioides cornutus* – Extended Spectra**

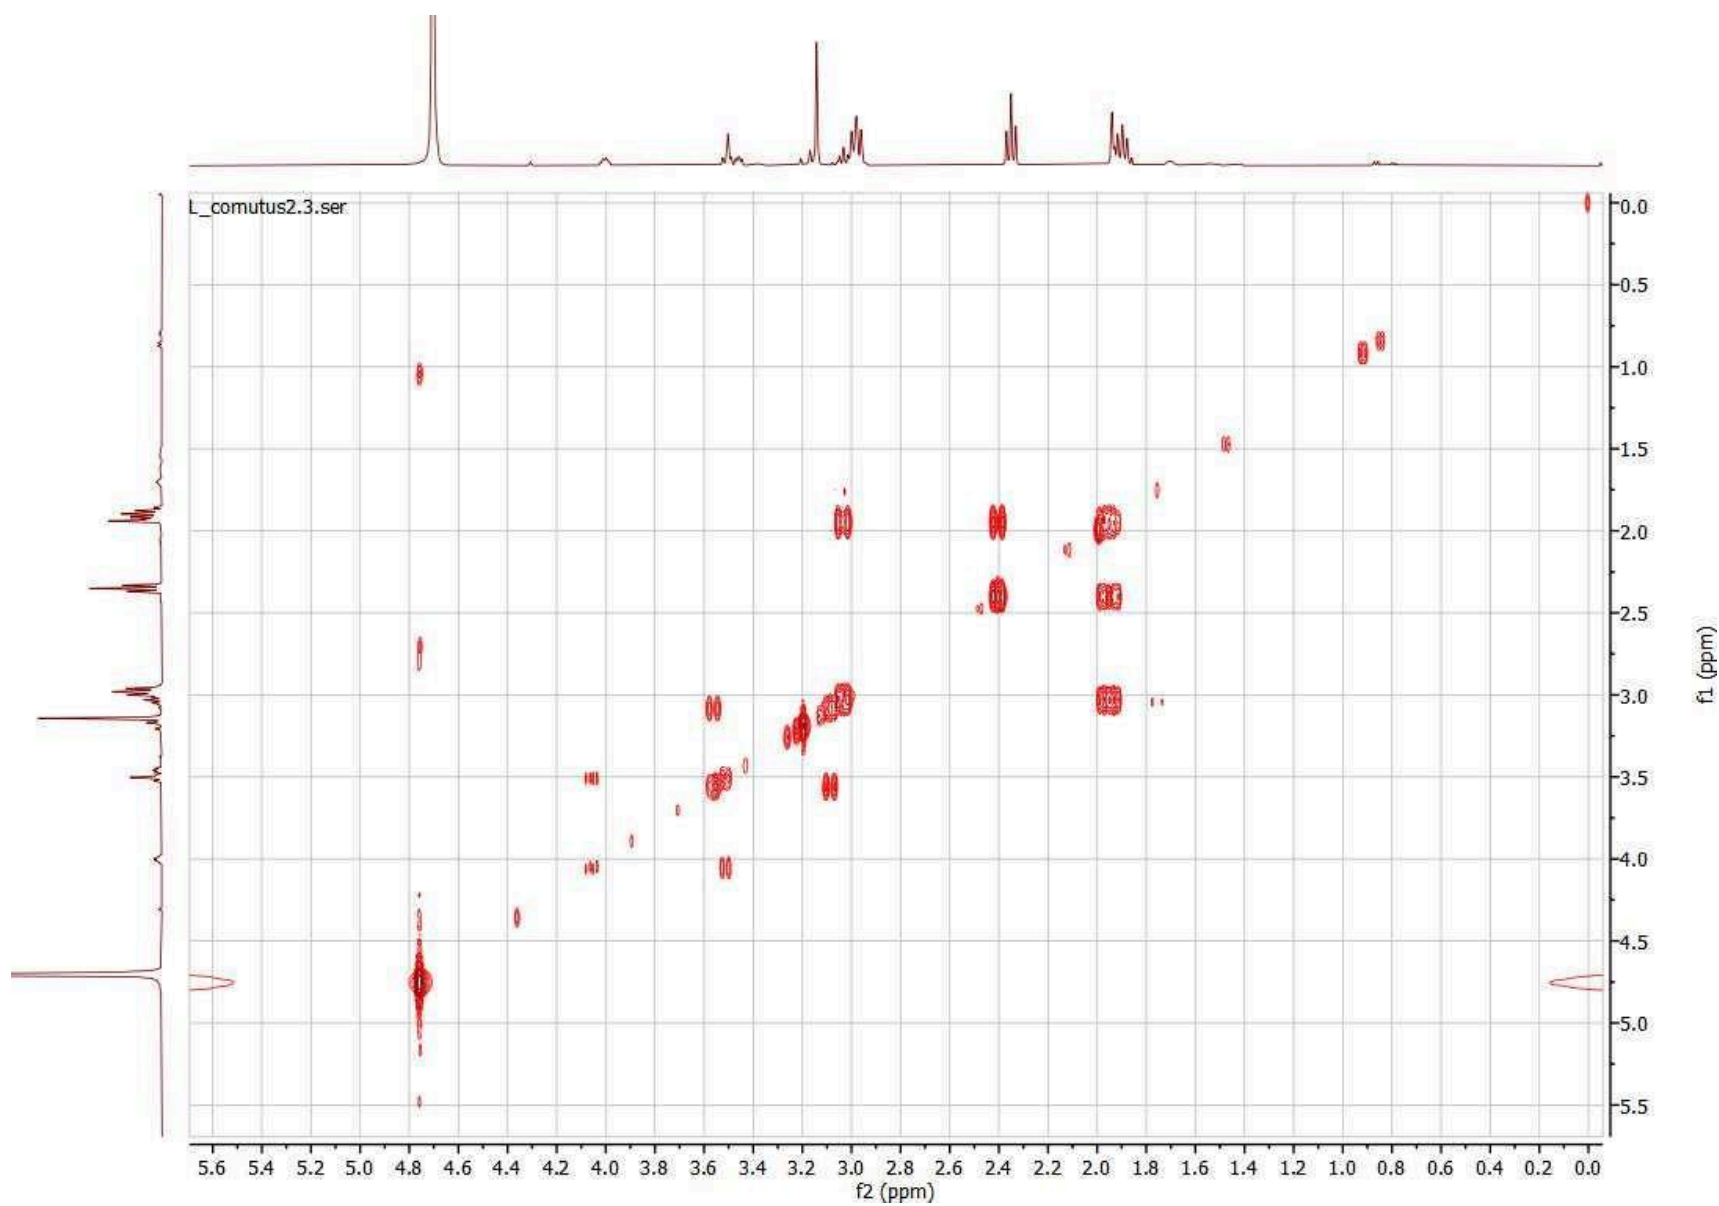

*Larinioides cornutus* – 2D COSY

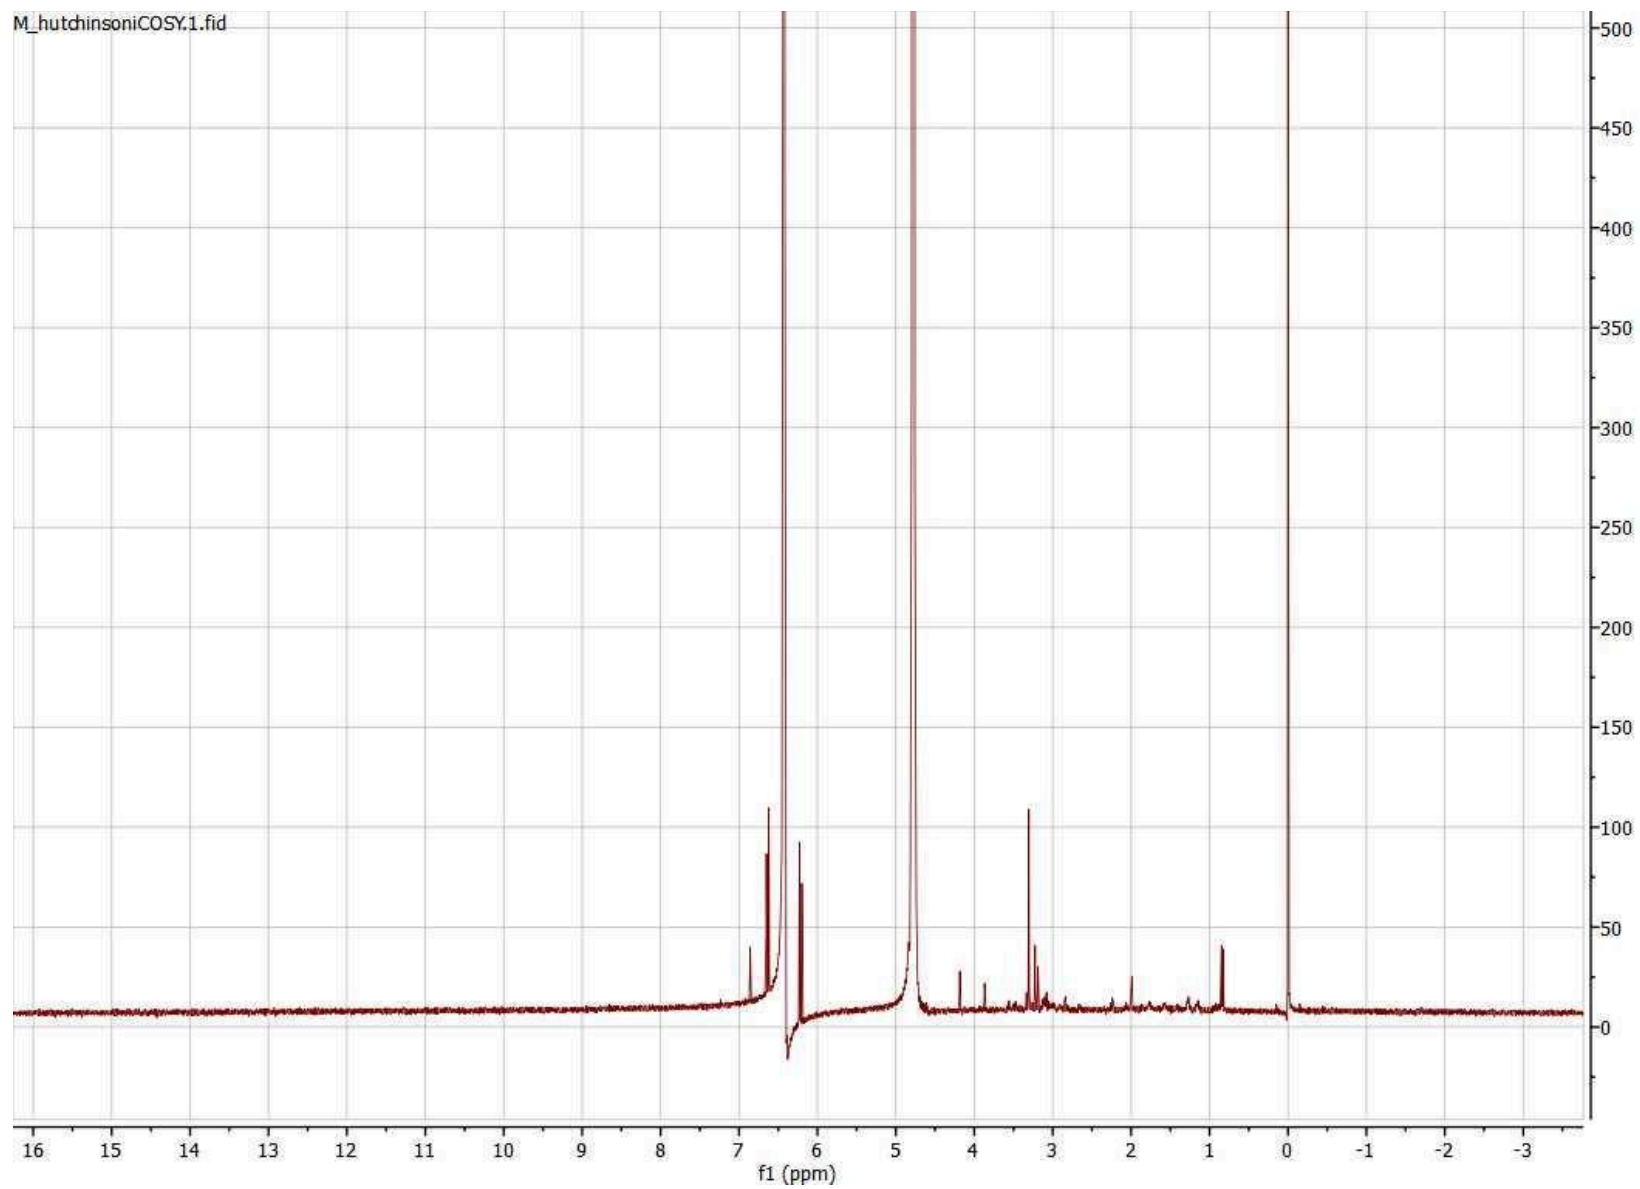

***Mastophora hutchinsoni* – Survey Spectra (contains added maleic acid ~ 6.5 ppm)**

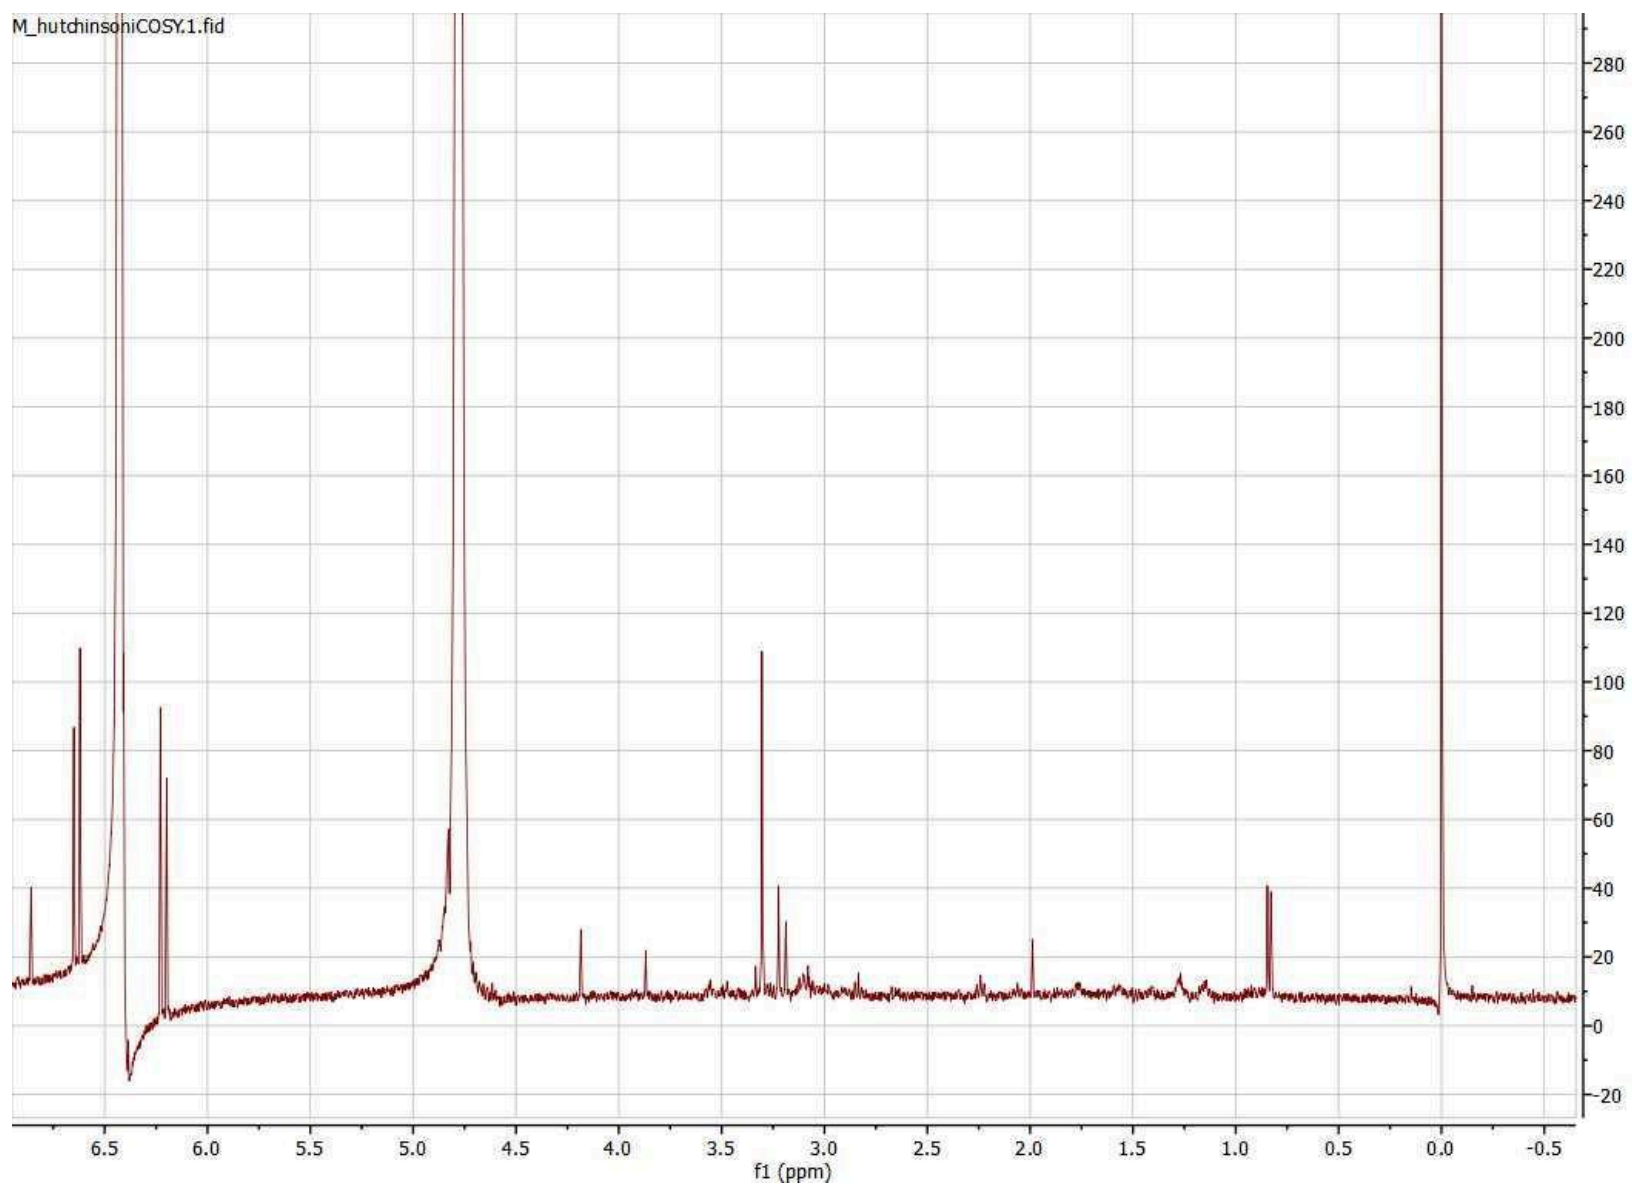

***Mastophora hutchinsoni* – Extended Spectra (contains added maleic acid ~ 6.5 ppm)**

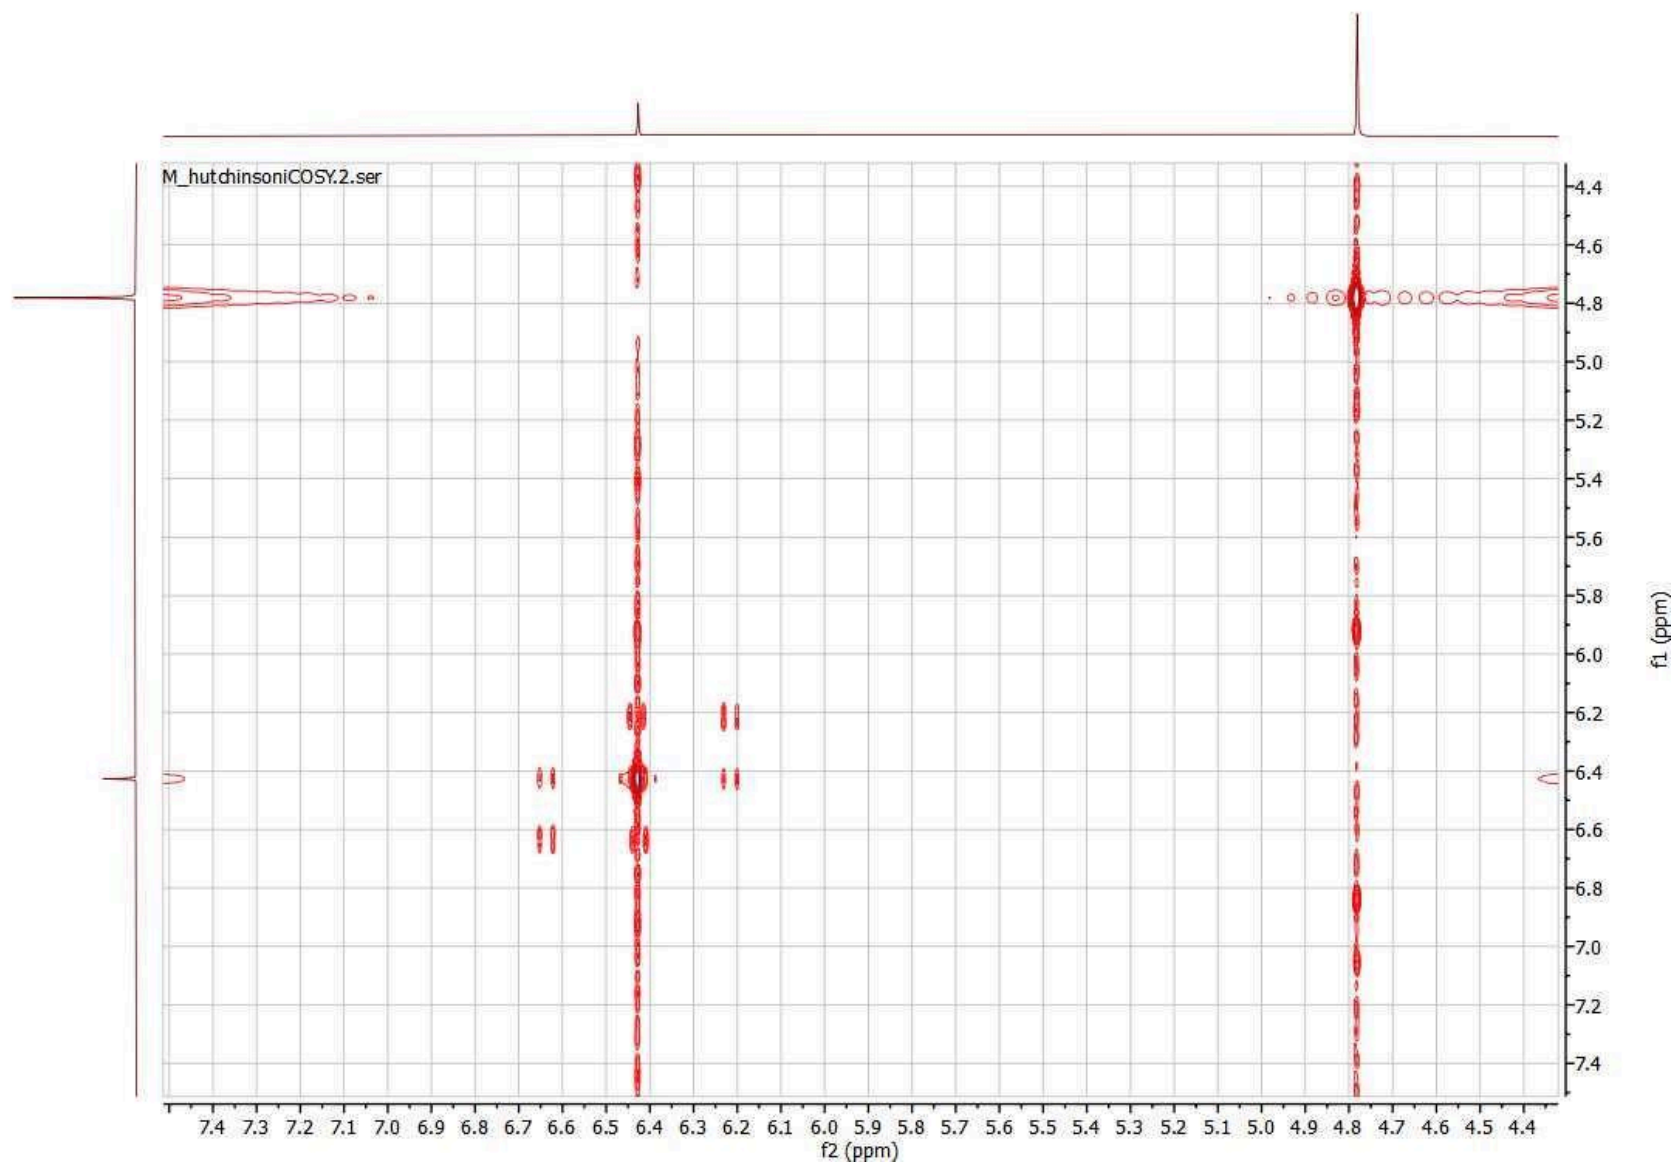

*Mastophora hutchinsoni* – 2D COSY

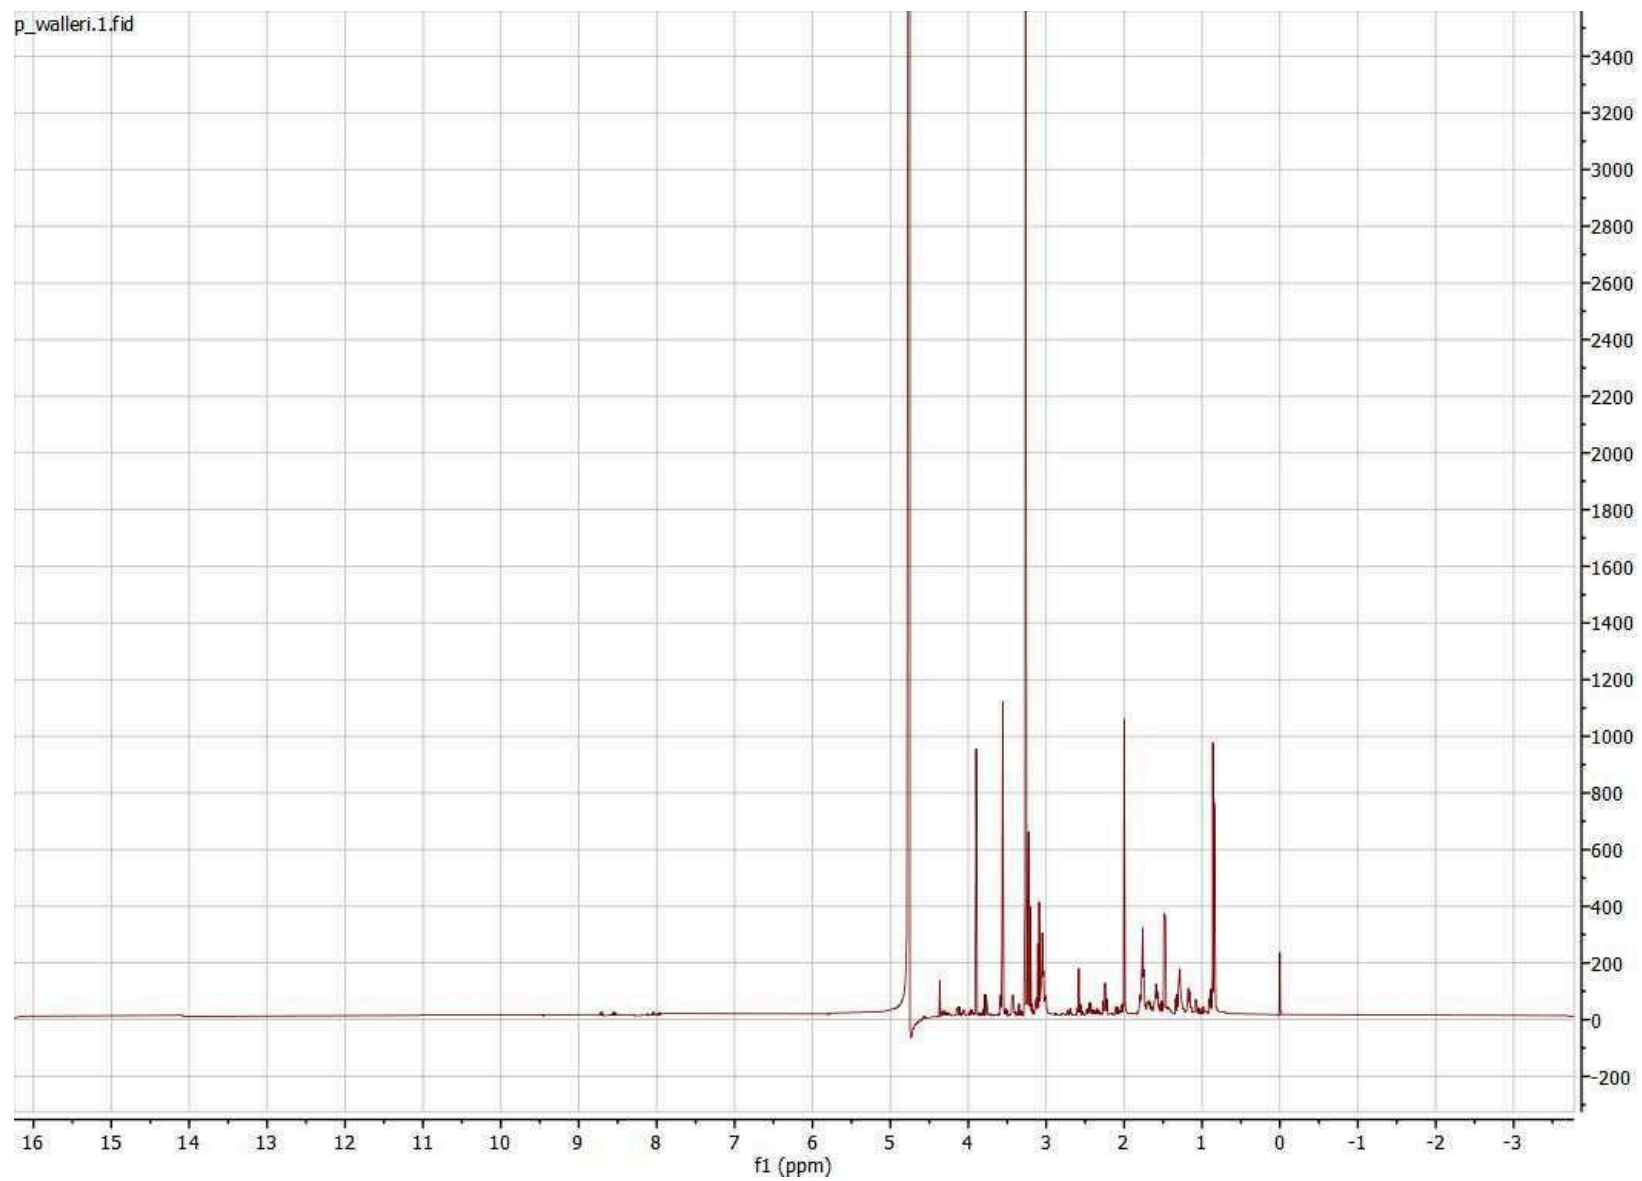

***Paraplectana walleri* – Survey Spectra**

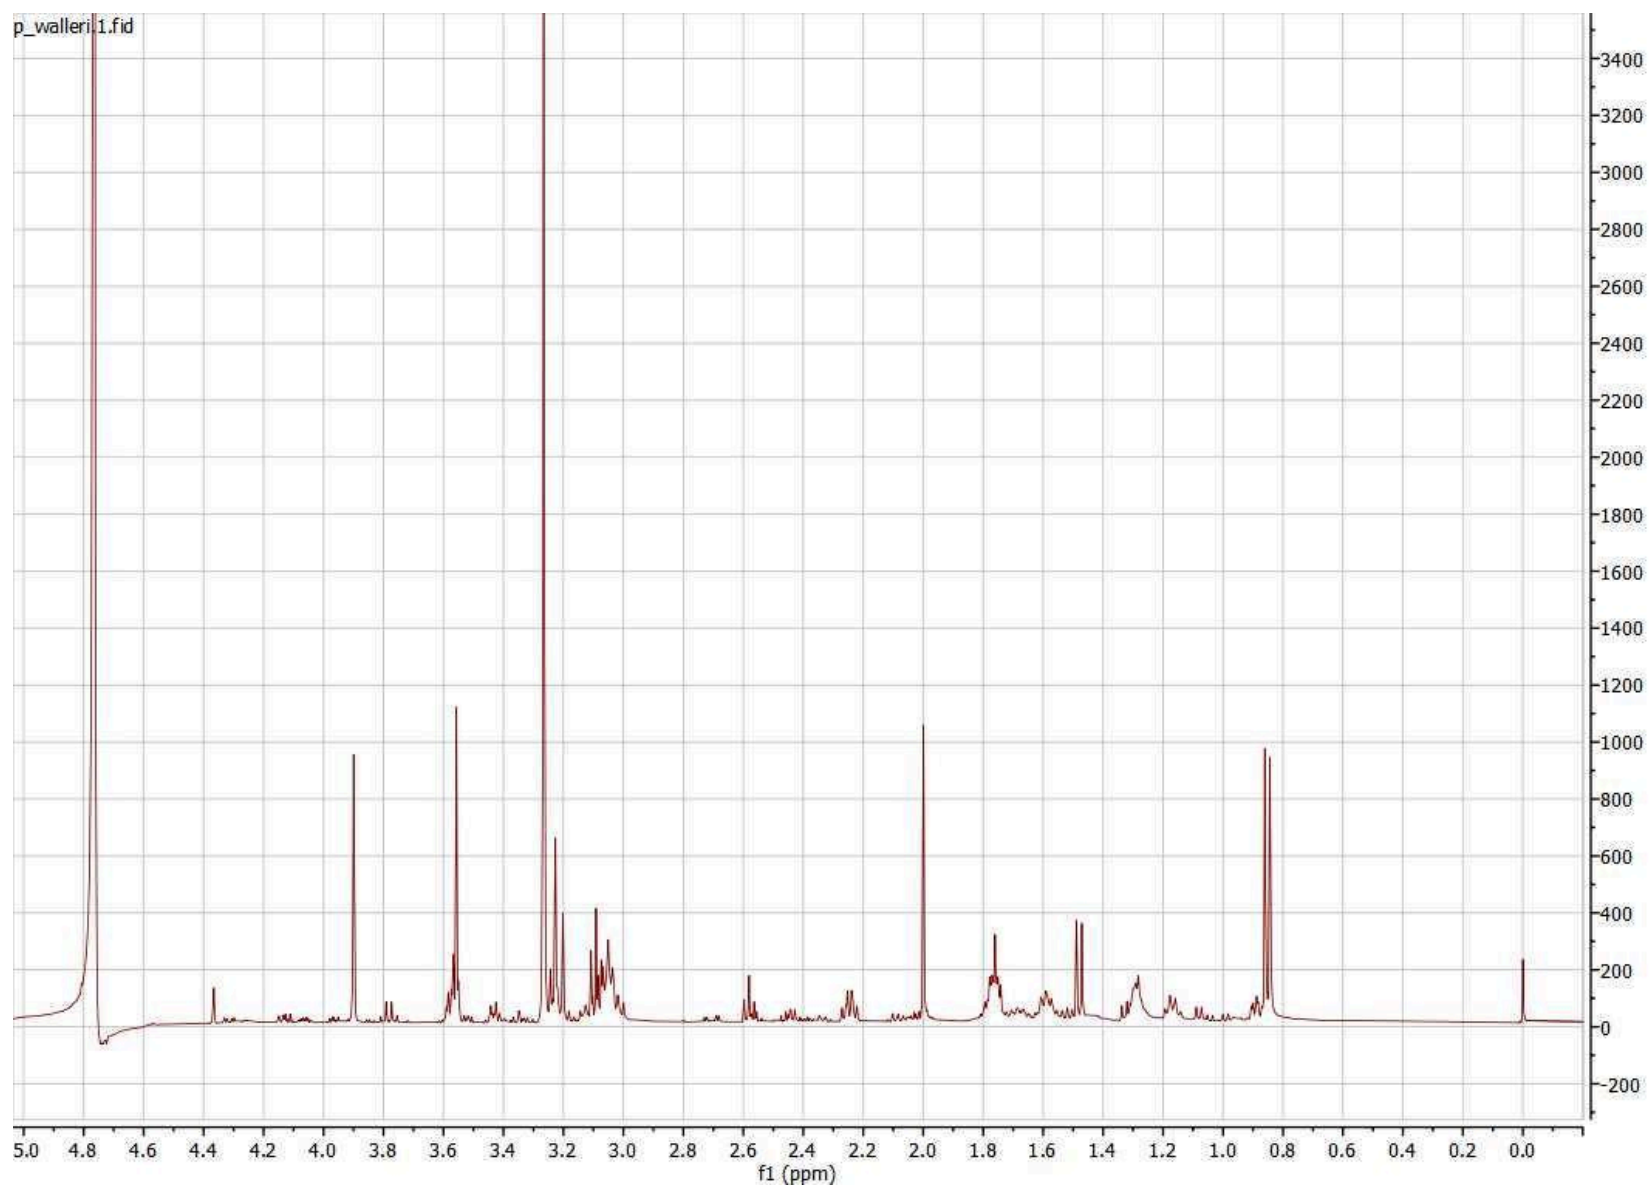

***Paraplectana walleri* – Extended Spectra**



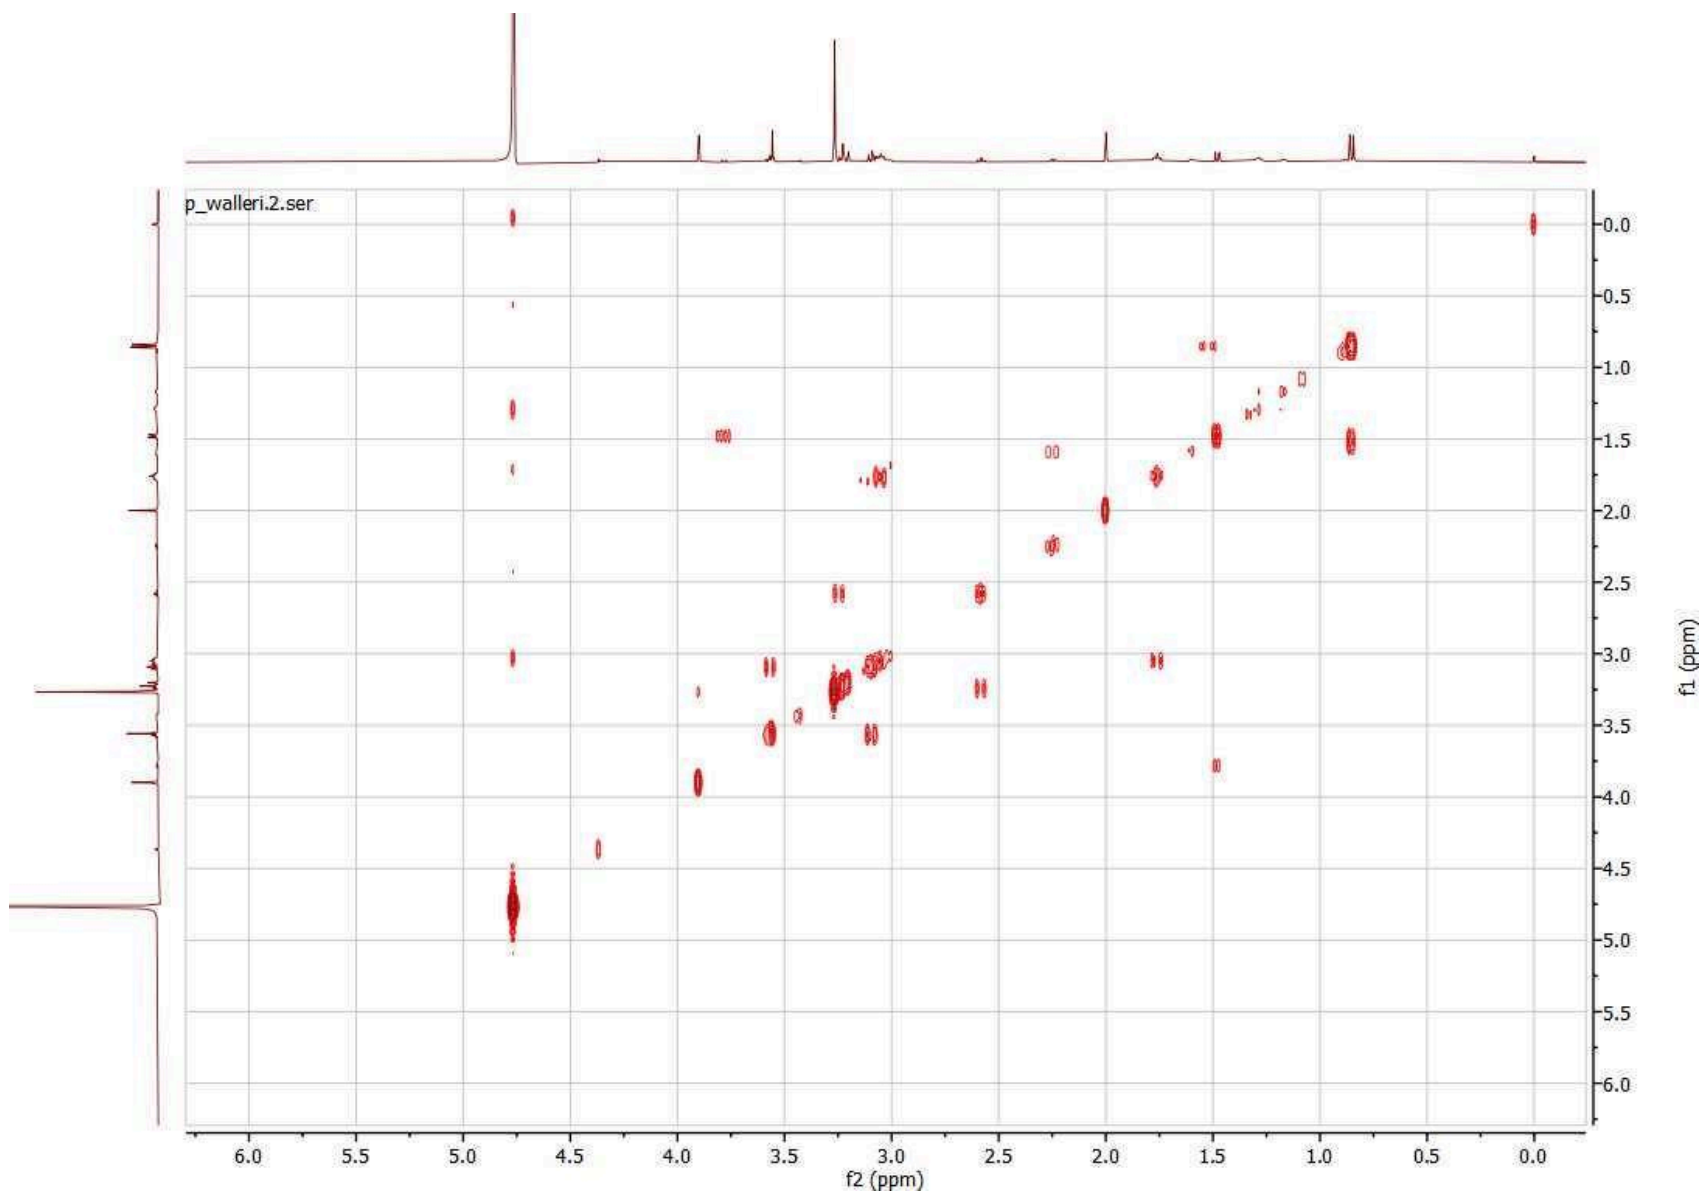

***Paraplectana walleri* – 2D COSY**

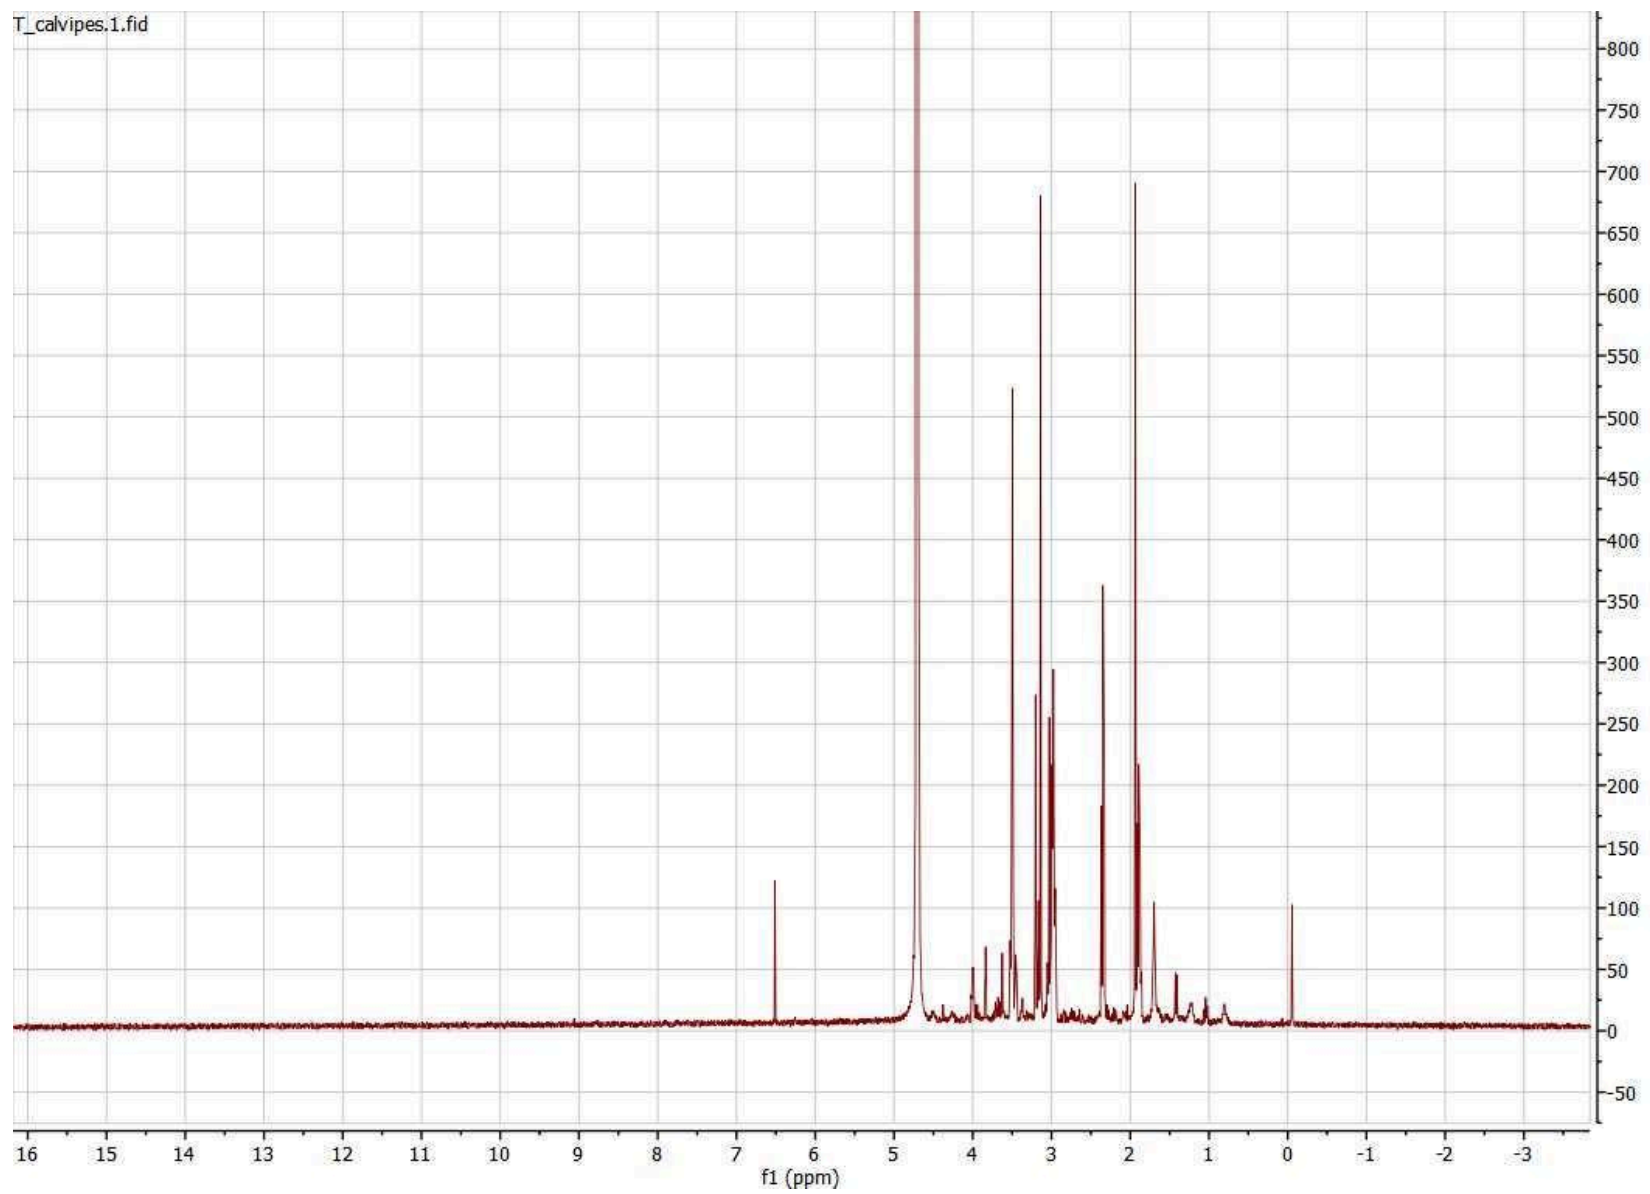

***Trichonephila clavipes* – Survey Spectra**

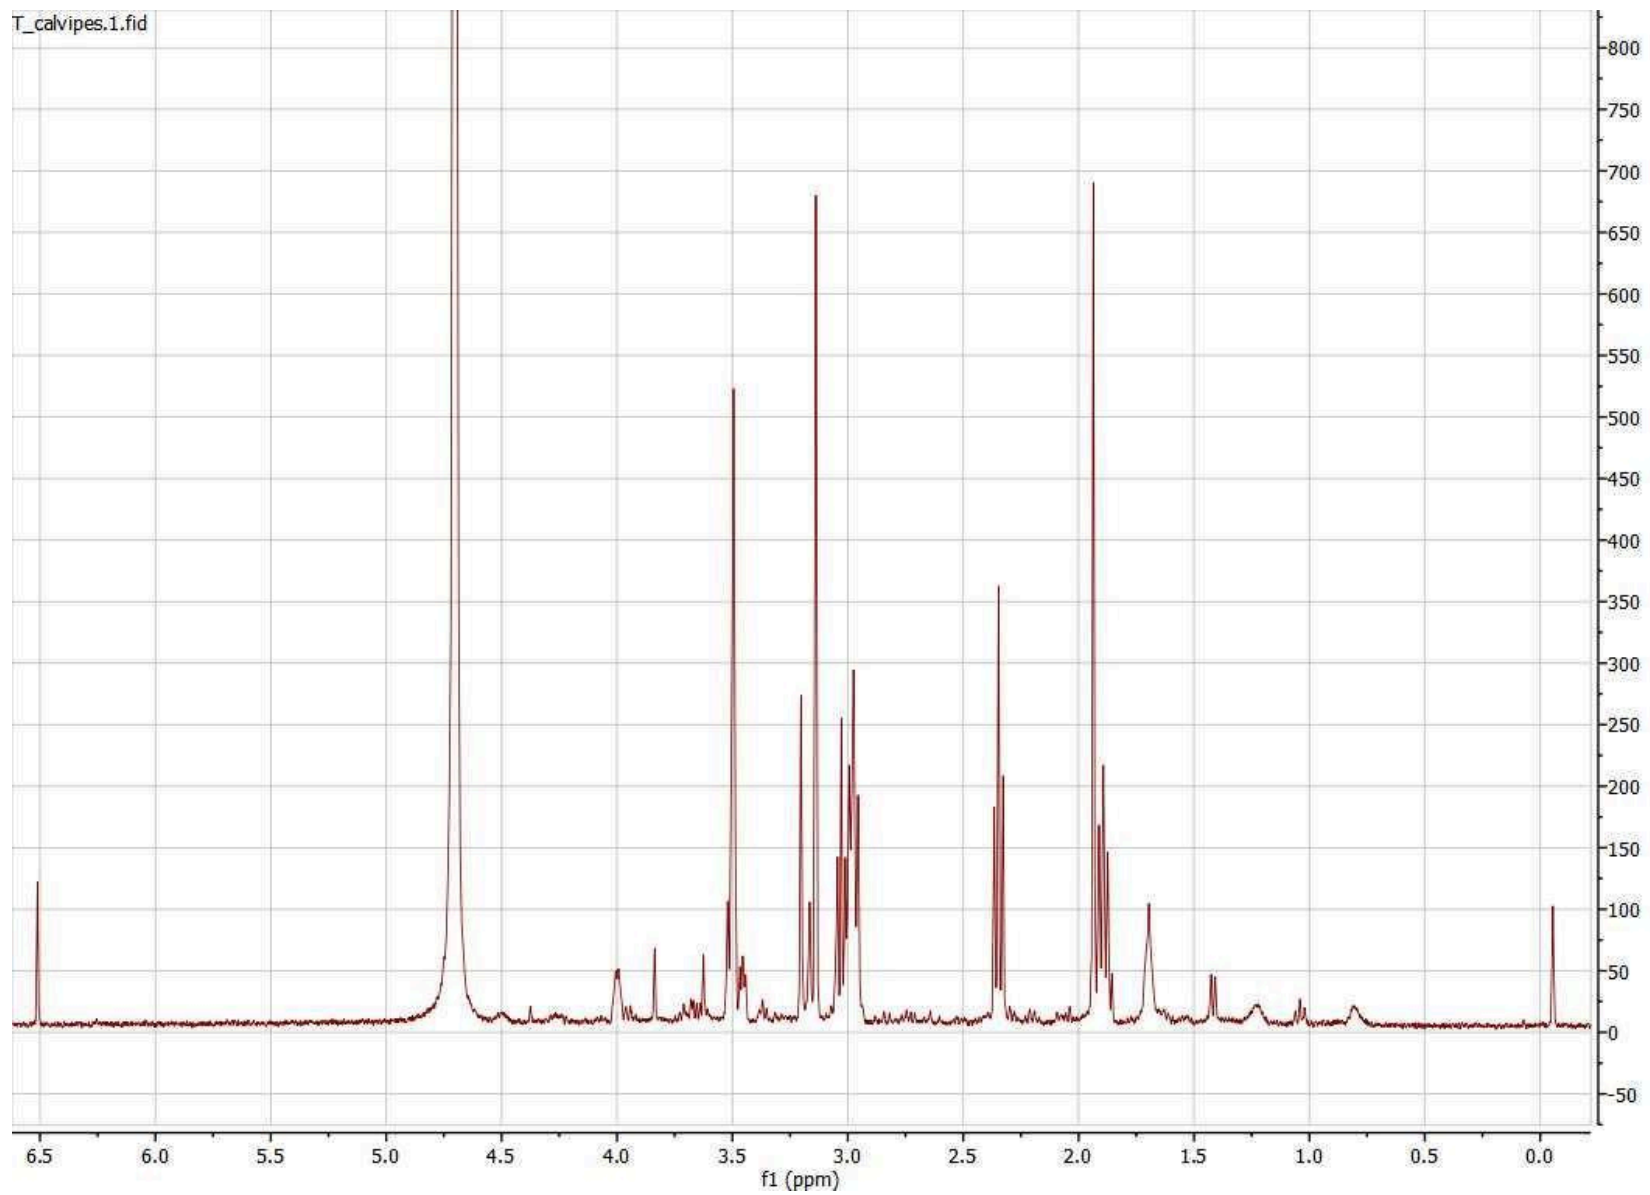

*Trichonephila clavipes* – Extended Spectra

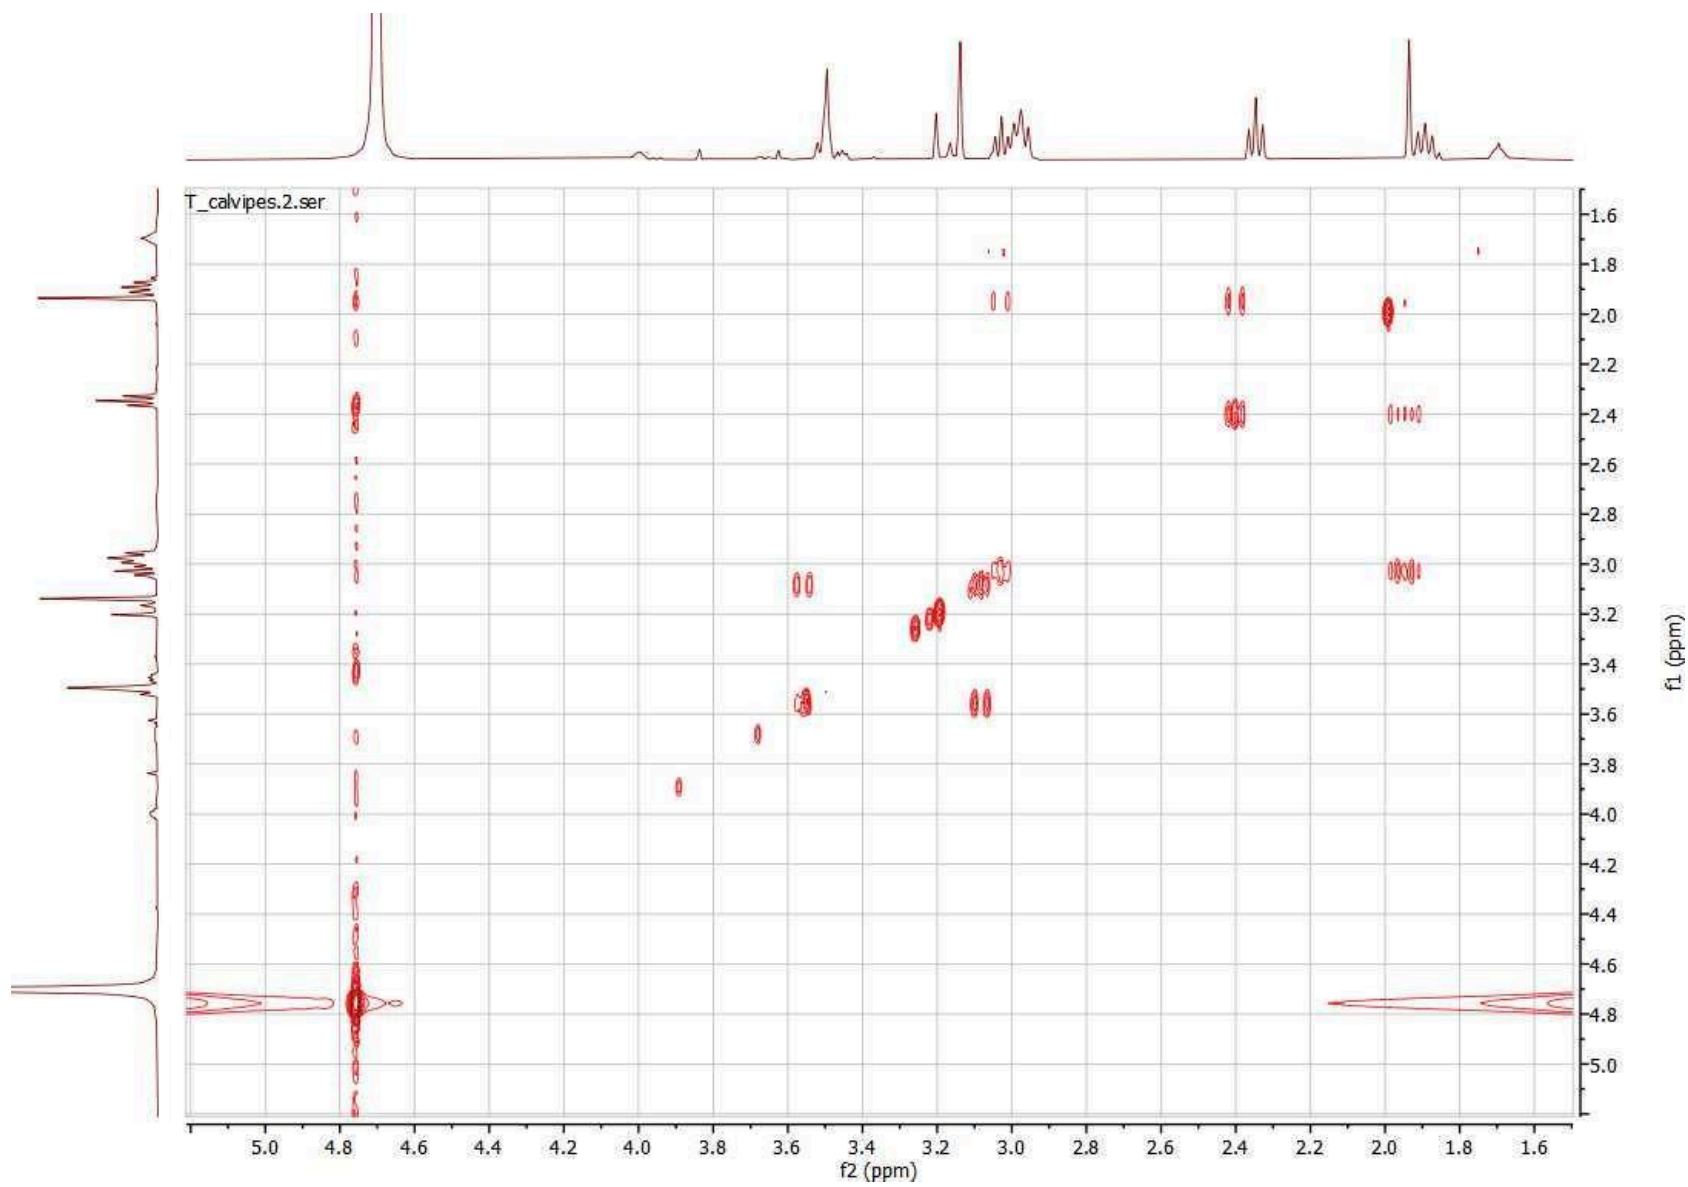

***Trichonephila clavipes* – 2D COSY**
