# Supplementary material for: Special Prey, Special Glue: NMR Spectroscopy on Aggregate Glue Components of Moth-Specialist Spiders, Cyrtarachninae
Source: MDPI journal article supplement (doi:10.3390/biomimetics9050256), 2024-04-23
Supplement: s1 [file s1]

**Supplemental Table S1. Genbank IDs for all loci used for molecular tree generation.** We were unable to obtain genetic information from *C. ixoides*.

|                         | <b>16S</b> | <b>COI</b> | <b>18S</b> | <b>28S</b> |
|-------------------------|------------|------------|------------|------------|
| <i>A. argentata</i>     | FJ607446.1 | FJ607554.1 | FJ607480.1 | FJ607519.1 |
| <i>A. trifasciata</i>   | MK420199.1 | FJ525316.1 | FJ525386.1 | MK425972.1 |
| <i>C. akermani</i>      | PP377646   | PP359446   | PP377642   | PP377644   |
| <i>C. akirai</i>        | PP355199   | AB820892.1 | AB910450.1 | AB910481.1 |
| <i>C. bufo</i>          | MK420214.1 | AB820871.1 | AB910451.1 | AB910482.1 |
| <i>C. nagasakiensis</i> | MK420216.1 | MK420096.1 | AB910457.1 | AB910488.1 |
| <i>C. yunoharuensis</i> | MK420217.1 | MK420097.1 | AB910459.1 | AB910490.1 |
| <i>G. cancriformis</i>  | FJ525354.1 | FJ525321.1 | FJ525391.1 | FJ525373.1 |
| <i>L. cornutus</i>      | MK420237.1 | FJ525322.1 | EU003349.1 | JN816940.1 |
| <i>M. hutchinsoni</i>   | MK420246.1 | MK420131.1 | MK426129.1 | MK426009.1 |
| <i>P. walleri</i>       | PP377647   | PP359447   | PP377643   | PP377645   |
| <i>T. clavipes</i>      | MK420256.1 | MK420140.1 | MK426138.1 | MK426047.1 |
| <i>T. versicolor</i>    | FJ525350.1 | FJ525317.1 | FJ525387.1 | FJ525369.1 |

Supplementary Figures:

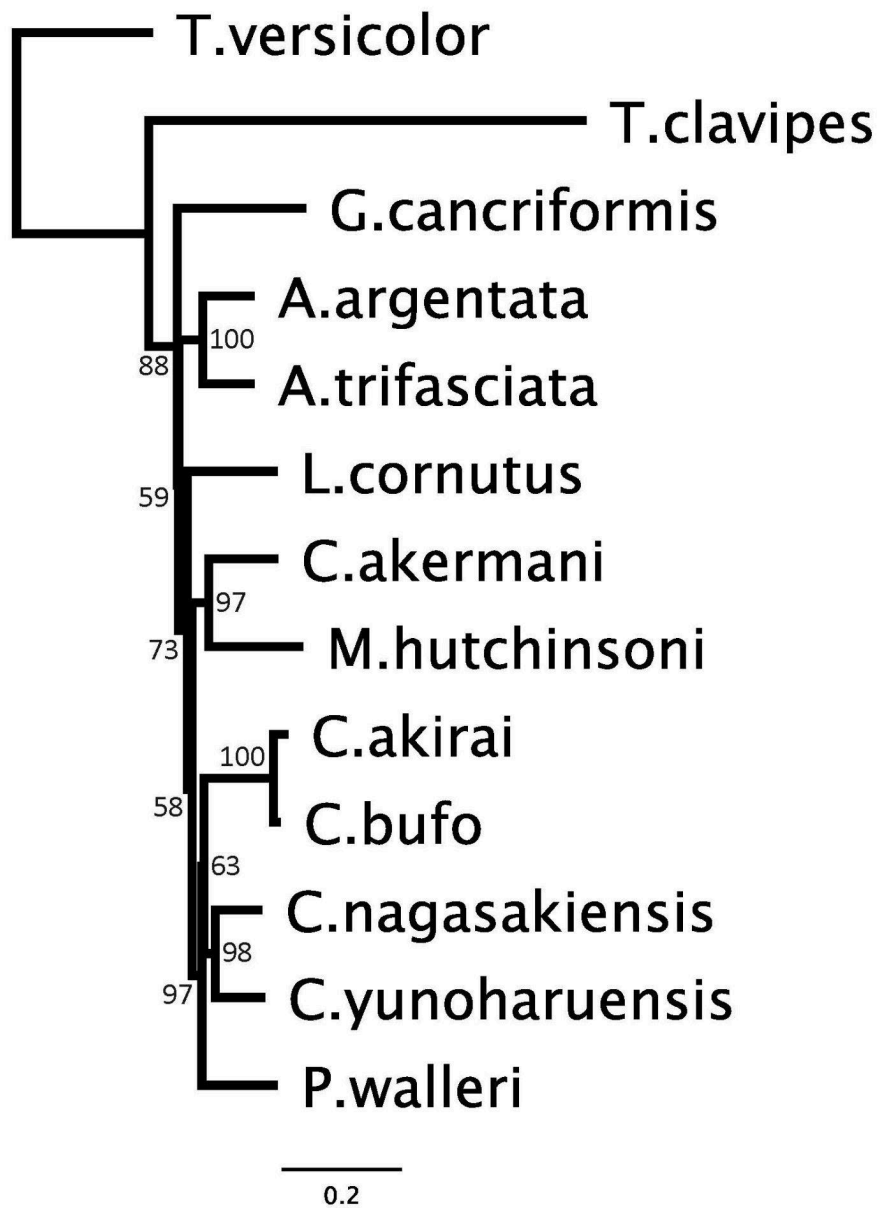

**Figure S1. Phylogenetic tree.** Relationships were generated from 16s, COI, 18s, and 28s loci (see Table S1). Genetic material from the moth-specialist species were collected as part of this study, while generalist species were taken from previous studies [43, 49, 50, 51]. We were unable to obtain genetic information from *C. ixoides*. *T. versicolor* was used as an outgroup in this tree; since its aggregate glue was not studied, it was not included in the main set of figures.

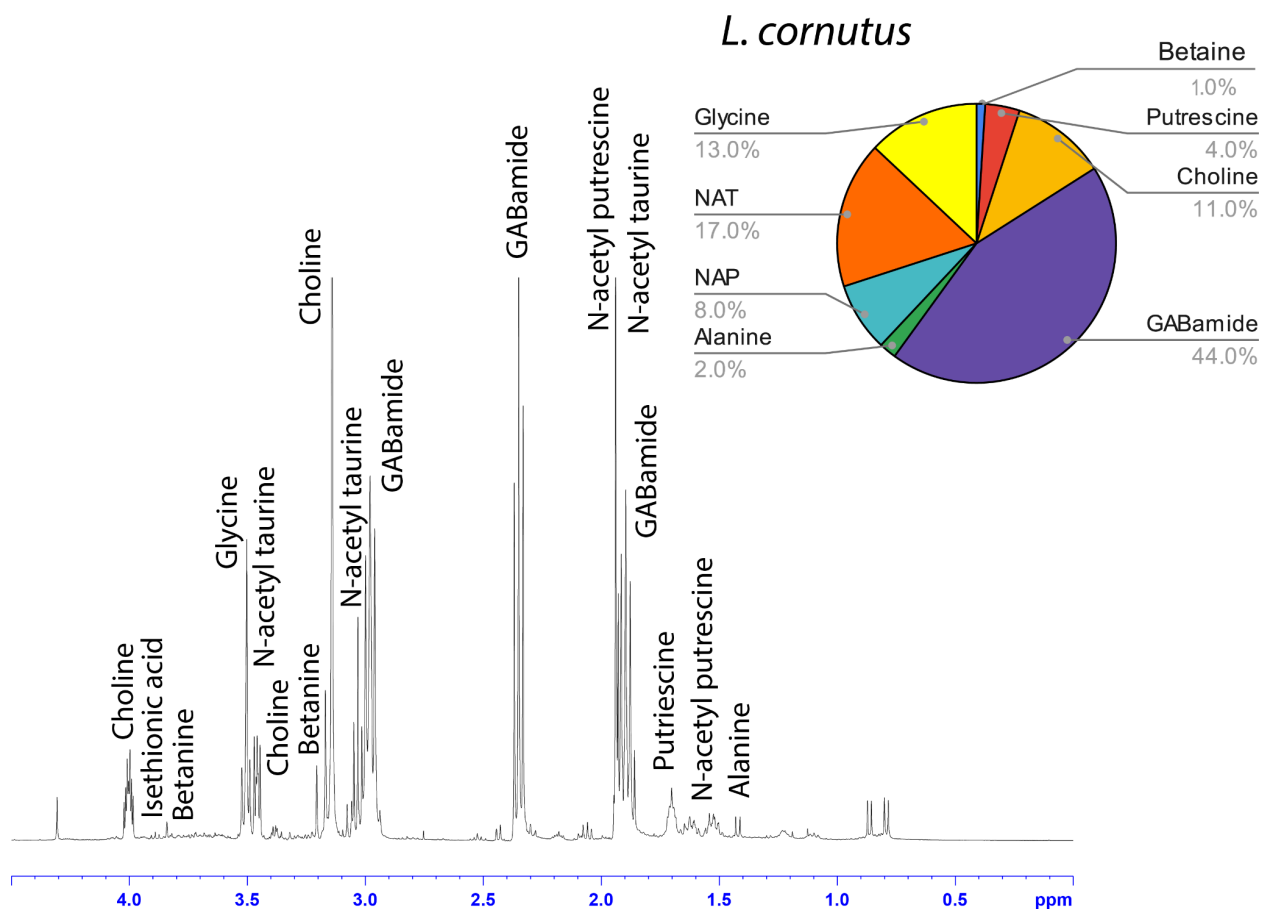

**Figure S2.** <sup>1</sup>H solution state 400-MHz NMR spectrum of water soluble LMMCs dissolved in D<sub>2</sub>O from the aggregate glue of *L. cornutus*. Labeled peaks have been identified by comparison to Jain et al. (2018). The color-coded pie chart displays the relative abundance of each LMMC extracted from the aggregate glue. The abbreviation NAP stands for NAP, *N*-acetylputrescine and NAT stands for *N*-acetyltaurine.

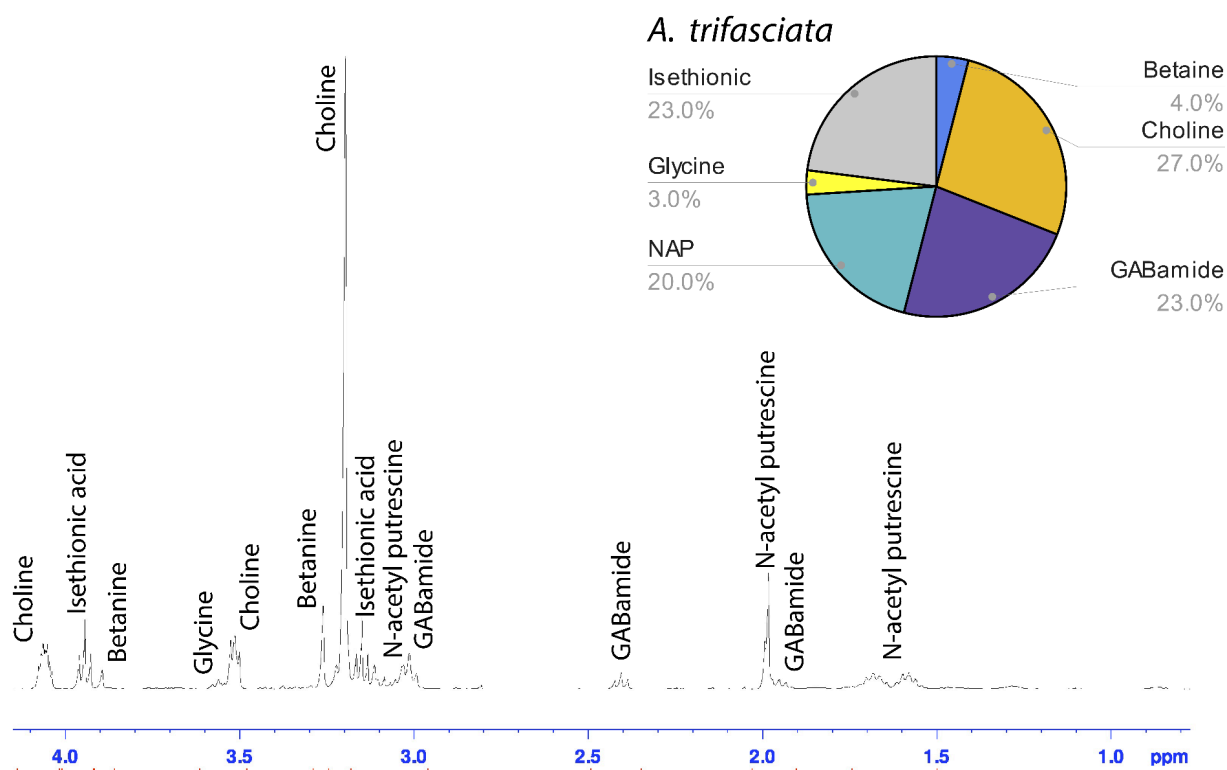

**Figure S3.** <sup>1</sup>H solution state 400-MHz NMR spectrum of water soluble LMMCs dissolved in D<sub>2</sub>O from the aggregate glue of *A. trifasciata*. Labeled peaks have been identified by comparison to Jain et al. (2018). The color-coded pie chart displays the relative abundance of each LMMC extracted from the aggregate glue. The abbreviation NAP stands for NAP, *N*-acetylputrescine.

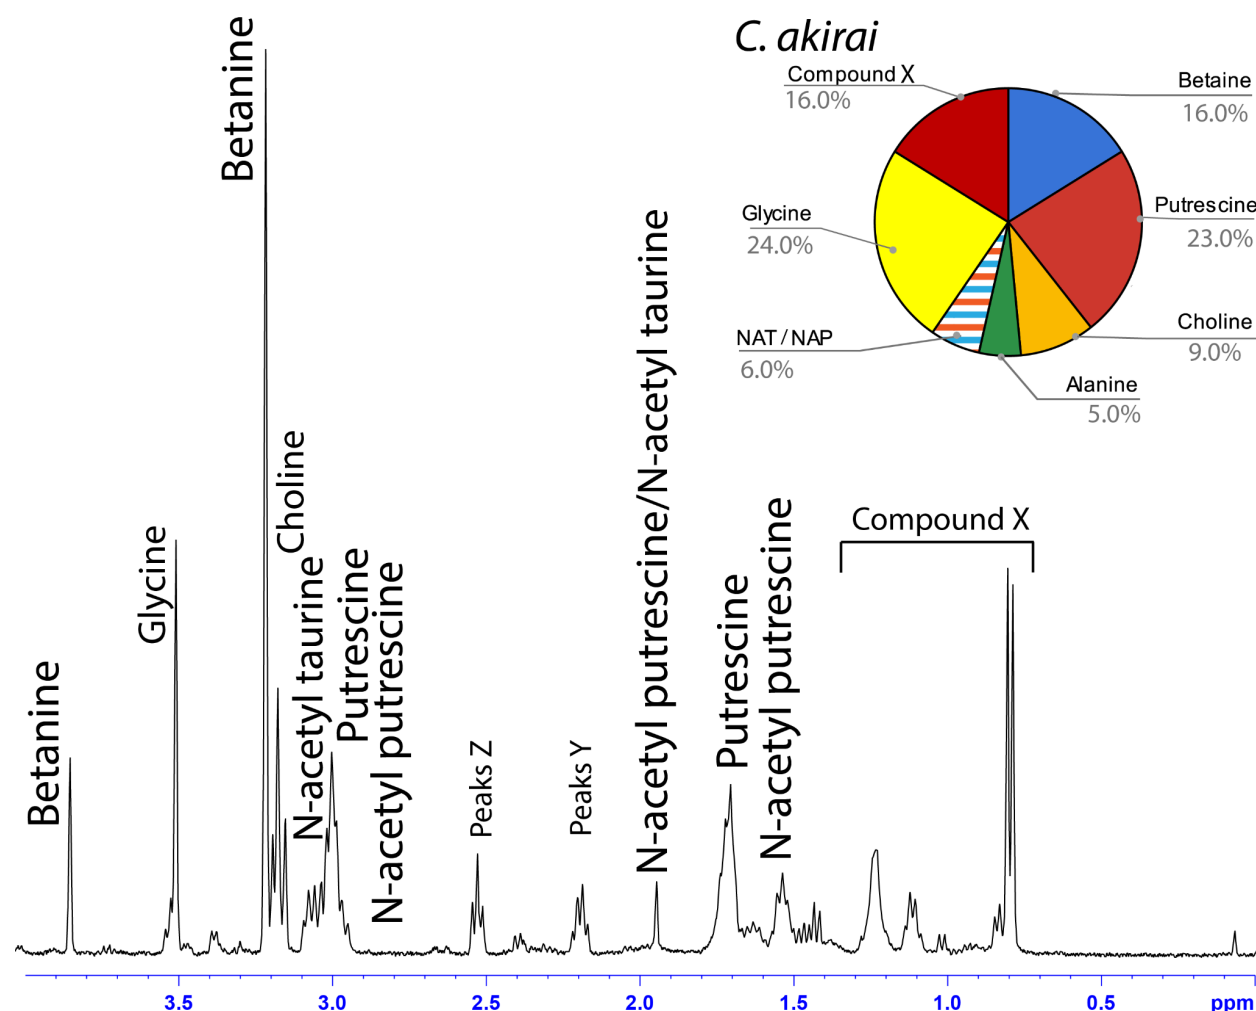

**Figure S4.**  $^1\text{H}$  solution state 400-MHz NMR spectrum of water soluble LMMCs dissolved in  $\text{D}_2\text{O}$  from the aggregate glue of *C. akirai*. Labeled peaks have been identified by comparison to Jain et al. (2018). The color-coded pie chart displays the relative abundance of each LMMC extracted from the aggregate glue. We were unable to measure the percentages of peaks Y and Z. The abbreviation NAP stands for NAP, *N*-acetylputrescine and NAT stands for *N*-acetyltaurine. Due to peak overlap, we were not able to estimate NAT and NAP separately.

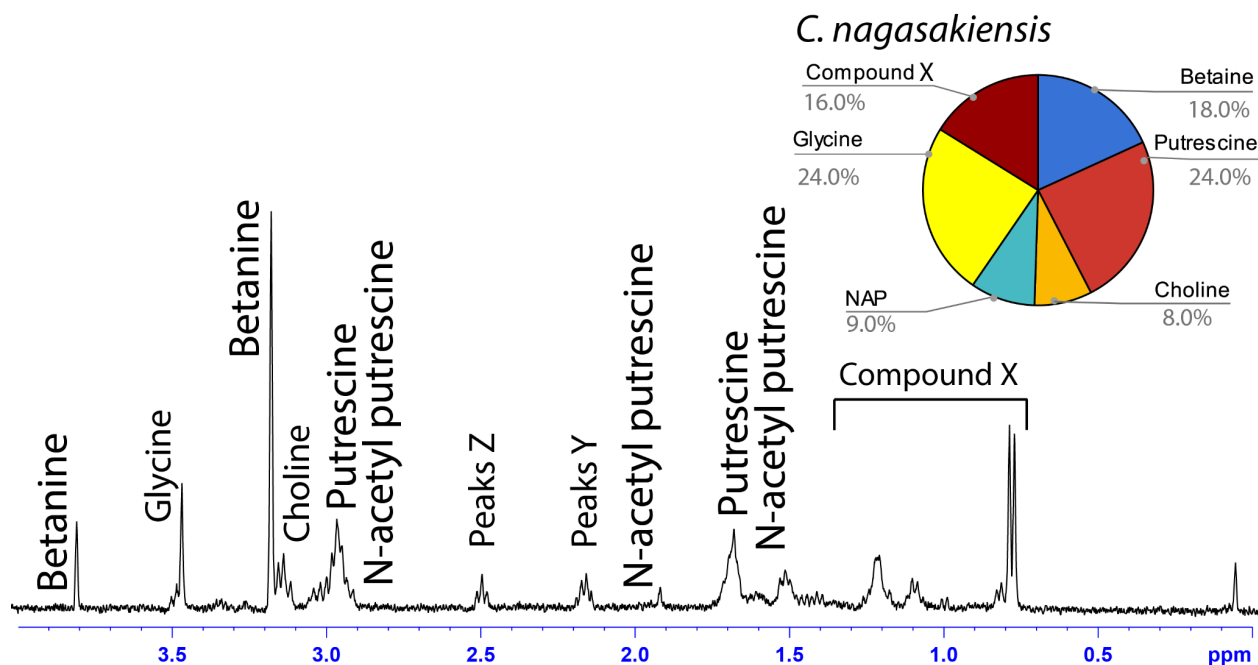

**Figure S5.  $^1\text{H}$  solution state 400-MHz NMR spectrum of water soluble LMMCs dissolved in  $\text{D}_2\text{O}$  from the aggregate glue of *C. nagasakiensis*.** Labeled peaks have been identified by comparison to Jain et al. (2018). The color-coded pie chart displays the relative abundance of each LMMC extracted from the aggregate glue. We were unable to measure the percentages of peaks Y and Z. The abbreviation NAP stands for NAP *N*-acetylputrescine.

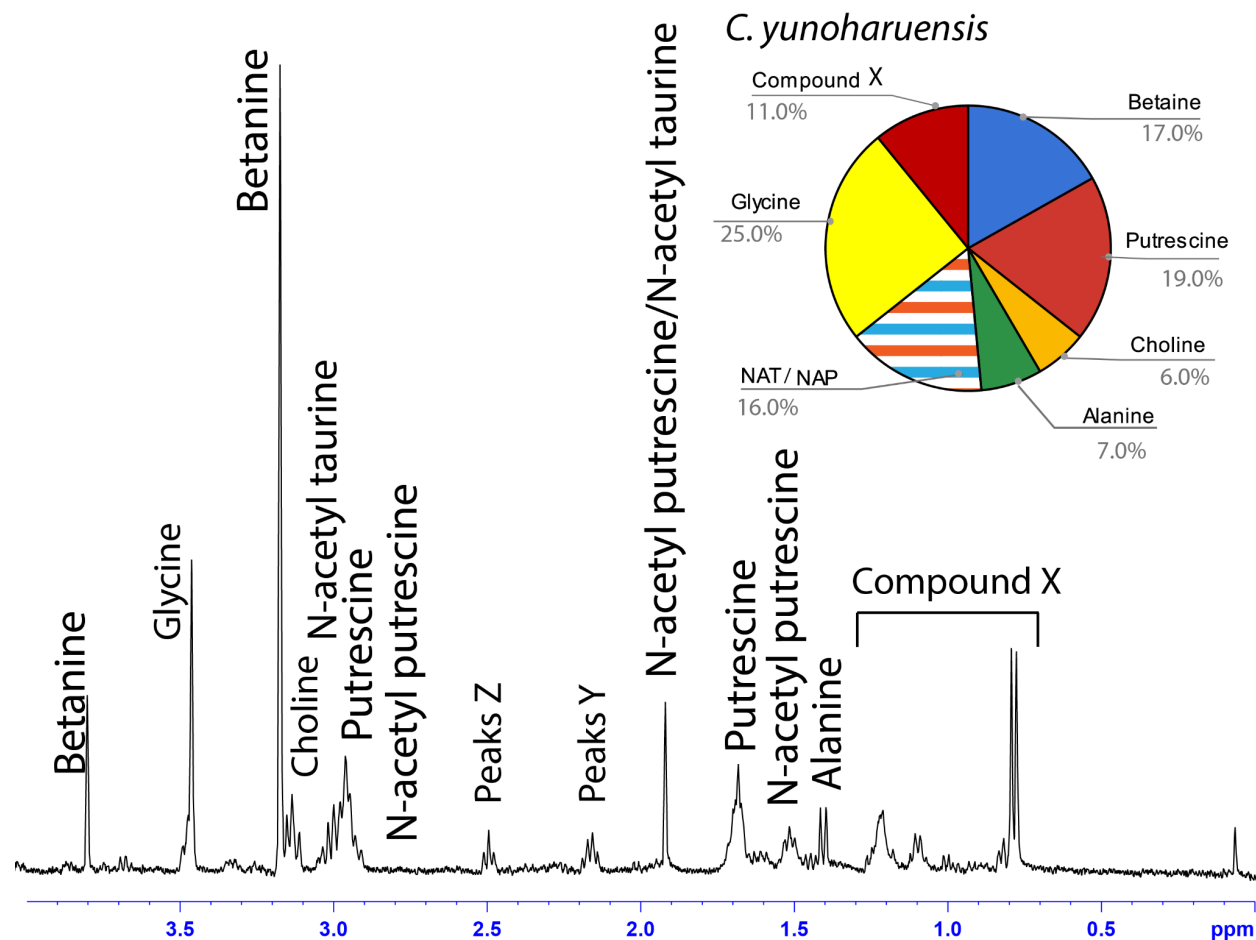

**Figure S6.  $^1\text{H}$  solution state 400-MHz NMR spectrum of water soluble LMMCs dissolved in  $\text{D}_2\text{O}$  from the aggregate glue of *C. yunoharuensis*.** Labeled peaks have been identified by comparison to Jain et al. (2018). The color-coded pie chart displays the relative abundance of each LMMC extracted from the aggregate glue. We were unable to measure the percentages of peaks Y and Z. The abbreviation NAP stands for NAP, *N*-acetylputrescine and NAT stands for *N*-acetyltaurine. Due to peak overlap, we were not able to estimate NAT and NAP separately.

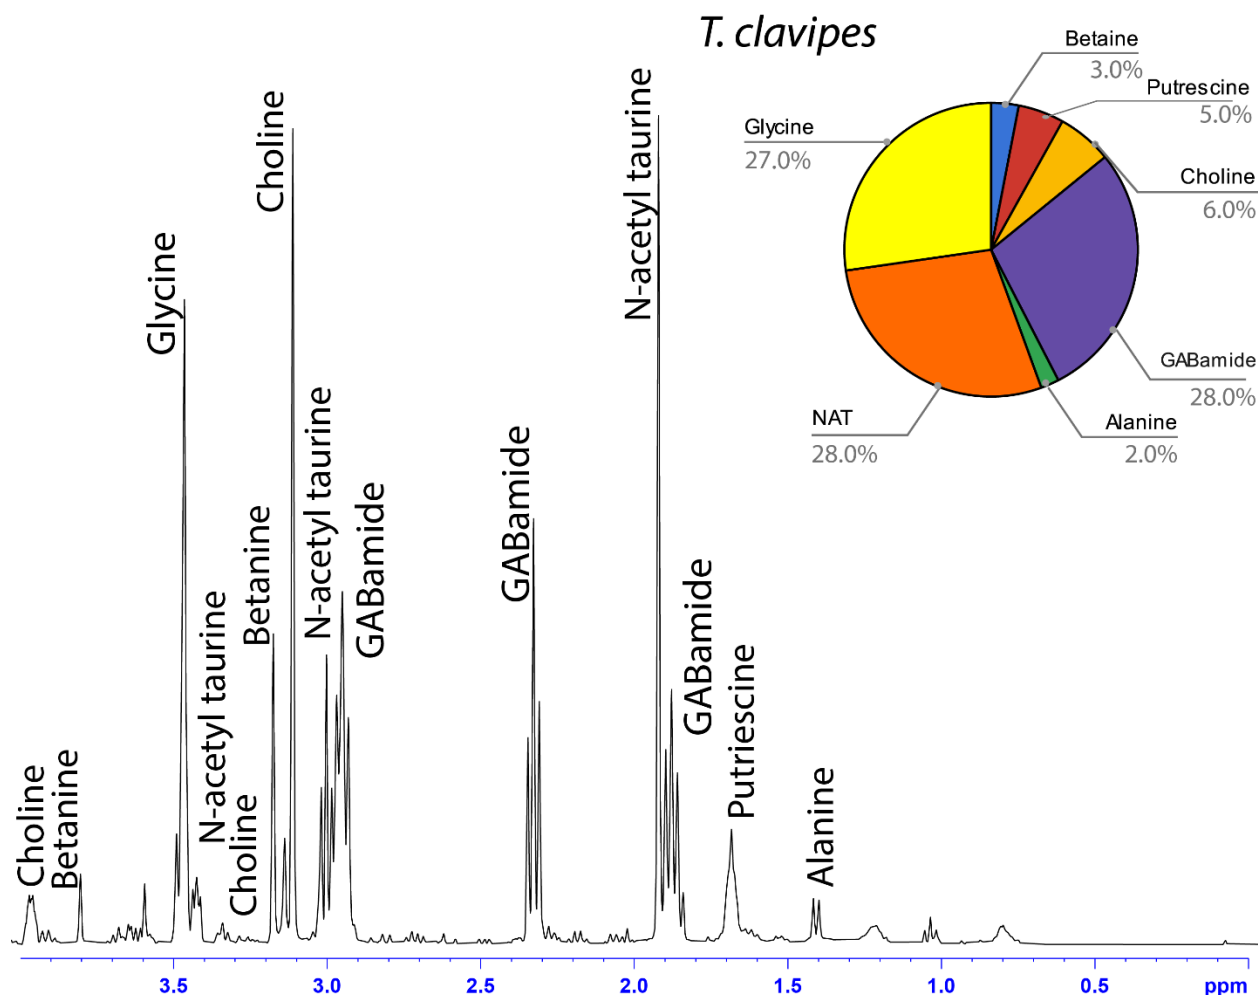

**Figure S7.**  $^1\text{H}$  solution state 400-MHz NMR spectrum of water soluble LMMCs dissolved in  $\text{D}_2\text{O}$  from the aggregate glue of *T. clavipes*. Labeled peaks have been identified by comparison to Jain et al. (2018). The color-coded pie chart displays the relative abundance of each LMMC extracted from the aggregate glue. We were unable to measure the percentages of peaks Y and Z. The abbreviation NAT stands for *N*-acetyltaurine.



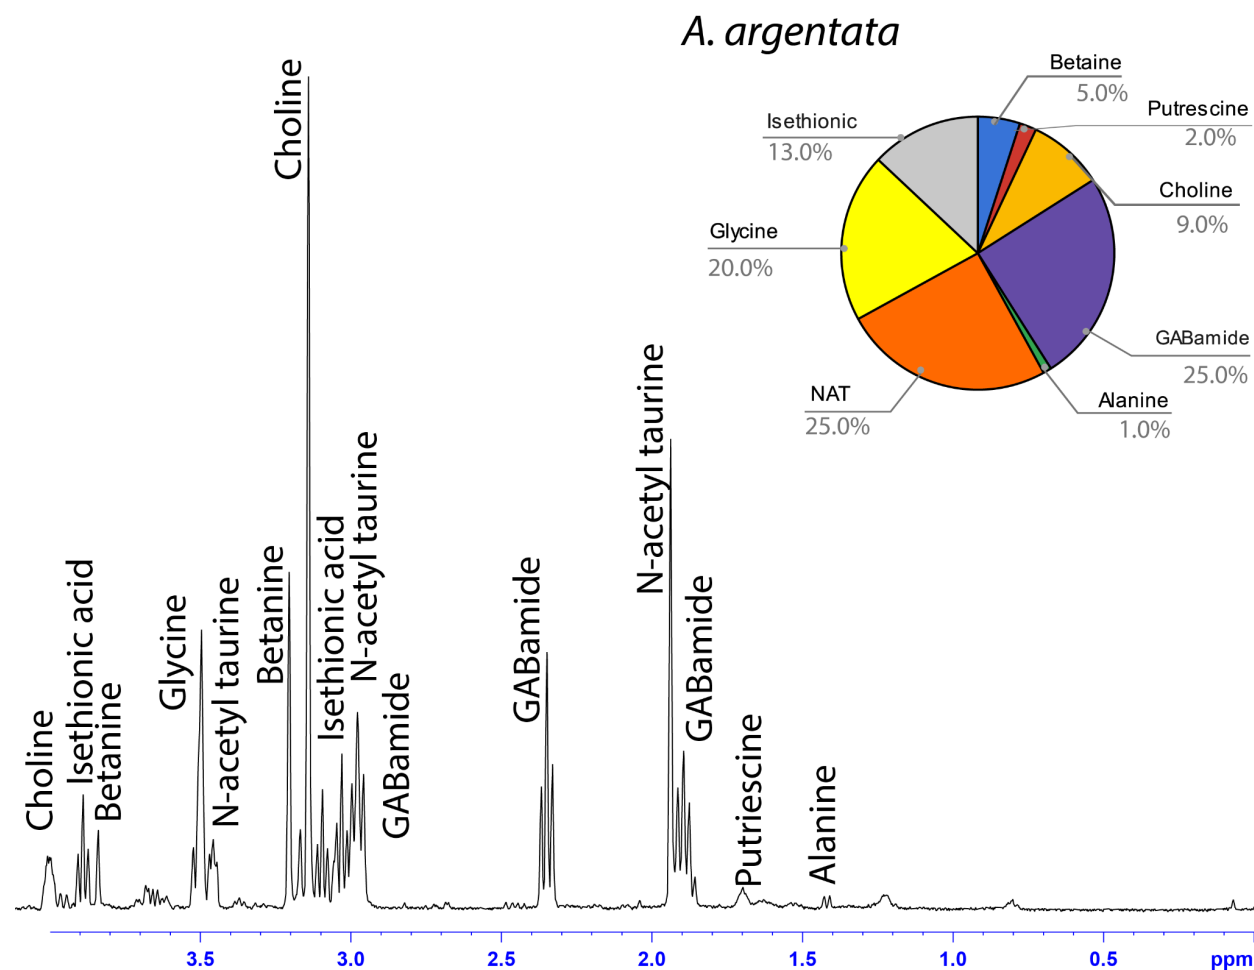

**Figure S8.** <sup>1</sup>H solution state 400-MHz NMR spectrum of water soluble LMMCs dissolved in D<sub>2</sub>O from the aggregate glue of *A. argentata*. Peaks that have been identified by comparison to previously studied species are labeled. The spectrum is accompanied by a color coded pie chart that displays the relative abundance of each LMMC extracted from the aggregate glue. NAT, *N*-acetyltaurine.

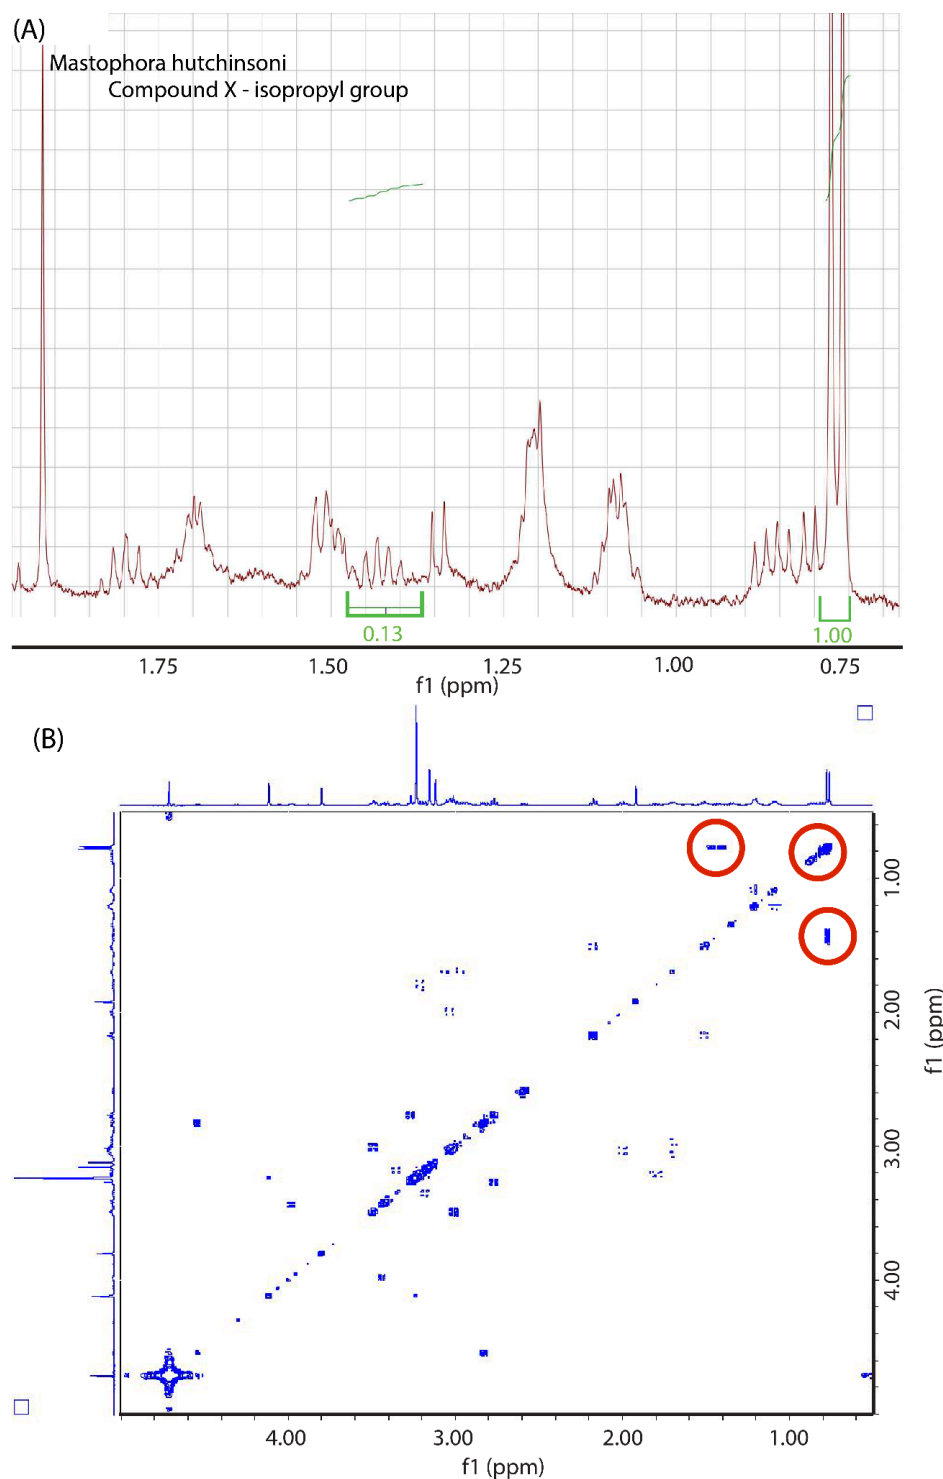

**Figure S9. Identification of an isopropyl splitting/coupling pattern observed in the aggregate glue of *M. hutchinsoni*.** (A)  $^1\text{H}$  Solution State 400 MHz NMR spectrum of water soluble LMMCs dissolved in  $\text{D}_2\text{O}$  from the aggregate glue of *M. hutchinsoni* displaying the relative integrations of the coupled doublet and septet peaks located at 0.8 ppm and 1.5 ppm, respectively. (B)  $^1\text{H}$ - $^1\text{H}$  NMR Correlation Spectroscopy 2D NMR spectrum of water soluble LMMCs dissolved in  $\text{D}_2\text{O}$  from the aggregate glue of *M. hutchinsoni*.
